# Supplementary material
Source: bioRxiv or medRxiv preprint supplement (https://medrxiv.org/highwire/filestream/96985/field_highwire_adjunct_files/0/2020.06.16.20132464-1.pdf)
Supplement: Supplementary file [file 2020.06.16.20132464-1.pdf]

CoronaAnimalProd\_FoodSupply\_10Sept\_2020.sas

/\* Relationship between coronavirus and food consumption  
 Corona virus data:  
<https://www.worldometers.info/coronavirus/> 10 sept 2020  
 Live Animal production data <http://www.fao.org/faostat/en/#data/QA>  
 S. A. RAFAT \*/

/\*  
 Domain CodeDomainCountry CodeCountryElement CodeElementItem CodeItemYear CodeYearUnitValueFlagFlag  
 Description  
 Food supply quantity kg/capita/yr 2013 fao stat \*/

```
data food;
input country $ element $ year unit $ quantity;
cards;
Afghanistan BovineMeat 2013 kg 4.59
Afghanistan ButterGhee 2013 kg 1.17
Afghanistan Cheese 2013 kg 0.79
Afghanistan Cream 2013 kg 0.6
Afghanistan Eggs 2013 kg 1.3
Afghanistan FreshwaterFish 2013 kg 0.07
Afghanistan Honey 2013 kg 0.07
Afghanistan Milkwhole 2013 kg 31.92
Afghanistan PoultryMeat 2013 kg 2.45
Albania AquaticAnimalsOthers 2013 kg 0
Albania AquaticPlants 2013 kg 0
Albania BovineMeat 2013 kg 22.5
Albania ButterGhee 2013 kg 1.19
Albania Cephalopods 2013 kg 0.37
Albania Cheese 2013 kg 6.25
Albania Cream 2013 kg 0.03
Albania DemersalFish 2013 kg 0.98
Albania Eggs 2013 kg 12.45
Albania FreshwaterFish 2013 kg 0.76
Albania Honey 2013 kg 0.95
Albania MarineFishOther 2013 kg 0.67
Albania Milkwhole 2013 kg 235.18
Albania Pigmeat 2013 kg 10.88
Albania PoultryMeat 2013 kg 13.23
Algeria AquaticAnimalsOthers 2013 kg 0
Algeria AquaticPlants 2013 kg 0
Algeria BovineMeat 2013 kg 5.6
Algeria ButterGhee 2013 kg 0.5
Algeria Cephalopods 2013 kg 0.05
Algeria Cheese 2013 kg 0.7
Algeria DemersalFish 2013 kg 0.42
Algeria Eggs 2013 kg 8.06
Algeria FreshwaterFish 2013 kg 0.34
Algeria Honey 2013 kg 0.17
Algeria MarineFishOther 2013 kg 0.43
Algeria Milkwhole 2013 kg 100.83
Algeria Pigmeat 2013 kg 0
Algeria PoultryMeat 2013 kg 7.42
Algeria whey 2013 kg 1.05
Angola AquaticAnimalsOthers 2013 kg 0
Angola AquaticPlants 2013 kg 0
Angola BovineMeat 2013 kg 8.42
Angola ButterGhee 2013 kg 0.09
Angola Cephalopods 2013 kg 0.06
Angola Cheese 2013 kg 0.24
Angola DemersalFish 2013 kg 6.12
Angola Eggs 2013 kg 1.11
Angola FreshwaterFish 2013 kg 0.92
Angola Honey 2013 kg 1.09
Angola MarineFishOther 2013 kg 1.14
Angola Milkwhole 2013 kg 9.68
Angola Pigmeat 2013 kg 8.89
Angola PoultryMeat 2013 kg 17.33
AntiguaandBarbuda AquaticPlants 2013 kg 0
AntiguaandBarbuda BovineMeat 2013 kg 12.42
AntiguaandBarbuda ButterGhee 2013 kg 1.76
AntiguaandBarbuda Cephalopods 2013 kg 0.3
AntiguaandBarbuda Cheese 2013 kg 6.08
AntiguaandBarbuda Cream 2013 kg 1.41
AntiguaandBarbuda DemersalFish 2013 kg 8.43
AntiguaandBarbuda Eggs 2013 kg 4.33
AntiguaandBarbuda FreshwaterFish 2013 kg 0.74
AntiguaandBarbuda Honey 2013 kg 0.42
AntiguaandBarbuda MarineFishOther 2013 kg 18.02
AntiguaandBarbuda Milkwhole 2013 kg 80.09
```

CoronaAnimalProd\_FoodSupply\_10Sept\_2020.sas

|                   |                      |      |    |        |  |
|-------------------|----------------------|------|----|--------|--|
| AntiguaandBarbuda | Pigmeat              | 2013 | kg | 11.44  |  |
| AntiguaandBarbuda | PoultryMeat          | 2013 | kg | 58.82  |  |
| Argentina         | AquaticAnimalsOthers | 2013 | kg | 0      |  |
| Argentina         | AquaticPlants        | 2013 | kg | 0      |  |
| Argentina         | BovineMeat           | 2013 | kg | 55.48  |  |
| Argentina         | ButterGhee           | 2013 | kg | 0.92   |  |
| Argentina         | Cephalopods          | 2013 | kg | 1.51   |  |
| Argentina         | Cheese               | 2013 | kg | 11.96  |  |
| Argentina         | Cream                | 2013 | kg | 0.1    |  |
| Argentina         | DemersalFish         | 2013 | kg | 2.63   |  |
| Argentina         | Eggs                 | 2013 | kg | 11.39  |  |
| Argentina         | FreshwaterFish       | 2013 | kg | 0.21   |  |
| Argentina         | Honey                | 2013 | kg | 0.06   |  |
| Argentina         | MarineFishOther      | 2013 | kg | 0.01   |  |
| Argentina         | Milkwhole            | 2013 | kg | 72.81  |  |
| Argentina         | Pigmeat              | 2013 | kg | 10.51  |  |
| Argentina         | PoultryMeat          | 2013 | kg | 38.66  |  |
| Argentina         | Whey                 | 2013 | kg | 1.74   |  |
| Armenia           | AquaticAnimalsOthers | 2013 | kg | 0      |  |
| Armenia           | AquaticPlants        | 2013 | kg | 0      |  |
| Armenia           | BovineMeat           | 2013 | kg | 19.66  |  |
| Armenia           | ButterGhee           | 2013 | kg | 1.76   |  |
| Armenia           | Cephalopods          | 2013 | kg | 0      |  |
| Armenia           | Cheese               | 2013 | kg | 5.72   |  |
| Armenia           | Cream                | 2013 | kg | 0.01   |  |
| Armenia           | DemersalFish         | 2013 | kg | 0.07   |  |
| Armenia           | Eggs                 | 2013 | kg | 11.69  |  |
| Armenia           | FreshwaterFish       | 2013 | kg | 3.28   |  |
| Armenia           | Honey                | 2013 | kg | 0.7    |  |
| Armenia           | MarineFishOther      | 2013 | kg | 0.18   |  |
| Armenia           | Milkwhole            | 2013 | kg | 162.96 |  |
| Armenia           | Pigmeat              | 2013 | kg | 9.67   |  |
| Armenia           | PoultryMeat          | 2013 | kg | 13.35  |  |
| Australia         | AquaticAnimalsOthers | 2013 | kg | 0.23   |  |
| Australia         | AquaticPlants        | 2013 | kg | 0      |  |
| Australia         | BovineMeat           | 2013 | kg | 33.86  |  |
| Australia         | ButterGhee           | 2013 | kg | 3.67   |  |
| Australia         | Cephalopods          | 2013 | kg | 1.21   |  |
| Australia         | Cheese               | 2013 | kg | 10.17  |  |
| Australia         | Cream                | 2013 | kg | 0.29   |  |
| Australia         | DemersalFish         | 2013 | kg | 6.88   |  |
| Australia         | Eggs                 | 2013 | kg | 8.51   |  |
| Australia         | FreshwaterFish       | 2013 | kg | 4.11   |  |
| Australia         | Honey                | 2013 | kg | 0.43   |  |
| Australia         | MarineFishOther      | 2013 | kg | 2.18   |  |
| Australia         | Milkwhole            | 2013 | kg | 123.78 |  |
| Australia         | Pigmeat              | 2013 | kg | 24.14  |  |
| Australia         | PoultryMeat          | 2013 | kg | 46.12  |  |
| Austria           | AquaticAnimalsOthers | 2013 | kg | 0.03   |  |
| Austria           | AquaticPlants        | 2013 | kg | 0      |  |
| Austria           | BovineMeat           | 2013 | kg | 17.14  |  |
| Austria           | ButterGhee           | 2013 | kg | 5.54   |  |
| Austria           | Cephalopods          | 2013 | kg | 0.18   |  |
| Austria           | Cheese               | 2013 | kg | 23.29  |  |
| Austria           | Cream                | 2013 | kg | 7.91   |  |
| Austria           | DemersalFish         | 2013 | kg | 2.96   |  |
| Austria           | Eggs                 | 2013 | kg | 14.68  |  |
| Austria           | FreshwaterFish       | 2013 | kg | 4.07   |  |
| Austria           | Honey                | 2013 | kg | 1.32   |  |
| Austria           | MarineFishOther      | 2013 | kg | 0.81   |  |
| Austria           | Milkwhole            | 2013 | kg | 15.83  |  |
| Austria           | Pigmeat              | 2013 | kg | 52.56  |  |
| Austria           | PoultryMeat          | 2013 | kg | 18.61  |  |
| Azerbaijan        | AquaticAnimalsOthers | 2013 | kg | 0      |  |
| Azerbaijan        | AquaticPlants        | 2013 | kg | 0      |  |
| Azerbaijan        | BovineMeat           | 2013 | kg | 12.68  |  |
| Azerbaijan        | ButterGhee           | 2013 | kg | 3.2    |  |
| Azerbaijan        | Cephalopods          | 2013 | kg | 0      |  |
| Azerbaijan        | Cheese               | 2013 | kg | 7.3    |  |
| Azerbaijan        | Cream                | 2013 | kg | 0      |  |
| Azerbaijan        | DemersalFish         | 2013 | kg | 0.12   |  |
| Azerbaijan        | Eggs                 | 2013 | kg | 8.21   |  |
| Azerbaijan        | FreshwaterFish       | 2013 | kg | 0.16   |  |
| Azerbaijan        | Honey                | 2013 | kg | 0.27   |  |
| Azerbaijan        | MarineFishOther      | 2013 | kg | 0.05   |  |
| Azerbaijan        | Milkwhole            | 2013 | kg | 89.72  |  |
| Azerbaijan        | Pigmeat              | 2013 | kg | 0.25   |  |
| Azerbaijan        | PoultryMeat          | 2013 | kg | 10.52  |  |
| Bahamas           | AquaticAnimalsOthers | 2013 | kg | 0.01   |  |
| Bahamas           | AquaticPlants        | 2013 | kg | 0      |  |
| Bahamas           | BovineMeat           | 2013 | kg | 19.92  |  |
| Bahamas           | ButterGhee           | 2013 | kg | 2.4    |  |
| Bahamas           | Cephalopods          | 2013 | kg | 0.18   |  |
| Bahamas           | Cheese               | 2013 | kg | 10.01  |  |
| Bahamas           | Cream                | 2013 | kg | 0.2    |  |
| Bahamas           | DemersalFish         | 2013 | kg | 3.48   |  |

CoronaAnimalProd\_FoodSupply\_10Sept\_2020.sas

|            |                      |      |    |       |       |       |
|------------|----------------------|------|----|-------|-------|-------|
| Bahamas    | Eggs                 | 2013 | kg | 6.2   |       |       |
| Bahamas    | FreshwaterFish       | 2013 | kg |       | 1.05  |       |
| Bahamas    | Honey                | 2013 | kg | 0.46  |       |       |
| Bahamas    | MarineFishOther      | 2013 | kg |       |       | 0.82  |
| Bahamas    | Milkwhole            | 2013 | kg | 36.21 |       |       |
| Bahamas    | Pigmeat              | 2013 | kg | 32.74 |       |       |
| Bahamas    | PoultryMeat          | 2013 | kg |       | 45.74 |       |
| Bahamas    | whey                 | 2013 | kg | 0.32  |       |       |
| Bangladesh | AquaticAnimalsOthers | 2013 | kg |       |       | 0     |
| Bangladesh | AquaticPlants        | 2013 | kg |       |       | 0     |
| Bangladesh | BovineMeat           | 2013 | kg |       | 1.28  |       |
| Bangladesh | ButterGhee           | 2013 | kg |       | 0.2   |       |
| Bangladesh | Cephalopods          | 2013 | kg |       | 0     |       |
| Bangladesh | Cheese               | 2013 | kg | 0.01  |       |       |
| Bangladesh | Cream                | 2013 | kg | 0     |       |       |
| Bangladesh | DemersalFish         | 2013 | kg |       |       | 0.6   |
| Bangladesh | Eggs                 | 2013 | kg | 2.08  |       |       |
| Bangladesh | FreshwaterFish       | 2013 | kg |       |       | 16.26 |
| Bangladesh | Honey                | 2013 | kg | 0     |       |       |
| Bangladesh | MarineFishOther      | 2013 | kg |       |       | 0.73  |
| Bangladesh | Milkwhole            | 2013 | kg |       | 19.01 |       |
| Bangladesh | Pigmeat              | 2013 | kg | 0     |       |       |
| Bangladesh | PoultryMeat          | 2013 | kg |       | 1.4   |       |
| Barbados   | AquaticPlants        | 2013 | kg |       | 0     |       |
| Barbados   | BovineMeat           | 2013 | kg |       | 13.13 |       |
| Barbados   | ButterGhee           | 2013 | kg |       | 0.75  |       |
| Barbados   | Cephalopods          | 2013 | kg |       | 0.32  |       |
| Barbados   | Cheese               | 2013 | kg | 8.68  |       |       |
| Barbados   | Cream                | 2013 | kg | 2.4   |       |       |
| Barbados   | DemersalFish         | 2013 | kg |       |       | 2.7   |
| Barbados   | Eggs                 | 2013 | kg | 9.61  |       |       |
| Barbados   | FreshwaterFish       | 2013 | kg |       |       | 0.74  |
| Barbados   | Honey                | 2013 | kg | 0.33  |       |       |
| Barbados   | MarineFishOther      | 2013 | kg |       |       | 10.49 |
| Barbados   | Milkwhole            | 2013 | kg |       | 39.29 |       |
| Barbados   | Pigmeat              | 2013 | kg | 8.3   |       |       |
| Barbados   | PoultryMeat          | 2013 | kg |       | 42.62 |       |
| Belarus    | AquaticAnimalsOthers | 2013 | kg |       |       | 0     |
| Belarus    | AquaticPlants        | 2013 | kg |       | 0     |       |
| Belarus    | BovineMeat           | 2013 | kg |       | 17.11 |       |
| Belarus    | ButterGhee           | 2013 | kg |       | 3.53  |       |
| Belarus    | Cephalopods          | 2013 | kg |       | 0.26  |       |
| Belarus    | Cheese               | 2013 | kg | 1.59  |       |       |
| Belarus    | Cream                | 2013 | kg | 0.02  |       |       |
| Belarus    | DemersalFish         | 2013 | kg |       |       | 3.32  |
| Belarus    | Eggs                 | 2013 | kg | 15.86 |       |       |
| Belarus    | FreshwaterFish       | 2013 | kg |       |       | 3.68  |
| Belarus    | Honey                | 2013 | kg | 0.33  |       |       |
| Belarus    | MarineFishOther      | 2013 | kg |       |       | 1.16  |
| Belarus    | Milkwhole            | 2013 | kg |       | 66.8  |       |
| Belarus    | Pigmeat              | 2013 | kg | 40.37 |       |       |
| Belarus    | PoultryMeat          | 2013 | kg |       | 31.29 |       |
| Belgium    | AquaticAnimalsOthers | 2013 | kg |       |       | 0.06  |
| Belgium    | AquaticPlants        | 2013 | kg |       | 0     |       |
| Belgium    | BovineMeat           | 2013 | kg |       | 15.63 |       |
| Belgium    | ButterGhee           | 2013 | kg |       | 7     |       |
| Belgium    | Cephalopods          | 2013 | kg |       | 0.25  |       |
| Belgium    | Cheese               | 2013 | kg | 18.81 |       |       |
| Belgium    | Cream                | 2013 | kg | 9.65  |       |       |
| Belgium    | DemersalFish         | 2013 | kg |       |       | 7.32  |
| Belgium    | Eggs                 | 2013 | kg | 12.59 |       |       |
| Belgium    | FreshwaterFish       | 2013 | kg |       |       | 6.58  |
| Belgium    | Honey                | 2013 | kg | 0.62  |       |       |
| Belgium    | MarineFishOther      | 2013 | kg |       |       | 0.66  |
| Belgium    | Milkwhole            | 2013 | kg |       | 67.55 |       |
| Belgium    | Pigmeat              | 2013 | kg | 38.65 |       |       |
| Belgium    | PoultryMeat          | 2013 | kg |       | 12.2  |       |
| Belize     | AquaticPlants        | 2013 | kg |       | 0     |       |
| Belize     | BovineMeat           | 2013 | kg |       | 4.86  |       |
| Belize     | ButterGhee           | 2013 | kg |       | 0.28  |       |
| Belize     | Cephalopods          | 2013 | kg |       | 0.03  |       |
| Belize     | Cheese               | 2013 | kg | 2.91  |       |       |
| Belize     | Cream                | 2013 | kg | 0.12  |       |       |
| Belize     | DemersalFish         | 2013 | kg |       |       | 1.45  |
| Belize     | Eggs                 | 2013 | kg | 4.85  |       |       |
| Belize     | FreshwaterFish       | 2013 | kg |       |       | 0.21  |
| Belize     | Honey                | 2013 | kg | 0.14  |       |       |
| Belize     | MarineFishOther      | 2013 | kg |       |       | 0.55  |
| Belize     | Milkwhole            | 2013 | kg |       | 36.96 |       |
| Belize     | Pigmeat              | 2013 | kg | 16.8  |       |       |
| Belize     | PoultryMeat          | 2013 | kg |       | 28.31 |       |
| Benin      | AquaticAnimalsOthers | 2013 | kg |       |       | 0     |
| Benin      | AquaticPlants        | 2013 | kg |       | 0     |       |
| Benin      | BovineMeat           | 2013 | kg |       | 3.05  |       |
| Benin      | ButterGhee           | 2013 | kg |       | 0.03  |       |
| Benin      | Cephalopods          | 2013 | kg |       | 0     |       |

|          |                      |      |    |        |       |      |
|----------|----------------------|------|----|--------|-------|------|
| Benin    | Cheese               | 2013 | kg | 0.04   |       |      |
| Benin    | Cream                | 2013 | kg | 0.02   |       |      |
| Benin    | DemersalFish         | 2013 | kg |        | 0.52  |      |
| Benin    | Eggs                 | 2013 | kg | 0.9    |       |      |
| Benin    | FreshwaterFish       | 2013 | kg |        | 2.64  |      |
| Benin    | Honey                | 2013 | kg | 0      |       |      |
| Benin    | MarineFishOther      | 2013 | kg |        | 8.51  |      |
| Benin    | Milkwhole            | 2013 | kg | 6.32   |       |      |
| Benin    | Pigmeat              | 2013 | kg | 0.8    |       |      |
| Benin    | PoultryMeat          | 2013 | kg |        | 19.65 |      |
| Bermuda  | AquaticPlants        | 2013 | kg |        | 0     |      |
| Bermuda  | BovineMeat           | 2013 | kg |        | 33.15 |      |
| Bermuda  | ButterGhee           | 2013 | kg |        | 3.02  |      |
| Bermuda  | Cephalopods          | 2013 | kg |        | 1.38  |      |
| Bermuda  | Cheese               | 2013 | kg | 6.98   |       |      |
| Bermuda  | Cream                | 2013 | kg | 0      |       |      |
| Bermuda  | DemersalFish         | 2013 | kg |        | 10.12 |      |
| Bermuda  | Eggs                 | 2013 | kg | 14.92  |       |      |
| Bermuda  | FreshwaterFish       | 2013 | kg |        | 4.84  |      |
| Bermuda  | Honey                | 2013 | kg | 0.74   |       |      |
| Bermuda  | MarineFishOther      | 2013 | kg |        | 9.78  |      |
| Bermuda  | Milkwhole            | 2013 | kg | 25.76  |       |      |
| Bermuda  | Pigmeat              | 2013 | kg | 28.24  |       |      |
| Bermuda  | PoultryMeat          | 2013 | kg |        | 32.62 |      |
| Bermuda  | Whey                 | 2013 | kg | 0.42   |       |      |
| Bolivia  | AquaticAnimalsOthers | 2013 | kg |        |       | 0    |
| Bolivia  | AquaticPlants        | 2013 | kg |        | 0     |      |
| Bolivia  | BovineMeat           | 2013 | kg |        | 19.78 |      |
| Bolivia  | ButterGhee           | 2013 | kg |        | 0.06  |      |
| Bolivia  | Cephalopods          | 2013 | kg |        | 0     |      |
| Bolivia  | Cheese               | 2013 | kg | 1.09   |       |      |
| Bolivia  | Cream                | 2013 | kg | 0.03   |       |      |
| Bolivia  | DemersalFish         | 2013 | kg |        | 0     |      |
| Bolivia  | Eggs                 | 2013 | kg | 5.18   |       |      |
| Bolivia  | FreshwaterFish       | 2013 | kg |        | 0.78  |      |
| Bolivia  | Honey                | 2013 | kg | 0.07   |       |      |
| Bolivia  | MarineFishOther      | 2013 | kg |        | 0.91  |      |
| Bolivia  | Milkwhole            | 2013 | kg | 38.72  |       |      |
| Bolivia  | Pigmeat              | 2013 | kg | 8.89   |       |      |
| Bolivia  | PoultryMeat          | 2013 | kg |        | 34.31 |      |
| BosniaH  | AquaticAnimalsOthers | 2013 | kg |        |       | 0    |
| BosniaH  | AquaticPlants        | 2013 | kg |        | 0     |      |
| BosniaH  | BovineMeat           | 2013 | kg |        | 9.12  |      |
| BosniaH  | ButterGhee           | 2013 | kg |        | 0.66  |      |
| BosniaH  | Cephalopods          | 2013 | kg |        | 0.17  |      |
| BosniaH  | Cheese               | 2013 | kg | 3.13   |       |      |
| BosniaH  | Cream                | 2013 | kg | 0.69   |       |      |
| BosniaH  | DemersalFish         | 2013 | kg |        | 0.97  |      |
| BosniaH  | Eggs                 | 2013 | kg | 4.49   |       |      |
| BosniaH  | FreshwaterFish       | 2013 | kg |        | 1.11  |      |
| BosniaH  | Honey                | 2013 | kg | 1.01   |       |      |
| BosniaH  | MarineFishOther      | 2013 | kg |        | 0.29  |      |
| BosniaH  | Milkwhole            | 2013 | kg | 142.92 |       |      |
| BosniaH  | Pigmeat              | 2013 | kg | 9.38   |       |      |
| BosniaH  | PoultryMeat          | 2013 | kg |        | 13.17 |      |
| Botswana | AquaticAnimalsOthers | 2013 | kg |        |       | 0    |
| Botswana | AquaticPlants        | 2013 | kg |        | 0     |      |
| Botswana | BovineMeat           | 2013 | kg |        | 7.85  |      |
| Botswana | ButterGhee           | 2013 | kg |        | 0.72  |      |
| Botswana | Cephalopods          | 2013 | kg |        | 0     |      |
| Botswana | Cheese               | 2013 | kg | 1.49   |       |      |
| Botswana | Cream                | 2013 | kg | 0.14   |       |      |
| Botswana | DemersalFish         | 2013 | kg |        | 0.48  |      |
| Botswana | Eggs                 | 2013 | kg | 1.95   |       |      |
| Botswana | FreshwaterFish       | 2013 | kg |        | 0.36  |      |
| Botswana | Honey                | 2013 | kg | 0.04   |       |      |
| Botswana | MarineFishOther      | 2013 | kg |        | 0.21  |      |
| Botswana | Milkwhole            | 2013 | kg | 103.61 |       |      |
| Botswana | Pigmeat              | 2013 | kg | 0.74   |       |      |
| Botswana | PoultryMeat          | 2013 | kg |        | 5.33  |      |
| Brazil   | AquaticAnimalsOthers | 2013 | kg |        |       | 0.01 |
| Brazil   | AquaticPlants        | 2013 | kg |        | 0     |      |
| Brazil   | BovineMeat           | 2013 | kg |        | 39.25 |      |
| Brazil   | ButterGhee           | 2013 | kg |        | 0.49  |      |
| Brazil   | Cephalopods          | 2013 | kg |        | 0.04  |      |
| Brazil   | Cheese               | 2013 | kg | 0.37   |       |      |
| Brazil   | Cream                | 2013 | kg | 0      |       |      |
| Brazil   | DemersalFish         | 2013 | kg |        | 3.36  |      |
| Brazil   | Eggs                 | 2013 | kg | 8.98   |       |      |
| Brazil   | FreshwaterFish       | 2013 | kg |        | 4.94  |      |
| Brazil   | Honey                | 2013 | kg | 0.09   |       |      |
| Brazil   | MarineFishOther      | 2013 | kg |        | 0.62  |      |
| Brazil   | Milkwhole            | 2013 | kg | 141.42 |       |      |
| Brazil   | Pigmeat              | 2013 | kg | 12.6   |       |      |
| Brazil   | PoultryMeat          | 2013 | kg |        | 45    |      |
| Brunei   | AquaticAnimalsOthers | 2013 | kg |        |       | 0.27 |

CoronaAnimalProd\_FoodSupply\_10Sept\_2020.sas

|             |                      |      |    |       |  |      |
|-------------|----------------------|------|----|-------|--|------|
| Brunei      | AquaticPlants        | 2013 | kg | 0     |  |      |
| Brunei      | BovineMeat           | 2013 | kg | 12.15 |  |      |
| Brunei      | ButterGhee           | 2013 | kg | 1.67  |  |      |
| Brunei      | Cephalopods          | 2013 | kg | 2.63  |  |      |
| Brunei      | Cheese               | 2013 | kg | 1.61  |  |      |
| Brunei      | Cream                | 2013 | kg | 0.72  |  |      |
| Brunei      | DemersalFish         | 2013 | kg | 3.15  |  |      |
| Brunei      | Eggs                 | 2013 | kg | 16.16 |  |      |
| Brunei      | FreshwaterFish       | 2013 | kg | 3.14  |  |      |
| Brunei      | Honey                | 2013 | kg | 0.32  |  |      |
| Brunei      | MarineFishOther      | 2013 | kg | 21.71 |  |      |
| Brunei      | Milkwhole            | 2013 | kg | 44.38 |  |      |
| Brunei      | Pigmeat              | 2013 | kg | 8.35  |  |      |
| Brunei      | PoultryMeat          | 2013 | kg | 62.87 |  |      |
| Bulgaria    | AquaticAnimalsOthers | 2013 | kg | 0     |  | 0.02 |
| Bulgaria    | AquaticPlants        | 2013 | kg | 0     |  |      |
| Bulgaria    | BovineMeat           | 2013 | kg | 3.84  |  |      |
| Bulgaria    | ButterGhee           | 2013 | kg | 0.75  |  |      |
| Bulgaria    | Cephalopods          | 2013 | kg | 0.1   |  |      |
| Bulgaria    | Cheese               | 2013 | kg | 9.59  |  |      |
| Bulgaria    | Cream                | 2013 | kg | 0.01  |  |      |
| Bulgaria    | DemersalFish         | 2013 | kg | 0.81  |  |      |
| Bulgaria    | Eggs                 | 2013 | kg | 8.36  |  |      |
| Bulgaria    | FreshwaterFish       | 2013 | kg | 2.6   |  |      |
| Bulgaria    | Honey                | 2013 | kg | 0     |  |      |
| Bulgaria    | MarineFishOther      | 2013 | kg | 0.13  |  |      |
| Bulgaria    | Milkwhole            | 2013 | kg | 78.95 |  |      |
| Bulgaria    | Pigmeat              | 2013 | kg | 26.26 |  |      |
| Bulgaria    | PoultryMeat          | 2013 | kg | 20.68 |  |      |
| Bulgaria    | whey                 | 2013 | kg | 0     |  |      |
| BurkinaFaso | AquaticPlants        | 2013 | kg | 0     |  |      |
| BurkinaFaso | BovineMeat           | 2013 | kg | 4.48  |  |      |
| BurkinaFaso | ButterGhee           | 2013 | kg | 0.09  |  |      |
| BurkinaFaso | Cephalopods          | 2013 | kg | 0     |  |      |
| BurkinaFaso | Cheese               | 2013 | kg | 0.01  |  |      |
| BurkinaFaso | Cream                | 2013 | kg | 0     |  |      |
| BurkinaFaso | DemersalFish         | 2013 | kg | 0     |  |      |
| BurkinaFaso | Eggs                 | 2013 | kg | 2.61  |  |      |
| BurkinaFaso | FreshwaterFish       | 2013 | kg | 1.04  |  |      |
| BurkinaFaso | Honey                | 2013 | kg | 0     |  |      |
| BurkinaFaso | MarineFishOther      | 2013 | kg | 2.93  |  |      |
| BurkinaFaso | Milkwhole            | 2013 | kg | 27.24 |  |      |
| BurkinaFaso | Pigmeat              | 2013 | kg | 1.93  |  |      |
| BurkinaFaso | PoultryMeat          | 2013 | kg | 2.26  |  |      |
| BurkinaFaso | whey                 | 2013 | kg | 0.05  |  |      |
| CaboVerde   | AquaticAnimalsOthers | 2013 | kg | 0     |  | 0    |
| CaboVerde   | AquaticPlants        | 2013 | kg | 0     |  |      |
| CaboVerde   | BovineMeat           | 2013 | kg | 2     |  |      |
| CaboVerde   | ButterGhee           | 2013 | kg | 0.17  |  |      |
| CaboVerde   | Cephalopods          | 2013 | kg | 0.26  |  |      |
| CaboVerde   | Cheese               | 2013 | kg | 1.24  |  |      |
| CaboVerde   | Cream                | 2013 | kg | 0     |  |      |
| CaboVerde   | DemersalFish         | 2013 | kg | 2.95  |  |      |
| CaboVerde   | Eggs                 | 2013 | kg | 5.08  |  |      |
| CaboVerde   | FreshwaterFish       | 2013 | kg | 0.04  |  |      |
| CaboVerde   | Honey                | 2013 | kg | 0.04  |  |      |
| CaboVerde   | MarineFishOther      | 2013 | kg | 1.73  |  |      |
| CaboVerde   | Milkwhole            | 2013 | kg | 95.58 |  |      |
| CaboVerde   | Pigmeat              | 2013 | kg | 12.04 |  |      |
| CaboVerde   | PoultryMeat          | 2013 | kg | 18.95 |  |      |
| CaboVerde   | whey                 | 2013 | kg | 0     |  |      |
| Cambodia    | AquaticAnimalsOthers | 2013 | kg | 0     |  | 0.01 |
| Cambodia    | AquaticPlants        | 2013 | kg | 0     |  |      |
| Cambodia    | BovineMeat           | 2013 | kg | 4.85  |  |      |
| Cambodia    | ButterGhee           | 2013 | kg | 0.03  |  |      |
| Cambodia    | Cephalopods          | 2013 | kg | 0.45  |  |      |
| Cambodia    | Cheese               | 2013 | kg | 0.02  |  |      |
| Cambodia    | Cream                | 2013 | kg | 0     |  |      |
| Cambodia    | DemersalFish         | 2013 | kg | 0.02  |  |      |
| Cambodia    | Eggs                 | 2013 | kg | 1.37  |  |      |
| Cambodia    | FreshwaterFish       | 2013 | kg | 34    |  |      |
| Cambodia    | Honey                | 2013 | kg | 0     |  |      |
| Cambodia    | MarineFishOther      | 2013 | kg | 5.46  |  |      |
| Cambodia    | Milkwhole            | 2013 | kg | 2.25  |  |      |
| Cambodia    | Pigmeat              | 2013 | kg | 6.52  |  |      |
| Cambodia    | PoultryMeat          | 2013 | kg | 1.84  |  |      |
| Cambodia    | whey                 | 2013 | kg | 0     |  |      |
| Cameroon    | AquaticAnimalsOthers | 2013 | kg | 0     |  | 0    |
| Cameroon    | AquaticPlants        | 2013 | kg | 0     |  |      |
| Cameroon    | BovineMeat           | 2013 | kg | 4.17  |  |      |
| Cameroon    | ButterGhee           | 2013 | kg | 0.01  |  |      |
| Cameroon    | Cephalopods          | 2013 | kg | 0     |  |      |
| Cameroon    | Cheese               | 2013 | kg | 0.02  |  |      |
| Cameroon    | Cream                | 2013 | kg | 0.01  |  |      |
| Cameroon    | DemersalFish         | 2013 | kg | 2.47  |  |      |
| Cameroon    | Eggs                 | 2013 | kg | 0.4   |  |      |

CoronaAnimalProd\_FoodSupply\_10Sept\_2020.sas

|                        |                      |      |    |       |  |  |
|------------------------|----------------------|------|----|-------|--|--|
| Cameroon               | FreshwaterFish       | 2013 | kg | 3.92  |  |  |
| Cameroon               | Honey                | 2013 | kg | 0.2   |  |  |
| Cameroon               | MarineFishOther      | 2013 | kg | 1.84  |  |  |
| Cameroon               | Milkwhole            | 2013 | kg | 14.87 |  |  |
| Cameroon               | Pigmeat              | 2013 | kg | 1.47  |  |  |
| Cameroon               | PoultryMeat          | 2013 | kg | 3.29  |  |  |
| Cameroon               | Whey                 | 2013 | kg | 0.06  |  |  |
| Canada                 | AquaticAnimalsOthers | 2013 | kg | 0.09  |  |  |
| Canada                 | AquaticPlants        | 2013 | kg | 0     |  |  |
| Canada                 | BovineMeat           | 2013 | kg | 30.25 |  |  |
| Canada                 | ButterGhee           | 2013 | kg | 2.7   |  |  |
| Canada                 | Cephalopods          | 2013 | kg | 0.06  |  |  |
| Canada                 | Cheese               | 2013 | kg | 12    |  |  |
| Canada                 | Cream                | 2013 | kg | 9.77  |  |  |
| Canada                 | DemersalFish         | 2013 | kg | 4.81  |  |  |
| Canada                 | Eggs                 | 2013 | kg | 12.95 |  |  |
| Canada                 | FreshwaterFish       | 2013 | kg | 5.08  |  |  |
| Canada                 | Honey                | 2013 | kg | 0.79  |  |  |
| Canada                 | MarineFishOther      | 2013 | kg | 0.15  |  |  |
| Canada                 | MeatAquaticMammals   | 2013 | kg | 0     |  |  |
| Canada                 | Milkwhole            | 2013 | kg | 21.19 |  |  |
| Canada                 | Pigmeat              | 2013 | kg | 22.81 |  |  |
| Canada                 | PoultryMeat          | 2013 | kg | 36.68 |  |  |
| Canada                 | whey                 | 2013 | kg | 9.19  |  |  |
| CentralAfricanRepublic | AquaticPlants        | 2013 | kg | 0     |  |  |
| CentralAfricanRepublic | BovineMeat           | 2013 | kg | 11.92 |  |  |
| CentralAfricanRepublic | ButterGhee           | 2013 | kg | 0     |  |  |
| CentralAfricanRepublic | Cephalopods          | 2013 | kg | 0     |  |  |
| CentralAfricanRepublic | Cheese               | 2013 | kg | 0     |  |  |
| CentralAfricanRepublic | Cream                | 2013 | kg | 0     |  |  |
| CentralAfricanRepublic | DemersalFish         | 2013 | kg | 0     |  |  |
| CentralAfricanRepublic | Eggs                 | 2013 | kg | 0.47  |  |  |
| CentralAfricanRepublic | FreshwaterFish       | 2013 | kg | 6.53  |  |  |
| CentralAfricanRepublic | Honey                | 2013 | kg | 3.51  |  |  |
| CentralAfricanRepublic | MarineFishOther      | 2013 | kg | 0.17  |  |  |
| CentralAfricanRepublic | Milkwhole            | 2013 | kg | 13.05 |  |  |
| CentralAfricanRepublic | Pigmeat              | 2013 | kg | 3.7   |  |  |
| CentralAfricanRepublic | PoultryMeat          | 2013 | kg | 1.45  |  |  |
| Chad                   | AquaticAnimalsOthers | 2013 | kg | 0     |  |  |
| Chad                   | BovineMeat           | 2013 | kg | 7.67  |  |  |
| Chad                   | ButterGhee           | 2013 | kg | 0.04  |  |  |
| Chad                   | Cephalopods          | 2013 | kg | 0     |  |  |
| Chad                   | Cheese               | 2013 | kg | 0     |  |  |
| Chad                   | DemersalFish         | 2013 | kg | 0     |  |  |
| Chad                   | Eggs                 | 2013 | kg | 0.24  |  |  |
| Chad                   | FreshwaterFish       | 2013 | kg | 4.67  |  |  |
| Chad                   | Honey                | 2013 | kg | 0.08  |  |  |
| Chad                   | MarineFishOther      | 2013 | kg | 0     |  |  |
| Chad                   | Milkwhole            | 2013 | kg | 20.47 |  |  |
| Chad                   | Pigmeat              | 2013 | kg | 0.05  |  |  |
| Chad                   | PoultryMeat          | 2013 | kg | 0.42  |  |  |
| Chile                  | AquaticAnimalsOthers | 2013 | kg | 0.72  |  |  |
| Chile                  | AquaticPlants        | 2013 | kg | 0     |  |  |
| Chile                  | BovineMeat           | 2013 | kg | 23.86 |  |  |
| Chile                  | ButterGhee           | 2013 | kg | 1.24  |  |  |
| Chile                  | Cephalopods          | 2013 | kg | 1.74  |  |  |
| Chile                  | Cheese               | 2013 | kg | 6.32  |  |  |
| Chile                  | Cream                | 2013 | kg | 0.07  |  |  |
| Chile                  | DemersalFish         | 2013 | kg | 3.31  |  |  |
| Chile                  | Eggs                 | 2013 | kg | 9.97  |  |  |
| Chile                  | FreshwaterFish       | 2013 | kg | 0.62  |  |  |
| Chile                  | Honey                | 2013 | kg | 0.16  |  |  |
| Chile                  | MarineFishOther      | 2013 | kg | 0.02  |  |  |
| Chile                  | MeatAquaticMammals   | 2013 | kg | 0     |  |  |
| Chile                  | Milkwhole            | 2013 | kg | 45.13 |  |  |
| Chile                  | Pigmeat              | 2013 | kg | 24.68 |  |  |
| Chile                  | PoultryMeat          | 2013 | kg | 36.52 |  |  |
| Chile                  | whey                 | 2013 | kg | 0.13  |  |  |
| HongKong               | AquaticAnimalsOthers | 2013 | kg | 0.34  |  |  |
| HongKong               | AquaticPlants        | 2013 | kg | 0     |  |  |
| HongKong               | BovineMeat           | 2013 | kg | 25.82 |  |  |
| HongKong               | ButterGhee           | 2013 | kg | 1.24  |  |  |
| HongKong               | Cephalopods          | 2013 | kg | 3.05  |  |  |
| HongKong               | Cheese               | 2013 | kg | 1.83  |  |  |
| HongKong               | Cream                | 2013 | kg | 0.19  |  |  |
| HongKong               | DemersalFish         | 2013 | kg | 7.42  |  |  |
| HongKong               | Eggs                 | 2013 | kg | 14.5  |  |  |
| HongKong               | FreshwaterFish       | 2013 | kg | 10.11 |  |  |
| HongKong               | Honey                | 2013 | kg | 0.41  |  |  |
| HongKong               | MarineFishOther      | 2013 | kg | 22.34 |  |  |
| HongKong               | Milkwhole            | 2013 | kg | 81.05 |  |  |
| HongKong               | Pigmeat              | 2013 | kg | 67.11 |  |  |
| HongKong               | PoultryMeat          | 2013 | kg | 54.86 |  |  |
| ChinaMacaoSAR          | AquaticAnimalsOthers | 2013 | kg | 0.21  |  |  |
| ChinaMacaoSAR          | AquaticPlants        | 2013 | kg | 0     |  |  |
| ChinaMacaoSAR          | BovineMeat           | 2013 | kg | 10.4  |  |  |

CoronaAnimalProd\_FoodSupply\_10Sept\_2020.sas

|                       |                      |      |    |        |  |      |  |
|-----------------------|----------------------|------|----|--------|--|------|--|
| ChinaMacaoSAR         | ButterGhee           | 2013 | kg | 0.87   |  |      |  |
| ChinaMacaoSAR         | Cephalopods          | 2013 | kg | 2.19   |  |      |  |
| ChinaMacaoSAR         | Cheese               | 2013 | kg | 0.96   |  |      |  |
| ChinaMacaoSAR         | Cream                | 2013 | kg | 1.24   |  |      |  |
| ChinaMacaoSAR         | DemersalFish         | 2013 | kg | 1.1    |  |      |  |
| ChinaMacaoSAR         | Eggs                 | 2013 | kg | 14.95  |  |      |  |
| ChinaMacaoSAR         | FreshwaterFish       | 2013 | kg | 12.8   |  |      |  |
| ChinaMacaoSAR         | Honey                | 2013 | kg | 0.14   |  |      |  |
| ChinaMacaoSAR         | MarineFishOther      | 2013 | kg | 17.48  |  |      |  |
| ChinaMacaoSAR         | Milkwhole            | 2013 | kg | 28.6   |  |      |  |
| ChinaMacaoSAR         | Pigmeat              | 2013 | kg | 71.48  |  |      |  |
| ChinaMacaoSAR         | PoultryMeat          | 2013 | kg | 36.26  |  |      |  |
| ChinaMacaoSAR         | Whey                 | 2013 | kg | 0      |  |      |  |
| China                 | AquaticAnimalsOthers | 2013 | kg | 0.68   |  |      |  |
| China                 | AquaticPlants        | 2013 | kg | 9.44   |  |      |  |
| China                 | BovineMeat           | 2013 | kg | 5.12   |  |      |  |
| China                 | ButterGhee           | 2013 | kg | 0.11   |  |      |  |
| China                 | Cephalopods          | 2013 | kg | 0.74   |  |      |  |
| China                 | Cheese               | 2013 | kg | 0.22   |  |      |  |
| China                 | Cream                | 2013 | kg | 0      |  |      |  |
| China                 | DemersalFish         | 2013 | kg | 3.37   |  |      |  |
| China                 | Eggs                 | 2013 | kg | 18.76  |  |      |  |
| China                 | FreshwaterFish       | 2013 | kg | 16.04  |  |      |  |
| China                 | Honey                | 2013 | kg | 0.24   |  |      |  |
| China                 | MarineFishOther      | 2013 | kg | 1.29   |  |      |  |
| China                 | Milkwhole            | 2013 | kg | 29.39  |  |      |  |
| China                 | Pigmeat              | 2013 | kg | 38.43  |  |      |  |
| China                 | PoultryMeat          | 2013 | kg | 13.2   |  |      |  |
| ChinaTaiwanProvinceof | AquaticAnimalsOthers | 2013 | kg | 0      |  | 0.4  |  |
| ChinaTaiwanProvinceof | AquaticPlants        | 2013 | kg | 0      |  |      |  |
| ChinaTaiwanProvinceof | BovineMeat           | 2013 | kg | 5.21   |  |      |  |
| ChinaTaiwanProvinceof | ButterGhee           | 2013 | kg | 0.74   |  |      |  |
| ChinaTaiwanProvinceof | Cephalopods          | 2013 | kg | 5.19   |  |      |  |
| ChinaTaiwanProvinceof | Cheese               | 2013 | kg | 0.97   |  |      |  |
| ChinaTaiwanProvinceof | Cream                | 2013 | kg | 0.3    |  |      |  |
| ChinaTaiwanProvinceof | DemersalFish         | 2013 | kg | 3.83   |  |      |  |
| ChinaTaiwanProvinceof | Eggs                 | 2013 | kg | 13.08  |  |      |  |
| ChinaTaiwanProvinceof | FreshwaterFish       | 2013 | kg | 7.3    |  |      |  |
| ChinaTaiwanProvinceof | Honey                | 2013 | kg | 0.72   |  |      |  |
| ChinaTaiwanProvinceof | MarineFishOther      | 2013 | kg | 3.09   |  |      |  |
| ChinaTaiwanProvinceof | Milkwhole            | 2013 | kg | 26.12  |  |      |  |
| ChinaTaiwanProvinceof | Pigmeat              | 2013 | kg | 39.37  |  |      |  |
| ChinaTaiwanProvinceof | PoultryMeat          | 2013 | kg | 32.13  |  |      |  |
| Colombia              | AquaticAnimalsOthers | 2013 | kg | 0      |  |      |  |
| Colombia              | AquaticPlants        | 2013 | kg | 0      |  |      |  |
| Colombia              | BovineMeat           | 2013 | kg | 16.36  |  |      |  |
| Colombia              | ButterGhee           | 2013 | kg | 0.43   |  |      |  |
| Colombia              | Cephalopods          | 2013 | kg | 0.09   |  |      |  |
| Colombia              | Cheese               | 2013 | kg | 1.24   |  |      |  |
| Colombia              | Cream                | 2013 | kg | 0.02   |  |      |  |
| Colombia              | DemersalFish         | 2013 | kg | 0.12   |  |      |  |
| Colombia              | Eggs                 | 2013 | kg | 10.78  |  |      |  |
| Colombia              | FreshwaterFish       | 2013 | kg | 3.14   |  |      |  |
| Colombia              | Honey                | 2013 | kg | 0.04   |  |      |  |
| Colombia              | MarineFishOther      | 2013 | kg | 0.15   |  |      |  |
| Colombia              | Milkwhole            | 2013 | kg | 99.26  |  |      |  |
| Colombia              | Pigmeat              | 2013 | kg | 6.51   |  |      |  |
| Colombia              | PoultryMeat          | 2013 | kg | 27.57  |  |      |  |
| Congo                 | AquaticAnimalsOthers | 2013 | kg | 0      |  | 0    |  |
| Congo                 | AquaticPlants        | 2013 | kg | 0      |  |      |  |
| Congo                 | BovineMeat           | 2013 | kg | 4.35   |  |      |  |
| Congo                 | ButterGhee           | 2013 | kg | 0.04   |  |      |  |
| Congo                 | Cephalopods          | 2013 | kg | 0.02   |  |      |  |
| Congo                 | Cheese               | 2013 | kg | 0.08   |  |      |  |
| Congo                 | Cream                | 2013 | kg | 0.02   |  |      |  |
| Congo                 | DemersalFish         | 2013 | kg | 7.77   |  |      |  |
| Congo                 | Eggs                 | 2013 | kg | 0.6    |  |      |  |
| Congo                 | FreshwaterFish       | 2013 | kg | 8.18   |  |      |  |
| Congo                 | Honey                | 2013 | kg | 0.01   |  |      |  |
| Congo                 | MarineFishOther      | 2013 | kg | 1.11   |  |      |  |
| Congo                 | Milkwhole            | 2013 | kg | 9.29   |  |      |  |
| Congo                 | Pigmeat              | 2013 | kg | 2.39   |  |      |  |
| Congo                 | PoultryMeat          | 2013 | kg | 13.02  |  |      |  |
| CostaRica             | AquaticAnimalsOthers | 2013 | kg | 0      |  | 0.02 |  |
| CostaRica             | AquaticPlants        | 2013 | kg | 0      |  |      |  |
| CostaRica             | BovineMeat           | 2013 | kg | 15.23  |  |      |  |
| CostaRica             | ButterGhee           | 2013 | kg | 1.33   |  |      |  |
| CostaRica             | Cephalopods          | 2013 | kg | 0.29   |  |      |  |
| CostaRica             | Cheese               | 2013 | kg | 2.97   |  |      |  |
| CostaRica             | DemersalFish         | 2013 | kg | 0.6    |  |      |  |
| CostaRica             | Eggs                 | 2013 | kg | 10.55  |  |      |  |
| CostaRica             | FreshwaterFish       | 2013 | kg | 5.97   |  |      |  |
| CostaRica             | Honey                | 2013 | kg | 0.26   |  |      |  |
| CostaRica             | MarineFishOther      | 2013 | kg | 0.6    |  |      |  |
| CostaRica             | Milkwhole            | 2013 | kg | 151.89 |  |      |  |
| CostaRica             | Pigmeat              | 2013 | kg | 10.28  |  |      |  |

|           |                      |      |    |        |  |
|-----------|----------------------|------|----|--------|--|
| CostaRica | PoultryMeat          | 2013 | kg | 24.47  |  |
| Ivorycote | AquaticAnimalsOthers | 2013 | kg | 0      |  |
| IvoryCoa  | AquaticPlants        | 2013 | kg | 0      |  |
| IvoryCoa  | BovineMeat           | 2013 | kg | 1.7    |  |
| IvoryCoa  | ButterGhee           | 2013 | kg | 0.02   |  |
| IvoryCoa  | Cephalopods          | 2013 | kg | 0      |  |
| IvoryCoa  | Cheese               | 2013 | kg | 0.04   |  |
| IvoryCoa  | Cream                | 2013 | kg | 0.06   |  |
| IvoryCoa  | DemersalFish         | 2013 | kg | 0.33   |  |
| IvoryCoa  | Eggs                 | 2013 | kg | 1.95   |  |
| IvoryCoa  | FreshwaterFish       | 2013 | kg | 0.54   |  |
| IvoryCoa  | Honey                | 2013 | kg | 0.03   |  |
| IvoryCoa  | MarineFishOther      | 2013 | kg | 8.01   |  |
| IvoryCoa  | Milkwhole            | 2013 | kg | 5.28   |  |
| IvoryCoa  | Pigmeat              | 2013 | kg | 1.76   |  |
| IvoryCoa  | PoultryMeat          | 2013 | kg | 2.4    |  |
| IvoryCoa  | Whey                 | 2013 | kg | 0.91   |  |
| Croatia   | AquaticAnimalsOthers | 2013 | kg | 0.08   |  |
| Croatia   | AquaticPlants        | 2013 | kg | 0      |  |
| Croatia   | BovineMeat           | 2013 | kg | 12.41  |  |
| Croatia   | ButterGhee           | 2013 | kg | 1.19   |  |
| Croatia   | Cephalopods          | 2013 | kg | 1.87   |  |
| Croatia   | Cheese               | 2013 | kg | 10.4   |  |
| Croatia   | Cream                | 2013 | kg | 0      |  |
| Croatia   | DemersalFish         | 2013 | kg | 3.7    |  |
| Croatia   | Eggs                 | 2013 | kg | 8.48   |  |
| Croatia   | FreshwaterFish       | 2013 | kg | 1.39   |  |
| Croatia   | Honey                | 2013 | kg | 0.7    |  |
| Croatia   | MarineFishOther      | 2013 | kg | 1.26   |  |
| Croatia   | Milkwhole            | 2013 | kg | 113.76 |  |
| Croatia   | Pigmeat              | 2013 | kg | 42.79  |  |
| Croatia   | PoultryMeat          | 2013 | kg | 8.52   |  |
| Cuba      | AquaticAnimalsOthers | 2013 | kg | 0      |  |
| Cuba      | AquaticPlants        | 2013 | kg | 0      |  |
| Cuba      | BovineMeat           | 2013 | kg | 6.39   |  |
| Cuba      | ButterGhee           | 2013 | kg | 0.26   |  |
| Cuba      | Cephalopods          | 2013 | kg | 0.05   |  |
| Cuba      | Cheese               | 2013 | kg | 1.47   |  |
| Cuba      | Cream                | 2013 | kg | 0      |  |
| Cuba      | DemersalFish         | 2013 | kg | 0.89   |  |
| Cuba      | Eggs                 | 2013 | kg | 9.82   |  |
| Cuba      | FreshwaterFish       | 2013 | kg | 2.37   |  |
| Cuba      | Honey                | 2013 | kg | 0.13   |  |
| Cuba      | MarineFishOther      | 2013 | kg | 0.34   |  |
| Cuba      | Milkwhole            | 2013 | kg | 74.94  |  |
| Cuba      | Pigmeat              | 2013 | kg | 19.82  |  |
| Cuba      | PoultryMeat          | 2013 | kg | 20.15  |  |
| Cuba      | Whey                 | 2013 | kg | 0      |  |
| Cyprus    | AquaticAnimalsOthers | 2013 | kg | 0.19   |  |
| Cyprus    | AquaticPlants        | 2013 | kg | 0      |  |
| Cyprus    | BovineMeat           | 2013 | kg | 5.79   |  |
| Cyprus    | ButterGhee           | 2013 | kg | 0.94   |  |
| Cyprus    | Cephalopods          | 2013 | kg | 3.1    |  |
| Cyprus    | Cheese               | 2013 | kg | 3.35   |  |
| Cyprus    | Cream                | 2013 | kg | 0      |  |
| Cyprus    | DemersalFish         | 2013 | kg | 4.33   |  |
| Cyprus    | Eggs                 | 2013 | kg | 8.98   |  |
| Cyprus    | FreshwaterFish       | 2013 | kg | 5.76   |  |
| Cyprus    | Honey                | 2013 | kg | 0.61   |  |
| Cyprus    | MarineFishOther      | 2013 | kg | 0.61   |  |
| Cyprus    | Milkwhole            | 2013 | kg | 83.55  |  |
| Cyprus    | Pigmeat              | 2013 | kg | 38.38  |  |
| Cyprus    | PoultryMeat          | 2013 | kg | 24.45  |  |
| Czechia   | AquaticAnimalsOthers | 2013 | kg | 0      |  |
| Czechia   | AquaticPlants        | 2013 | kg | 0      |  |
| Czechia   | BovineMeat           | 2013 | kg | 8.15   |  |
| Czechia   | ButterGhee           | 2013 | kg | 5.15   |  |
| Czechia   | Cephalopods          | 2013 | kg | 0.03   |  |
| Czechia   | Cheese               | 2013 | kg | 16.14  |  |
| Czechia   | Cream                | 2013 | kg | 4.06   |  |
| Czechia   | DemersalFish         | 2013 | kg | 2.06   |  |
| Czechia   | Eggs                 | 2013 | kg | 11.66  |  |
| Czechia   | FreshwaterFish       | 2013 | kg | 2.96   |  |
| Czechia   | Honey                | 2013 | kg | 0.8    |  |
| Czechia   | MarineFishOther      | 2013 | kg | 0.56   |  |
| Czechia   | Milkwhole            | 2013 | kg | 31.71  |  |
| Czechia   | Pigmeat              | 2013 | kg | 41.17  |  |
| Czechia   | PoultryMeat          | 2013 | kg | 19.09  |  |
| Nkorea    | AquaticAnimalsOthers | 2013 | kg | 0.01   |  |
| Nkorea    | AquaticPlants        | 2013 | kg | 0      |  |
| Nkorea    | BovineMeat           | 2013 | kg | 0.88   |  |
| Nkorea    | ButterGhee           | 2013 | kg | 0.01   |  |
| Nkorea    | Cephalopods          | 2013 | kg | 0.43   |  |
| Nkorea    | DemersalFish         | 2013 | kg | 3.51   |  |
| Nkorea    | Eggs                 | 2013 | kg | 4.68   |  |
| Nkorea    | FreshwaterFish       | 2013 | kg | 0.38   |  |



|          |                      |      |    |       |      |
|----------|----------------------|------|----|-------|------|
| Nkorea   | MarineFishOther      | 2013 | kg | 4.08  |      |
| Nkorea   | Milkwhole            | 2013 | kg | 3.74  |      |
| Nkorea   | Pigmeat              | 2013 | kg | 4.7   |      |
| Nkorea   | PoultryMeat          | 2013 | kg | 1.76  |      |
| Denmark  | AquaticAnimalsothers | 2013 | kg |       | 0.02 |
| Denmark  | AquaticPlants        | 2013 | kg | 0     |      |
| Denmark  | BovineMeat           | 2013 | kg | 28.46 |      |
| Denmark  | ButterGhee           | 2013 | kg | 1.78  |      |
| Denmark  | Cephalopods          | 2013 | kg | 0.05  |      |
| Denmark  | Cheese               | 2013 | kg | 19.83 |      |
| Denmark  | Cream                | 2013 | kg | 9.14  |      |
| Denmark  | DemersalFish         | 2013 | kg | 5.06  |      |
| Denmark  | Eggs                 | 2013 | kg | 15.35 |      |
| Denmark  | FreshwaterFish       | 2013 | kg | 0.75  |      |
| Denmark  | Honey                | 2013 | kg | 0.71  |      |
| Denmark  | MarineFishOther      | 2013 | kg | 0.06  |      |
| Denmark  | Milkwhole            | 2013 | kg | 47.65 |      |
| Denmark  | Pigmeat              | 2013 | kg | 24.87 |      |
| Denmark  | PoultryMeat          | 2013 | kg | 26.75 |      |
| Denmark  | Whey                 | 2013 | kg | 9.09  |      |
| Djibouti | AquaticAnimalsothers | 2013 | kg |       | 0    |
| Djibouti | AquaticPlants        | 2013 | kg | 0     |      |
| Djibouti | BovineMeat           | 2013 | kg | 10    |      |
| Djibouti | ButterGhee           | 2013 | kg | 0.12  |      |
| Djibouti | Cephalopods          | 2013 | kg | 0     |      |
| Djibouti | Cheese               | 2013 | kg | 0.16  |      |
| Djibouti | Cream                | 2013 | kg | 0.04  |      |
| Djibouti | DemersalFish         | 2013 | kg | 0.64  |      |
| Djibouti | Eggs                 | 2013 | kg | 0.7   |      |
| Djibouti | FreshwaterFish       | 2013 | kg | 0.01  |      |
| Djibouti | Honey                | 2013 | kg | 0.02  |      |
| Djibouti | MarineFishOther      | 2013 | kg | 0.39  |      |
| Djibouti | Milkwhole            | 2013 | kg | 58.72 |      |
| Djibouti | Pigmeat              | 2013 | kg | 0.17  |      |
| Djibouti | PoultryMeat          | 2013 | kg | 2.05  |      |
| Dominica | AquaticAnimalsothers | 2013 | kg |       | 0    |
| Dominica | AquaticPlants        | 2013 | kg | 0     |      |
| Dominica | BovineMeat           | 2013 | kg | 8.72  |      |
| Dominica | ButterGhee           | 2013 | kg | 0.07  |      |
| Dominica | Cephalopods          | 2013 | kg | 0.01  |      |
| Dominica | Cheese               | 2013 | kg | 3.16  |      |
| Dominica | Cream                | 2013 | kg | 0.08  |      |
| Dominica | DemersalFish         | 2013 | kg | 3.87  |      |
| Dominica | Eggs                 | 2013 | kg | 2.53  |      |
| Dominica | FreshwaterFish       | 2013 | kg | 0.12  |      |
| Dominica | Honey                | 2013 | kg | 0     |      |
| Dominica | MarineFishOther      | 2013 | kg | 3.39  |      |
| Dominica | Milkwhole            | 2013 | kg | 88.33 |      |
| Dominica | Pigmeat              | 2013 | kg | 10.88 |      |
| Dominica | PoultryMeat          | 2013 | kg | 31.2  |      |
| Dominica | Whey                 | 2013 | kg | 0     |      |
| Dominr   | AquaticAnimalsothers | 2013 | kg |       | 0    |
| Dominr   | AquaticPlants        | 2013 | kg | 0     |      |
| Dominr   | BovineMeat           | 2013 | kg | 9.88  |      |
| Dominr   | ButterGhee           | 2013 | kg | 0.27  |      |
| Dominr   | Cephalopods          | 2013 | kg | 0.1   |      |
| Dominr   | Cheese               | 2013 | kg | 1.07  |      |
| Dominr   | DemersalFish         | 2013 | kg | 3.22  |      |
| Dominr   | Eggs                 | 2013 | kg | 7.19  |      |
| Dominr   | FreshwaterFish       | 2013 | kg | 0.34  |      |
| Dominr   | Honey                | 2013 | kg | 0.42  |      |
| Dominr   | MarineFishOther      | 2013 | kg | 0.44  |      |
| Dominr   | Milkwhole            | 2013 | kg | 53.73 |      |
| Dominr   | Pigmeat              | 2013 | kg | 9.51  |      |
| Dominr   | PoultryMeat          | 2013 | kg | 27.56 |      |
| Ecuador  | AquaticAnimalsothers | 2013 | kg |       | 0    |
| Ecuador  | AquaticPlants        | 2013 | kg | 0     |      |
| Ecuador  | BovineMeat           | 2013 | kg | 16.61 |      |
| Ecuador  | ButterGhee           | 2013 | kg | 0.15  |      |
| Ecuador  | Cephalopods          | 2013 | kg | 0.02  |      |
| Ecuador  | Cheese               | 2013 | kg | 6.19  |      |
| Ecuador  | Cream                | 2013 | kg | 0.19  |      |
| Ecuador  | DemersalFish         | 2013 | kg | 0.3   |      |
| Ecuador  | Eggs                 | 2013 | kg | 8.01  |      |
| Ecuador  | FreshwaterFish       | 2013 | kg | 1.49  |      |
| Ecuador  | Honey                | 2013 | kg | 0.07  |      |
| Ecuador  | MarineFishOther      | 2013 | kg | 0.3   |      |
| Ecuador  | Milkwhole            | 2013 | kg | 92.08 |      |
| Ecuador  | Pigmeat              | 2013 | kg | 14.44 |      |
| Ecuador  | PoultryMeat          | 2013 | kg | 21.85 |      |
| Ecuador  | whey                 | 2013 | kg | 0.03  |      |
| Egypt    | AquaticAnimalsothers | 2013 | kg |       | 0    |
| Egypt    | AquaticPlants        | 2013 | kg | 0     |      |
| Egypt    | BovineMeat           | 2013 | kg | 12.88 |      |
| Egypt    | ButterGhee           | 2013 | kg | 1.96  |      |
| Egypt    | Cephalopods          | 2013 | kg | 0.15  |      |

CoronaAnimalProd\_FoodSupply\_10Sept\_2020.sas

|            |                      |      |    |        |       |      |
|------------|----------------------|------|----|--------|-------|------|
| Egypt      | Cheese               | 2013 | kg | 6.91   |       |      |
| Egypt      | Cream                | 2013 | kg | 0.04   |       |      |
| Egypt      | DemersalFish         | 2013 | kg |        | 3.64  |      |
| Egypt      | Eggs                 | 2013 | kg | 4.59   |       |      |
| Egypt      | FreshwaterFish       | 2013 | kg |        | 13.92 |      |
| Egypt      | Honey                | 2013 | kg | 0.05   |       |      |
| Egypt      | MarineFishOther      | 2013 | kg |        | 0.32  |      |
| Egypt      | Milkwhole            | 2013 | kg | 21.52  |       |      |
| Egypt      | Pigmeat              | 2013 | kg | 0.02   |       |      |
| Egypt      | PoultryMeat          | 2013 | kg |        | 14.43 |      |
| Egypt      | whey                 | 2013 | kg | 2.6    |       |      |
| ElSalvador | AquaticAnimalsOthers | 2013 | kg |        |       | 0    |
| ElSalvador | AquaticPlants        | 2013 | kg |        |       | 0    |
| ElSalvador | BovineMeat           | 2013 | kg |        | 5.95  |      |
| ElSalvador | ButterGhee           | 2013 | kg |        | 0.09  |      |
| ElSalvador | Cephalopods          | 2013 | kg |        | 0.03  |      |
| ElSalvador | Cheese               | 2013 | kg | 5.19   |       |      |
| ElSalvador | Cream                | 2013 | kg | 0.01   |       |      |
| ElSalvador | DemersalFish         | 2013 | kg |        | 0.01  |      |
| ElSalvador | Eggs                 | 2013 | kg | 9.51   |       |      |
| ElSalvador | FreshwaterFish       | 2013 | kg |        | 0.97  |      |
| ElSalvador | Honey                | 2013 | kg | 0.01   |       |      |
| ElSalvador | MarineFishOther      | 2013 | kg |        | 2.14  |      |
| ElSalvador | Milkwhole            | 2013 | kg | 78.44  |       |      |
| ElSalvador | Pigmeat              | 2013 | kg | 3.23   |       |      |
| ElSalvador | PoultryMeat          | 2013 | kg |        | 19.84 |      |
| Estonia    | AquaticAnimalsOthers | 2013 | kg |        |       | 0    |
| Estonia    | AquaticPlants        | 2013 | kg |        |       | 0    |
| Estonia    | BovineMeat           | 2013 | kg |        | 7.19  |      |
| Estonia    | ButterGhee           | 2013 | kg |        | 1.63  |      |
| Estonia    | Cephalopods          | 2013 | kg |        | 0.4   |      |
| Estonia    | Cheese               | 2013 | kg | 7.98   |       |      |
| Estonia    | Cream                | 2013 | kg | 1.74   |       |      |
| Estonia    | DemersalFish         | 2013 | kg |        | 7.37  |      |
| Estonia    | Eggs                 | 2013 | kg | 12.66  |       |      |
| Estonia    | FreshwaterFish       | 2013 | kg |        | 2.59  |      |
| Estonia    | Honey                | 2013 | kg | 0.9    |       |      |
| Estonia    | MarineFishOther      | 2013 | kg |        | 0.05  |      |
| Estonia    | Milkwhole            | 2013 | kg | 165.8  |       |      |
| Estonia    | Pigmeat              | 2013 | kg | 29.68  |       |      |
| Estonia    | PoultryMeat          | 2013 | kg | 21.11  |       |      |
| Ethiopia   | AquaticPlants        | 2013 | kg |        |       | 0    |
| Ethiopia   | BovineMeat           | 2013 | kg |        | 3.61  |      |
| Ethiopia   | ButterGhee           | 2013 | kg |        | 0.19  |      |
| Ethiopia   | Cephalopods          | 2013 | kg |        | 0     |      |
| Ethiopia   | Cheese               | 2013 | kg | 0.06   |       |      |
| Ethiopia   | Cream                | 2013 | kg | 0      |       |      |
| Ethiopia   | DemersalFish         | 2013 | kg |        | 0     |      |
| Ethiopia   | Eggs                 | 2013 | kg | 0.36   |       |      |
| Ethiopia   | FreshwaterFish       | 2013 | kg |        | 0.23  |      |
| Ethiopia   | Honey                | 2013 | kg | 0.47   |       |      |
| Ethiopia   | MarineFishOther      | 2013 | kg |        | 0     |      |
| Ethiopia   | Milkwhole            | 2013 | kg | 40.01  |       |      |
| Ethiopia   | Pigmeat              | 2013 | kg | 0.02   |       |      |
| Ethiopia   | PoultryMeat          | 2013 | kg |        | 0.66  |      |
| Fiji       | AquaticAnimalsOthers | 2013 | kg |        |       | 0.24 |
| Fiji       | AquaticPlants        | 2013 | kg |        |       | 0    |
| Fiji       | BovineMeat           | 2013 | kg |        | 8.96  |      |
| Fiji       | ButterGhee           | 2013 | kg |        | 4.52  |      |
| Fiji       | Cephalopods          | 2013 | kg |        | 0.12  |      |
| Fiji       | Cheese               | 2013 | kg | 0.58   |       |      |
| Fiji       | Cream                | 2013 | kg | 0.04   |       |      |
| Fiji       | DemersalFish         | 2013 | kg |        | 3.71  |      |
| Fiji       | Eggs                 | 2013 | kg | 6.44   |       |      |
| Fiji       | FreshwaterFish       | 2013 | kg |        | 1.13  |      |
| Fiji       | Honey                | 2013 | kg | 0.45   |       |      |
| Fiji       | MarineFishOther      | 2013 | kg |        | 7.3   |      |
| Fiji       | Milkwhole            | 2013 | kg | 32.6   |       |      |
| Fiji       | Pigmeat              | 2013 | kg | 4.31   |       |      |
| Fiji       | PoultryMeat          | 2013 | kg |        | 20.26 |      |
| Fiji       | whey                 | 2013 | kg | 1.29   |       |      |
| Finland    | AquaticAnimalsOthers | 2013 | kg |        |       | 0.02 |
| Finland    | AquaticPlants        | 2013 | kg |        |       | 0    |
| Finland    | BovineMeat           | 2013 | kg |        | 19.22 |      |
| Finland    | ButterGhee           | 2013 | kg |        | 5     |      |
| Finland    | Cephalopods          | 2013 | kg |        | 0.02  |      |
| Finland    | Cheese               | 2013 | kg | 23.1   |       |      |
| Finland    | Cream                | 2013 | kg | 5.76   |       |      |
| Finland    | DemersalFish         | 2013 | kg |        | 3.08  |      |
| Finland    | Eggs                 | 2013 | kg | 9.55   |       |      |
| Finland    | FreshwaterFish       | 2013 | kg |        | 15.32 |      |
| Finland    | Honey                | 2013 | kg | 0.56   |       |      |
| Finland    | MarineFishOther      | 2013 | kg |        | 1.77  |      |
| Finland    | Milkwhole            | 2013 | kg | 113.15 |       |      |
| Finland    | Pigmeat              | 2013 | kg | 36.14  |       |      |
| Finland    | PoultryMeat          | 2013 | kg |        | 19.87 |      |

CoronaAnimalProd\_FoodSupply\_10Sept\_2020.sas

|                 |                      |      |    |        |      |  |
|-----------------|----------------------|------|----|--------|------|--|
| France          | AquaticAnimalsOthers | 2013 | kg | 0.07   |      |  |
| France          | AquaticPlants        | 2013 | kg | 0      |      |  |
| France          | BovineMeat           | 2013 | kg | 23.81  |      |  |
| France          | ButterGhee           | 2013 | kg | 7.98   |      |  |
| France          | Cephalopods          | 2013 | kg | 0.48   |      |  |
| France          | Cheese               | 2013 | kg | 23.66  |      |  |
| France          | Cream                | 2013 | kg | 4      |      |  |
| France          | DemersalFish         | 2013 | kg | 11.6   |      |  |
| France          | Eggs                 | 2013 | kg | 13.13  |      |  |
| France          | FreshwaterFish       | 2013 | kg | 4.24   |      |  |
| France          | Honey                | 2013 | kg | 0.55   |      |  |
| France          | MarineFishOther      | 2013 | kg | 0.18   |      |  |
| France          | Milkwhole            | 2013 | kg | 40.51  |      |  |
| France          | Pigmeat              | 2013 | kg | 33.05  |      |  |
| France          | PoultryMeat          | 2013 | kg | 22.93  |      |  |
| France          | whey                 | 2013 | kg | 0.06   |      |  |
| FrenchPolynesia | AquaticAnimalsOthers | 2013 | kg | 0      | 1.63 |  |
| FrenchPolynesia | AquaticPlants        | 2013 | kg | 0      |      |  |
| FrenchPolynesia | BovineMeat           | 2013 | kg | 30.9   |      |  |
| FrenchPolynesia | ButterGhee           | 2013 | kg | 4.28   |      |  |
| FrenchPolynesia | Cephalopods          | 2013 | kg | 0.12   |      |  |
| FrenchPolynesia | Cheese               | 2013 | kg | 5.42   |      |  |
| FrenchPolynesia | Cream                | 2013 | kg | 4.73   |      |  |
| FrenchPolynesia | DemersalFish         | 2013 | kg | 0.47   |      |  |
| FrenchPolynesia | Eggs                 | 2013 | kg | 8.75   |      |  |
| FrenchPolynesia | FreshwaterFish       | 2013 | kg | 2.01   |      |  |
| FrenchPolynesia | Honey                | 2013 | kg | 0.42   |      |  |
| FrenchPolynesia | MarineFishOther      | 2013 | kg | 12.11  |      |  |
| FrenchPolynesia | Milkwhole            | 2013 | kg | 52.33  |      |  |
| FrenchPolynesia | Pigmeat              | 2013 | kg | 14.75  |      |  |
| FrenchPolynesia | PoultryMeat          | 2013 | kg | 49.55  |      |  |
| FrenchPolynesia | whey                 | 2013 | kg | 0      |      |  |
| Gabon           | AquaticAnimalsOthers | 2013 | kg | 0      |      |  |
| Gabon           | AquaticPlants        | 2013 | kg | 0      |      |  |
| Gabon           | BovineMeat           | 2013 | kg | 8.6    |      |  |
| Gabon           | ButterGhee           | 2013 | kg | 0.23   |      |  |
| Gabon           | Cephalopods          | 2013 | kg | 0.17   |      |  |
| Gabon           | Cheese               | 2013 | kg | 0.5    |      |  |
| Gabon           | Cream                | 2013 | kg | 0.13   |      |  |
| Gabon           | DemersalFish         | 2013 | kg | 5.23   |      |  |
| Gabon           | Eggs                 | 2013 | kg | 1.22   |      |  |
| Gabon           | FreshwaterFish       | 2013 | kg | 6.5    |      |  |
| Gabon           | Honey                | 2013 | kg | 0.01   |      |  |
| Gabon           | MarineFishOther      | 2013 | kg | 5.76   |      |  |
| Gabon           | Milkwhole            | 2013 | kg | 23.14  |      |  |
| Gabon           | Pigmeat              | 2013 | kg | 10.36  |      |  |
| Gabon           | PoultryMeat          | 2013 | kg | 33     |      |  |
| Gabon           | whey                 | 2013 | kg | 0      |      |  |
| Gambia          | BovineMeat           | 2013 | kg | 2.16   |      |  |
| Gambia          | ButterGhee           | 2013 | kg | 0.1    |      |  |
| Gambia          | Cephalopods          | 2013 | kg | 0.05   |      |  |
| Gambia          | Cheese               | 2013 | kg | 0.06   |      |  |
| Gambia          | Cream                | 2013 | kg | 0.19   |      |  |
| Gambia          | DemersalFish         | 2013 | kg | 7.4    |      |  |
| Gambia          | Eggs                 | 2013 | kg | 0.99   |      |  |
| Gambia          | FreshwaterFish       | 2013 | kg | 2.44   |      |  |
| Gambia          | Honey                | 2013 | kg | 0      |      |  |
| Gambia          | MarineFishOther      | 2013 | kg | 1.14   |      |  |
| Gambia          | Milkwhole            | 2013 | kg | 44.98  |      |  |
| Gambia          | Pigmeat              | 2013 | kg | 0.18   |      |  |
| Gambia          | PoultryMeat          | 2013 | kg | 2.66   |      |  |
| Gambia          | whey                 | 2013 | kg | 0      |      |  |
| Georgia         | AquaticAnimalsOthers | 2013 | kg | 0      |      |  |
| Georgia         | AquaticPlants        | 2013 | kg | 0      |      |  |
| Georgia         | BovineMeat           | 2013 | kg | 6.04   |      |  |
| Georgia         | ButterGhee           | 2013 | kg | 0.55   |      |  |
| Georgia         | Cephalopods          | 2013 | kg | 0      |      |  |
| Georgia         | Cheese               | 2013 | kg | 0.32   |      |  |
| Georgia         | Cream                | 2013 | kg | 0.05   |      |  |
| Georgia         | DemersalFish         | 2013 | kg | 0.42   |      |  |
| Georgia         | Eggs                 | 2013 | kg | 6.12   |      |  |
| Georgia         | FreshwaterFish       | 2013 | kg | 0.48   |      |  |
| Georgia         | Honey                | 2013 | kg | 0.9    |      |  |
| Georgia         | MarineFishOther      | 2013 | kg | 2.79   |      |  |
| Georgia         | Milkwhole            | 2013 | kg | 144.04 |      |  |
| Georgia         | Pigmeat              | 2013 | kg | 8.93   |      |  |
| Georgia         | PoultryMeat          | 2013 | kg | 12.28  |      |  |
| Germany         | AquaticAnimalsOthers | 2013 | kg | 0      |      |  |
| Germany         | AquaticPlants        | 2013 | kg | 0      |      |  |
| Germany         | BovineMeat           | 2013 | kg | 13.16  |      |  |
| Germany         | ButterGhee           | 2013 | kg | 5.16   |      |  |
| Germany         | Cephalopods          | 2013 | kg | 0.22   |      |  |
| Germany         | Cheese               | 2013 | kg | 21.69  |      |  |
| Germany         | Cream                | 2013 | kg | 6.32   |      |  |
| Germany         | DemersalFish         | 2013 | kg | 4.09   |      |  |
| Germany         | Eggs                 | 2013 | kg | 12.2   |      |  |

|               |                      |      |    |       |      |
|---------------|----------------------|------|----|-------|------|
| Germany       | FreshwaterFish       | 2013 | kg | 4.25  |      |
| Germany       | Honey                | 2013 | kg | 1.04  |      |
| Germany       | MarineFishOther      | 2013 | kg | 0.36  |      |
| Germany       | Milkwhole            | 2013 | kg | 70.64 |      |
| Germany       | Pigmeat              | 2013 | kg | 51.81 |      |
| Germany       | PoultryMeat          | 2013 | kg | 17.75 |      |
| Ghana         | AquaticAnimalsOthers | 2013 | kg | 0     |      |
| Ghana         | AquaticPlants        | 2013 | kg | 0     |      |
| Ghana         | BovineMeat           | 2013 | kg | 1.09  |      |
| Ghana         | ButterGhee           | 2013 | kg | 0.07  |      |
| Ghana         | Cephalopods          | 2013 | kg | 0.1   |      |
| Ghana         | Cheese               | 2013 | kg | 0.03  |      |
| Ghana         | Cream                | 2013 | kg | 0     |      |
| Ghana         | DemersalFish         | 2013 | kg | 1.48  |      |
| Ghana         | Eggs                 | 2013 | kg | 1.21  |      |
| Ghana         | FreshwaterFish       | 2013 | kg | 4.86  |      |
| Ghana         | Honey                | 2013 | kg | 0     |      |
| Ghana         | MarineFishOther      | 2013 | kg | 0.33  |      |
| Ghana         | Milkwhole            | 2013 | kg | 3.17  |      |
| Ghana         | Pigmeat              | 2013 | kg | 1.36  |      |
| Ghana         | PoultryMeat          | 2013 | kg | 8.63  |      |
| Ghana         | whey                 | 2013 | kg | 2.27  |      |
| Greece        | AquaticAnimalsOthers | 2013 | kg | 0     | 0.01 |
| Greece        | AquaticPlants        | 2013 | kg | 0     |      |
| Greece        | BovineMeat           | 2013 | kg | 16.1  |      |
| Greece        | ButterGhee           | 2013 | kg | 1.05  |      |
| Greece        | Cephalopods          | 2013 | kg | 2.66  |      |
| Greece        | Cheese               | 2013 | kg | 25.47 |      |
| Greece        | Cream                | 2013 | kg | 2.47  |      |
| Greece        | DemersalFish         | 2013 | kg | 8.8   |      |
| Greece        | Eggs                 | 2013 | kg | 10.13 |      |
| Greece        | FreshwaterFish       | 2013 | kg | 2     |      |
| Greece        | Honey                | 2013 | kg | 1.55  |      |
| Greece        | MarineFishOther      | 2013 | kg | 0.43  |      |
| Greece        | Milkwhole            | 2013 | kg | 75.52 |      |
| Greece        | Pigmeat              | 2013 | kg | 28.31 |      |
| Greece        | PoultryMeat          | 2013 | kg | 15.74 |      |
| Grenada       | AquaticAnimalsOthers | 2013 | kg | 0     | 0.01 |
| Grenada       | AquaticPlants        | 2013 | kg | 0     |      |
| Grenada       | BovineMeat           | 2013 | kg | 3.46  |      |
| Grenada       | ButterGhee           | 2013 | kg | 0.28  |      |
| Grenada       | Cephalopods          | 2013 | kg | 0     |      |
| Grenada       | Cheese               | 2013 | kg | 3.73  |      |
| Grenada       | Cream                | 2013 | kg | 0.24  |      |
| Grenada       | DemersalFish         | 2013 | kg | 7.39  |      |
| Grenada       | Eggs                 | 2013 | kg | 10.34 |      |
| Grenada       | FreshwaterFish       | 2013 | kg | 0     |      |
| Grenada       | MarineFishOther      | 2013 | kg | 2.73  |      |
| Grenada       | Milkwhole            | 2013 | kg | 48.32 |      |
| Grenada       | Pigmeat              | 2013 | kg | 11.52 |      |
| Grenada       | PoultryMeat          | 2013 | kg | 43.51 |      |
| Guatemala     | AquaticPlants        | 2013 | kg | 0     |      |
| Guatemala     | BovineMeat           | 2013 | kg | 5.6   |      |
| Guatemala     | ButterGhee           | 2013 | kg | 0.22  |      |
| Guatemala     | Cephalopods          | 2013 | kg | 0.03  |      |
| Guatemala     | Cheese               | 2013 | kg | 1.52  |      |
| Guatemala     | Cream                | 2013 | kg | 0.4   |      |
| Guatemala     | DemersalFish         | 2013 | kg | 0.02  |      |
| Guatemala     | Eggs                 | 2013 | kg | 14.61 |      |
| Guatemala     | FreshwaterFish       | 2013 | kg | 0.53  |      |
| Guatemala     | Honey                | 2013 | kg | 0.04  |      |
| Guatemala     | MarineFishOther      | 2013 | kg | 0.08  |      |
| Guatemala     | Milkwhole            | 2013 | kg | 26.02 |      |
| Guatemala     | Pigmeat              | 2013 | kg | 4.85  |      |
| Guatemala     | PoultryMeat          | 2013 | kg | 16.45 |      |
| Guinea        | AquaticPlants        | 2013 | kg | 0     |      |
| Guinea        | BovineMeat           | 2013 | kg | 6.26  |      |
| Guinea        | ButterGhee           | 2013 | kg | 0.05  |      |
| Guinea        | Cephalopods          | 2013 | kg | 0     |      |
| Guinea        | Cheese               | 2013 | kg | 0.01  |      |
| Guinea        | Cream                | 2013 | kg | 0     |      |
| Guinea        | DemersalFish         | 2013 | kg | 2.41  |      |
| Guinea        | Eggs                 | 2013 | kg | 1.95  |      |
| Guinea        | FreshwaterFish       | 2013 | kg | 1.51  |      |
| Guinea        | Honey                | 2013 | kg | 0.08  |      |
| Guinea        | MarineFishOther      | 2013 | kg | 1.27  |      |
| Guinea        | Milkwhole            | 2013 | kg | 19.58 |      |
| Guinea        | Pigmeat              | 2013 | kg | 0.16  |      |
| Guinea        | PoultryMeat          | 2013 | kg | 1.83  |      |
| Guinea        | whey                 | 2013 | kg | 0.09  |      |
| Guinea-Bissau | BovineMeat           | 2013 | kg | 3.94  |      |
| Guinea-Bissau | ButterGhee           | 2013 | kg | 0     |      |
| Guinea-Bissau | Cephalopods          | 2013 | kg | 0.08  |      |
| Guinea-Bissau | Cheese               | 2013 | kg | 0.01  |      |
| Guinea-Bissau | DemersalFish         | 2013 | kg | 0.32  |      |
| Guinea-Bissau | Eggs                 | 2013 | kg | 0.69  |      |

CoronaAnimalProd\_FoodSupply\_10Sept\_2020.sas

|               |                      |      |    |       |  |
|---------------|----------------------|------|----|-------|--|
| Guinea-Bissau | FreshwaterFish       | 2013 | kg | 0.09  |  |
| Guinea-Bissau | Honey                | 2013 | kg | 0.08  |  |
| Guinea-Bissau | MarineFishOther      | 2013 | kg | 0.41  |  |
| Guinea-Bissau | Milkwhole            | 2013 | kg | 19.63 |  |
| Guinea-Bissau | Pigmeat              | 2013 | kg | 9.08  |  |
| Guinea-Bissau | PoultryMeat          | 2013 | kg | 1.88  |  |
| Guyana        | BovineMeat           | 2013 | kg | 3.22  |  |
| Guyana        | ButterGhee           | 2013 | kg | 0.11  |  |
| Guyana        | Cheese               | 2013 | kg | 1.81  |  |
| Guyana        | Cream                | 2013 | kg | 0.05  |  |
| Guyana        | DemersalFish         | 2013 | kg | 1.69  |  |
| Guyana        | Eggs                 | 2013 | kg | 0.79  |  |
| Guyana        | FreshwaterFish       | 2013 | kg | 0.87  |  |
| Guyana        | Honey                | 2013 | kg | 0.13  |  |
| Guyana        | MarineFishOther      | 2013 | kg | 10.79 |  |
| Guyana        | Milkwhole            | 2013 | kg | 79.41 |  |
| Guyana        | Pigmeat              | 2013 | kg | 3.38  |  |
| Guyana        | PoultryMeat          | 2013 | kg | 35.99 |  |
| Guyana        | whey                 | 2013 | kg | 0     |  |
| Haiti         | AquaticAnimalsOthers | 2013 | kg | 0     |  |
| Haiti         | AquaticPlants        | 2013 | kg | 0     |  |
| Haiti         | BovineMeat           | 2013 | kg | 4.6   |  |
| Haiti         | ButterGhee           | 2013 | kg | 0.01  |  |
| Haiti         | Cephalopods          | 2013 | kg | 0     |  |
| Haiti         | Cheese               | 2013 | kg | 0.28  |  |
| Haiti         | Cream                | 2013 | kg | 0.01  |  |
| Haiti         | DemersalFish         | 2013 | kg | 0.29  |  |
| Haiti         | Eggs                 | 2013 | kg | 0.51  |  |
| Haiti         | FreshwaterFish       | 2013 | kg | 0.48  |  |
| Haiti         | Honey                | 2013 | kg | 0.04  |  |
| Haiti         | MarineFishOther      | 2013 | kg | 1.55  |  |
| Haiti         | Milkwhole            | 2013 | kg | 16.42 |  |
| Haiti         | Pigmeat              | 2013 | kg | 4.28  |  |
| Haiti         | PoultryMeat          | 2013 | kg | 7.58  |  |
| Honduras      | AquaticAnimalsOthers | 2013 | kg | 0     |  |
| Honduras      | AquaticPlants        | 2013 | kg | 0     |  |
| Honduras      | BovineMeat           | 2013 | kg | 7.19  |  |
| Honduras      | ButterGhee           | 2013 | kg | 0.82  |  |
| Honduras      | Cephalopods          | 2013 | kg | 0.01  |  |
| Honduras      | Cheese               | 2013 | kg | 1.84  |  |
| Honduras      | Cream                | 2013 | kg | 0.01  |  |
| Honduras      | DemersalFish         | 2013 | kg | 0.01  |  |
| Honduras      | Eggs                 | 2013 | kg | 5.19  |  |
| Honduras      | FreshwaterFish       | 2013 | kg | 1.25  |  |
| Honduras      | Honey                | 2013 | kg | 0.03  |  |
| Honduras      | MarineFishOther      | 2013 | kg | 0.48  |  |
| Honduras      | Milkwhole            | 2013 | kg | 68.99 |  |
| Honduras      | Pigmeat              | 2013 | kg | 6.48  |  |
| Honduras      | PoultryMeat          | 2013 | kg | 20.29 |  |
| Honduras      | whey                 | 2013 | kg | 0.01  |  |
| Hungary       | AquaticAnimalsOthers | 2013 | kg | 0.02  |  |
| Hungary       | AquaticPlants        | 2013 | kg | 0     |  |
| Hungary       | BovineMeat           | 2013 | kg | 4.96  |  |
| Hungary       | ButterGhee           | 2013 | kg | 0.81  |  |
| Hungary       | Cephalopods          | 2013 | kg | 0.02  |  |
| Hungary       | Cheese               | 2013 | kg | 10.78 |  |
| Hungary       | Cream                | 2013 | kg | 6.57  |  |
| Hungary       | DemersalFish         | 2013 | kg | 0.99  |  |
| Hungary       | Eggs                 | 2013 | kg | 12.45 |  |
| Hungary       | FreshwaterFish       | 2013 | kg | 2.69  |  |
| Hungary       | Honey                | 2013 | kg | 0.02  |  |
| Hungary       | MarineFishOther      | 2013 | kg | 0.21  |  |
| Hungary       | Milkwhole            | 2013 | kg | 63.79 |  |
| Hungary       | Pigmeat              | 2013 | kg | 34.93 |  |
| Hungary       | PoultryMeat          | 2013 | kg | 23.78 |  |
| Iceland       | AquaticAnimalsOthers | 2013 | kg | 0.05  |  |
| Iceland       | AquaticPlants        | 2013 | kg | 0     |  |
| Iceland       | BovineMeat           | 2013 | kg | 13.36 |  |
| Iceland       | ButterGhee           | 2013 | kg | 6.14  |  |
| Iceland       | Cephalopods          | 2013 | kg | 0     |  |
| Iceland       | Cheese               | 2013 | kg | 30.82 |  |
| Iceland       | Cream                | 2013 | kg | 7.75  |  |
| Iceland       | DemersalFish         | 2013 | kg | 25.81 |  |
| Iceland       | Eggs                 | 2013 | kg | 8.24  |  |
| Iceland       | FreshwaterFish       | 2013 | kg | 4.91  |  |
| Iceland       | Honey                | 2013 | kg | 0.34  |  |
| Iceland       | MarineFishOther      | 2013 | kg | 0     |  |
| Iceland       | Milkwhole            | 2013 | kg | 54    |  |
| Iceland       | Pigmeat              | 2013 | kg | 21.69 |  |
| Iceland       | PoultryMeat          | 2013 | kg | 26.87 |  |
| India         | AquaticAnimalsOthers | 2013 | kg | 0     |  |
| India         | AquaticPlants        | 2013 | kg | 0     |  |
| India         | BovineMeat           | 2013 | kg | 0.81  |  |
| India         | ButterGhee           | 2013 | kg | 3.03  |  |
| India         | Cephalopods          | 2013 | kg | 0     |  |
| India         | Cheese               | 2013 | kg | 0     |  |

|           |                      |      |    |       |  |  |
|-----------|----------------------|------|----|-------|--|--|
| India     | Cream                | 2013 | kg | 0     |  |  |
| India     | DemersalFish         | 2013 | kg | 0.3   |  |  |
| India     | Eggs                 | 2013 | kg | 2.58  |  |  |
| India     | FreshwaterFish       | 2013 | kg | 3.48  |  |  |
| India     | Honey                | 2013 | kg | 0.02  |  |  |
| India     | MarineFishOther      | 2013 | kg | 0.39  |  |  |
| India     | Milkwhole            | 2013 | kg | 52.81 |  |  |
| India     | Pigmeat              | 2013 | kg | 0.28  |  |  |
| India     | PoultryMeat          | 2013 | kg | 1.88  |  |  |
| India     | whey                 | 2013 | kg | 0     |  |  |
| Indonesia | AquaticAnimalsOthers | 2013 | kg | 0     |  |  |
| Indonesia | AquaticPlants        | 2013 | kg | 0     |  |  |
| Indonesia | BovineMeat           | 2013 | kg | 2.59  |  |  |
| Indonesia | ButterGhee           | 2013 | kg | 0.09  |  |  |
| Indonesia | Cephalopods          | 2013 | kg | 0.47  |  |  |
| Indonesia | Cheese               | 2013 | kg | 0.08  |  |  |
| Indonesia | Cream                | 2013 | kg | 0.06  |  |  |
| Indonesia | DemersalFish         | 2013 | kg | 4.51  |  |  |
| Indonesia | Eggs                 | 2013 | kg | 4.88  |  |  |
| Indonesia | FreshwaterFish       | 2013 | kg | 9.01  |  |  |
| Indonesia | Honey                | 2013 | kg | 0.01  |  |  |
| Indonesia | MarineFishOther      | 2013 | kg | 0.54  |  |  |
| Indonesia | Milkwhole            | 2013 | kg | 6     |  |  |
| Indonesia | Pigmeat              | 2013 | kg | 2.98  |  |  |
| Indonesia | PoultryMeat          | 2013 | kg | 7.5   |  |  |
| Iran      | AquaticAnimalsOthers | 2013 | kg | 0     |  |  |
| Iran      | AquaticPlants        | 2013 | kg | 0     |  |  |
| Iran      | BovineMeat           | 2013 | kg | 3.58  |  |  |
| Iran      | ButterGhee           | 2013 | kg | 2.66  |  |  |
| Iran      | Cephalopods          | 2013 | kg | 0.03  |  |  |
| Iran      | Cheese               | 2013 | kg | 2.76  |  |  |
| Iran      | Cream                | 2013 | kg | 0.01  |  |  |
| Iran      | DemersalFish         | 2013 | kg | 0.96  |  |  |
| Iran      | Eggs                 | 2013 | kg | 7.7   |  |  |
| Iran      | FreshwaterFish       | 2013 | kg | 5.03  |  |  |
| Iran      | Honey                | 2013 | kg | 0.96  |  |  |
| Iran      | MarineFishOther      | 2013 | kg | 0.33  |  |  |
| Iran      | Milkwhole            | 2013 | kg | 17.69 |  |  |
| Iran      | Pigmeat              | 2013 | kg | 0     |  |  |
| Iran      | PoultryMeat          | 2013 | kg | 25.38 |  |  |
| Iraq      | AquaticAnimalsOthers | 2013 | kg | 0     |  |  |
| Iraq      | AquaticPlants        | 2013 | kg | 0     |  |  |
| Iraq      | BovineMeat           | 2013 | kg | 2.96  |  |  |
| Iraq      | ButterGhee           | 2013 | kg | 0.18  |  |  |
| Iraq      | Cephalopods          | 2013 | kg | 0     |  |  |
| Iraq      | Cheese               | 2013 | kg | 1.06  |  |  |
| Iraq      | DemersalFish         | 2013 | kg | 0.83  |  |  |
| Iraq      | Eggs                 | 2013 | kg | 9.83  |  |  |
| Iraq      | FreshwaterFish       | 2013 | kg | 2.23  |  |  |
| Iraq      | Honey                | 2013 | kg | 0.02  |  |  |
| Iraq      | MarineFishOther      | 2013 | kg | 0.06  |  |  |
| Iraq      | Milkwhole            | 2013 | kg | 10.59 |  |  |
| Iraq      | Pigmeat              | 2013 | kg | 0     |  |  |
| Iraq      | PoultryMeat          | 2013 | kg | 14.83 |  |  |
| Ireland   | AquaticAnimalsOthers | 2013 | kg | 0.02  |  |  |
| Ireland   | AquaticPlants        | 2013 | kg | 0     |  |  |
| Ireland   | BovineMeat           | 2013 | kg | 22.35 |  |  |
| Ireland   | ButterGhee           | 2013 | kg | 3.03  |  |  |
| Ireland   | Cephalopods          | 2013 | kg | 0.05  |  |  |
| Ireland   | Cheese               | 2013 | kg | 13.17 |  |  |
| Ireland   | Cream                | 2013 | kg | 5.3   |  |  |
| Ireland   | DemersalFish         | 2013 | kg | 10.35 |  |  |
| Ireland   | Eggs                 | 2013 | kg | 8.96  |  |  |
| Ireland   | FreshwaterFish       | 2013 | kg | 1.15  |  |  |
| Ireland   | Honey                | 2013 | kg | 0.73  |  |  |
| Ireland   | MarineFishOther      | 2013 | kg | 0.04  |  |  |
| Ireland   | Milkwhole            | 2013 | kg | 91.94 |  |  |
| Ireland   | Pigmeat              | 2013 | kg | 32.4  |  |  |
| Ireland   | PoultryMeat          | 2013 | kg | 26.26 |  |  |
| Israel    | AquaticAnimalsOthers | 2013 | kg | 0.02  |  |  |
| Israel    | AquaticPlants        | 2013 | kg | 0     |  |  |
| Israel    | BovineMeat           | 2013 | kg | 28.78 |  |  |
| Israel    | ButterGhee           | 2013 | kg | 0.84  |  |  |
| Israel    | Cephalopods          | 2013 | kg | 0.18  |  |  |
| Israel    | Cheese               | 2013 | kg | 17.33 |  |  |
| Israel    | Cream                | 2013 | kg | 0     |  |  |
| Israel    | DemersalFish         | 2013 | kg | 5.45  |  |  |
| Israel    | Eggs                 | 2013 | kg | 11.35 |  |  |
| Israel    | FreshwaterFish       | 2013 | kg | 8.72  |  |  |
| Israel    | Honey                | 2013 | kg | 0.52  |  |  |
| Israel    | MarineFishOther      | 2013 | kg | 0.29  |  |  |
| Israel    | Milkwhole            | 2013 | kg | 89.5  |  |  |
| Israel    | Pigmeat              | 2013 | kg | 1.99  |  |  |
| Israel    | PoultryMeat          | 2013 | kg | 62.5  |  |  |
| Italy     | AquaticAnimalsOthers | 2013 | kg | 0.44  |  |  |
| Italy     | AquaticPlants        | 2013 | kg | 0     |  |  |

CoronaAnimalProd\_FoodSupply\_10Sept\_2020.sas

|            |                      |      |    |        |  |   |
|------------|----------------------|------|----|--------|--|---|
| Italy      | BovineMeat           | 2013 | kg | 18.6   |  |   |
| Italy      | ButterGhee           | 2013 | kg | 2.84   |  |   |
| Italy      | Cephalopods          | 2013 | kg | 3.01   |  |   |
| Italy      | Cheese               | 2013 | kg | 23.11  |  |   |
| Italy      | Cream                | 2013 | kg | 2.95   |  |   |
| Italy      | DemersalFish         | 2013 | kg | 7.03   |  |   |
| Italy      | Eggs                 | 2013 | kg | 13.34  |  |   |
| Italy      | FreshwaterFish       | 2013 | kg | 3.06   |  |   |
| Italy      | Honey                | 2013 | kg | 0.27   |  |   |
| Italy      | MarineFishOther      | 2013 | kg | 1.07   |  |   |
| Italy      | Milkwhole            | 2013 | kg | 29.78  |  |   |
| Italy      | Pigmeat              | 2013 | kg | 40.28  |  |   |
| Italy      | PoultryMeat          | 2013 | kg | 18.61  |  |   |
| Jamaica    | AquaticAnimalsOthers | 2013 | kg | 0      |  | 0 |
| Jamaica    | AquaticPlants        | 2013 | kg | 0      |  |   |
| Jamaica    | BovineMeat           | 2013 | kg | 3.97   |  |   |
| Jamaica    | ButterGhee           | 2013 | kg | 0.31   |  |   |
| Jamaica    | Cephalopods          | 2013 | kg | 0.01   |  |   |
| Jamaica    | Cheese               | 2013 | kg | 1.23   |  |   |
| Jamaica    | Cream                | 2013 | kg | 0.07   |  |   |
| Jamaica    | DemersalFish         | 2013 | kg | 0.05   |  |   |
| Jamaica    | Eggs                 | 2013 | kg | 2.27   |  |   |
| Jamaica    | FreshwaterFish       | 2013 | kg | 0.69   |  |   |
| Jamaica    | Honey                | 2013 | kg | 0.28   |  |   |
| Jamaica    | MarineFishOther      | 2013 | kg | 12.61  |  |   |
| Jamaica    | Milkwhole            | 2013 | kg | 72.18  |  |   |
| Jamaica    | Pigmeat              | 2013 | kg | 3.99   |  |   |
| Jamaica    | PoultryMeat          | 2013 | kg | 52.51  |  |   |
| Japan      | AquaticAnimalsOthers | 2013 | kg | 0.26   |  |   |
| Japan      | AquaticPlants        | 2013 | kg | 0.92   |  |   |
| Japan      | BovineMeat           | 2013 | kg | 9.15   |  |   |
| Japan      | ButterGhee           | 2013 | kg | 0.57   |  |   |
| Japan      | Cephalopods          | 2013 | kg | 3.93   |  |   |
| Japan      | Cheese               | 2013 | kg | 2.89   |  |   |
| Japan      | Cream                | 2013 | kg | 0      |  |   |
| Japan      | DemersalFish         | 2013 | kg | 7.3    |  |   |
| Japan      | Eggs                 | 2013 | kg | 19.15  |  |   |
| Japan      | FreshwaterFish       | 2013 | kg | 5      |  |   |
| Japan      | Honey                | 2013 | kg | 0.33   |  |   |
| Japan      | MarineFishOther      | 2013 | kg | 5.75   |  |   |
| Japan      | Milkwhole            | 2013 | kg | 46.08  |  |   |
| Japan      | Pigmeat              | 2013 | kg | 20.62  |  |   |
| Japan      | PoultryMeat          | 2013 | kg | 19.42  |  |   |
| Jordan     | AquaticPlants        | 2013 | kg | 0      |  |   |
| Jordan     | BovineMeat           | 2013 | kg | 5.61   |  |   |
| Jordan     | ButterGhee           | 2013 | kg | 0.22   |  |   |
| Jordan     | Cephalopods          | 2013 | kg | 0.01   |  |   |
| Jordan     | Cheese               | 2013 | kg | 2.69   |  |   |
| Jordan     | Cream                | 2013 | kg | 0.46   |  |   |
| Jordan     | DemersalFish         | 2013 | kg | 0.29   |  |   |
| Jordan     | Eggs                 | 2013 | kg | 3.92   |  |   |
| Jordan     | FreshwaterFish       | 2013 | kg | 0.16   |  |   |
| Jordan     | Honey                | 2013 | kg | 0.13   |  |   |
| Jordan     | MarineFishOther      | 2013 | kg | 2.7    |  |   |
| Jordan     | Milkwhole            | 2013 | kg | 38.55  |  |   |
| Jordan     | Pigmeat              | 2013 | kg | 0.02   |  |   |
| Jordan     | PoultryMeat          | 2013 | kg | 33.39  |  |   |
| Kazakhstan | AquaticAnimalsOthers | 2013 | kg | 0.01   |  |   |
| Kazakhstan | AquaticPlants        | 2013 | kg | 0      |  |   |
| Kazakhstan | BovineMeat           | 2013 | kg | 23.38  |  |   |
| Kazakhstan | ButterGhee           | 2013 | kg | 1.37   |  |   |
| Kazakhstan | Cephalopods          | 2013 | kg | 0.02   |  |   |
| Kazakhstan | Cheese               | 2013 | kg | 2.63   |  |   |
| Kazakhstan | Cream                | 2013 | kg | 0.95   |  |   |
| Kazakhstan | DemersalFish         | 2013 | kg | 0.52   |  |   |
| Kazakhstan | Eggs                 | 2013 | kg | 8.29   |  |   |
| Kazakhstan | FreshwaterFish       | 2013 | kg | 1.74   |  |   |
| Kazakhstan | Honey                | 2013 | kg | 0.12   |  |   |
| Kazakhstan | MarineFishOther      | 2013 | kg | 0.5    |  |   |
| Kazakhstan | Milkwhole            | 2013 | kg | 258.44 |  |   |
| Kazakhstan | Pigmeat              | 2013 | kg | 10.36  |  |   |
| Kazakhstan | PoultryMeat          | 2013 | kg | 18.38  |  |   |
| Kenya      | AquaticAnimalsOthers | 2013 | kg | 0      |  |   |
| Kenya      | AquaticPlants        | 2013 | kg | 0      |  |   |
| Kenya      | BovineMeat           | 2013 | kg | 9.54   |  |   |
| Kenya      | ButterGhee           | 2013 | kg | 0.35   |  |   |
| Kenya      | Cephalopods          | 2013 | kg | 0      |  |   |
| Kenya      | Cheese               | 2013 | kg | 0.01   |  |   |
| Kenya      | Cream                | 2013 | kg | 0.34   |  |   |
| Kenya      | DemersalFish         | 2013 | kg | 0.08   |  |   |
| Kenya      | Eggs                 | 2013 | kg | 1.84   |  |   |
| Kenya      | FreshwaterFish       | 2013 | kg | 4.12   |  |   |
| Kenya      | Honey                | 2013 | kg | 0.27   |  |   |
| Kenya      | MarineFishOther      | 2013 | kg | 0.04   |  |   |
| Kenya      | Milkwhole            | 2013 | kg | 89.66  |  |   |
| Kenya      | Pigmeat              | 2013 | kg | 0.29   |  |   |

|            |                      |      |    |        |  |      |
|------------|----------------------|------|----|--------|--|------|
| Kenya      | PoultryMeat          | 2013 | kg | 0.47   |  |      |
| Kenya      | whey                 | 2013 | kg | 0      |  |      |
| Kiribati   | AquaticAnimalsOthers | 2013 | kg | 0      |  | 0.47 |
| Kiribati   | AquaticPlants        | 2013 | kg | 0      |  |      |
| Kiribati   | BovineMeat           | 2013 | kg | 3.92   |  |      |
| Kiribati   | ButterGhee           | 2013 | kg | 0.28   |  |      |
| Kiribati   | Cephalopods          | 2013 | kg | 0      |  |      |
| Kiribati   | Cheese               | 2013 | kg | 0.02   |  |      |
| Kiribati   | Cream                | 2013 | kg | 0      |  |      |
| Kiribati   | DemersalFish         | 2013 | kg | 17.69  |  |      |
| Kiribati   | Eggs                 | 2013 | kg | 2.78   |  |      |
| Kiribati   | FreshwaterFish       | 2013 | kg | 0      |  | 0.03 |
| Kiribati   | Honey                | 2013 | kg | 0.01   |  |      |
| Kiribati   | MarineFishOther      | 2013 | kg | 0.74   |  |      |
| Kiribati   | Milkwhole            | 2013 | kg | 1.06   |  |      |
| Kiribati   | Pigmeat              | 2013 | kg | 11.89  |  |      |
| Kiribati   | PoultryMeat          | 2013 | kg | 15.89  |  |      |
| Kiribati   | whey                 | 2013 | kg | 1.19   |  |      |
| Kuwait     | AquaticAnimalsOthers | 2013 | kg | 0      |  | 0.03 |
| Kuwait     | AquaticPlants        | 2013 | kg | 0      |  |      |
| Kuwait     | BovineMeat           | 2013 | kg | 13.03  |  |      |
| Kuwait     | ButterGhee           | 2013 | kg | 2.63   |  |      |
| Kuwait     | Cephalopods          | 2013 | kg | 0.03   |  |      |
| Kuwait     | Cheese               | 2013 | kg | 8.69   |  |      |
| Kuwait     | Cream                | 2013 | kg | 0.3    |  |      |
| Kuwait     | DemersalFish         | 2013 | kg | 2.99   |  |      |
| Kuwait     | Eggs                 | 2013 | kg | 12.6   |  |      |
| Kuwait     | FreshwaterFish       | 2013 | kg | 2.64   |  |      |
| Kuwait     | Honey                | 2013 | kg | 0.37   |  |      |
| Kuwait     | MarineFishOther      | 2013 | kg | 1.76   |  |      |
| Kuwait     | Milkwhole            | 2013 | kg | 43.16  |  |      |
| Kuwait     | PoultryMeat          | 2013 | kg | 53.61  |  |      |
| Kyrgyzstan | AquaticPlants        | 2013 | kg | 0      |  |      |
| Kyrgyzstan | BovineMeat           | 2013 | kg | 14.9   |  |      |
| Kyrgyzstan | ButterGhee           | 2013 | kg | 0.27   |  |      |
| Kyrgyzstan | Cephalopods          | 2013 | kg | 0      |  |      |
| Kyrgyzstan | Cheese               | 2013 | kg | 0.74   |  |      |
| Kyrgyzstan | Cream                | 2013 | kg | 0.13   |  |      |
| Kyrgyzstan | DemersalFish         | 2013 | kg | 0.06   |  |      |
| Kyrgyzstan | Eggs                 | 2013 | kg | 4.64   |  |      |
| Kyrgyzstan | FreshwaterFish       | 2013 | kg | 0.13   |  |      |
| Kyrgyzstan | Honey                | 2013 | kg | 0.26   |  |      |
| Kyrgyzstan | MarineFishOther      | 2013 | kg | 0.51   |  |      |
| Kyrgyzstan | Milkwhole            | 2013 | kg | 202.86 |  |      |
| Kyrgyzstan | Pigmeat              | 2013 | kg | 4.52   |  |      |
| Kyrgyzstan | PoultryMeat          | 2013 | kg | 2.31   |  |      |
| Lao        | AquaticAnimalsOthers | 2013 | kg | 0      |  |      |
| Lao        | AquaticPlants        | 2013 | kg | 0      |  |      |
| Lao        | BovineMeat           | 2013 | kg | 7.29   |  |      |
| Lao        | ButterGhee           | 2013 | kg | 0.04   |  |      |
| Lao        | Cephalopods          | 2013 | kg | 0      |  |      |
| Lao        | Cheese               | 2013 | kg | 0.01   |  |      |
| Lao        | DemersalFish         | 2013 | kg | 0      |  |      |
| Lao        | Eggs                 | 2013 | kg | 2.04   |  |      |
| Lao        | FreshwaterFish       | 2013 | kg | 19.19  |  |      |
| Lao        | MarineFishOther      | 2013 | kg | 0.24   |  |      |
| Lao        | Milkwhole            | 2013 | kg | 2.53   |  |      |
| Lao        | Pigmeat              | 2013 | kg | 9.31   |  |      |
| Lao        | PoultryMeat          | 2013 | kg | 4.21   |  |      |
| Latvia     | AquaticAnimalsOthers | 2013 | kg | 0      |  | 0.01 |
| Latvia     | AquaticPlants        | 2013 | kg | 0      |  |      |
| Latvia     | BovineMeat           | 2013 | kg | 5.11   |  |      |
| Latvia     | ButterGhee           | 2013 | kg | 1.68   |  |      |
| Latvia     | Cephalopods          | 2013 | kg | 0.16   |  |      |
| Latvia     | Cheese               | 2013 | kg | 16.32  |  |      |
| Latvia     | Cream                | 2013 | kg | 18.45  |  |      |
| Latvia     | DemersalFish         | 2013 | kg | 2.59   |  |      |
| Latvia     | Eggs                 | 2013 | kg | 14.03  |  |      |
| Latvia     | FreshwaterFish       | 2013 | kg | 3.12   |  |      |
| Latvia     | Honey                | 2013 | kg | 0.87   |  |      |
| Latvia     | MarineFishOther      | 2013 | kg | 5.57   |  |      |
| Latvia     | Milkwhole            | 2013 | kg | 32.22  |  |      |
| Latvia     | Pigmeat              | 2013 | kg | 34.96  |  |      |
| Latvia     | PoultryMeat          | 2013 | kg | 20.53  |  |      |
| Latvia     | whey                 | 2013 | kg | 0.46   |  |      |
| Lebanon    | AquaticPlants        | 2013 | kg | 0      |  |      |
| Lebanon    | BovineMeat           | 2013 | kg | 15.22  |  |      |
| Lebanon    | ButterGhee           | 2013 | kg | 1.24   |  |      |
| Lebanon    | Cephalopods          | 2013 | kg | 0.1    |  |      |
| Lebanon    | Cheese               | 2013 | kg | 9.28   |  |      |
| Lebanon    | Cream                | 2013 | kg | 0.65   |  |      |
| Lebanon    | DemersalFish         | 2013 | kg | 0.48   |  |      |
| Lebanon    | Eggs                 | 2013 | kg | 3.7    |  |      |
| Lebanon    | FreshwaterFish       | 2013 | kg | 0.66   |  |      |
| Lebanon    | Honey                | 2013 | kg | 0.37   |  |      |
| Lebanon    | MarineFishOther      | 2013 | kg | 4.87   |  |      |



CoronaAnimalProd\_FoodSupply\_10Sept\_2020.sas

|            |                      |      |    |       |  |
|------------|----------------------|------|----|-------|--|
| Lebanon    | Milkwhole            | 2013 | kg | 51.07 |  |
| Lebanon    | Pigmeat              | 2013 | kg | 1.7   |  |
| Lebanon    | PoultryMeat          | 2013 | kg | 20.37 |  |
| Lebanon    | Whey                 | 2013 | kg | 1.5   |  |
| Lesotho    | AquaticPlants        | 2013 | kg | 0     |  |
| Lesotho    | BovineMeat           | 2013 | kg | 6.02  |  |
| Lesotho    | ButterGhee           | 2013 | kg | 0.06  |  |
| Lesotho    | Cephalopods          | 2013 | kg | 0     |  |
| Lesotho    | Cheese               | 2013 | kg | 0.11  |  |
| Lesotho    | DemersalFish         | 2013 | kg | 0     |  |
| Lesotho    | Eggs                 | 2013 | kg | 1.06  |  |
| Lesotho    | FreshwaterFish       | 2013 | kg | 0.19  |  |
| Lesotho    | Honey                | 2013 | kg | 0.01  |  |
| Lesotho    | MarineFishOther      | 2013 | kg | 0.18  |  |
| Lesotho    | Milkwhole            | 2013 | kg | 19.86 |  |
| Lesotho    | Pigmeat              | 2013 | kg | 2.14  |  |
| Lesotho    | PoultryMeat          | 2013 | kg | 10.24 |  |
| Liberia    | AquaticAnimalsothers | 2013 | kg | 0     |  |
| Liberia    | BovineMeat           | 2013 | kg | 0.78  |  |
| Liberia    | ButterGhee           | 2013 | kg | 0.01  |  |
| Liberia    | Cephalopods          | 2013 | kg | 0.01  |  |
| Liberia    | Cheese               | 2013 | kg | 0.02  |  |
| Liberia    | DemersalFish         | 2013 | kg | 0.85  |  |
| Liberia    | Eggs                 | 2013 | kg | 2.05  |  |
| Liberia    | FreshwaterFish       | 2013 | kg | 0.54  |  |
| Liberia    | Honey                | 2013 | kg | 0     |  |
| Liberia    | MarineFishOther      | 2013 | kg | 1.09  |  |
| Liberia    | Milkwhole            | 2013 | kg | 2.42  |  |
| Liberia    | Pigmeat              | 2013 | kg | 4.01  |  |
| Liberia    | PoultryMeat          | 2013 | kg | 8.91  |  |
| Liberia    | Whey                 | 2013 | kg | 0     |  |
| Lithuania  | AquaticAnimalsothers | 2013 | kg | 0.24  |  |
| Lithuania  | AquaticPlants        | 2013 | kg | 0     |  |
| Lithuania  | BovineMeat           | 2013 | kg | 4.49  |  |
| Lithuania  | ButterGhee           | 2013 | kg | 2.51  |  |
| Lithuania  | Cephalopods          | 2013 | kg | 0.09  |  |
| Lithuania  | Cheese               | 2013 | kg | 15.1  |  |
| Lithuania  | Cream                | 2013 | kg | 5.15  |  |
| Lithuania  | DemersalFish         | 2013 | kg | 6.33  |  |
| Lithuania  | Eggs                 | 2013 | kg | 13.11 |  |
| Lithuania  | FreshwaterFish       | 2013 | kg | 4.36  |  |
| Lithuania  | Honey                | 2013 | kg | 0.68  |  |
| Lithuania  | MarineFishOther      | 2013 | kg | 0.01  |  |
| Lithuania  | Milkwhole            | 2013 | kg | 81.06 |  |
| Lithuania  | Pigmeat              | 2013 | kg | 45.67 |  |
| Lithuania  | PoultryMeat          | 2013 | kg | 26.84 |  |
| Luxembourg | AquaticAnimalsothers | 2013 | kg | 0.14  |  |
| Luxembourg | AquaticPlants        | 2013 | kg | 0     |  |
| Luxembourg | BovineMeat           | 2013 | kg | 29.88 |  |
| Luxembourg | ButterGhee           | 2013 | kg | 2.01  |  |
| Luxembourg | Cephalopods          | 2013 | kg | 0.9   |  |
| Luxembourg | Cheese               | 2013 | kg | 14.86 |  |
| Luxembourg | Cream                | 2013 | kg | 2.93  |  |
| Luxembourg | DemersalFish         | 2013 | kg | 8.46  |  |
| Luxembourg | Eggs                 | 2013 | kg | 14.64 |  |
| Luxembourg | FreshwaterFish       | 2013 | kg | 7.43  |  |
| Luxembourg | Honey                | 2013 | kg | 0.48  |  |
| Luxembourg | MarineFishOther      | 2013 | kg | 2.52  |  |
| Luxembourg | Milkwhole            | 2013 | kg | 87.91 |  |
| Luxembourg | Pigmeat              | 2013 | kg | 43.58 |  |
| Luxembourg | PoultryMeat          | 2013 | kg | 21.37 |  |
| Madagascar | AquaticAnimalsothers | 2013 | kg | 0.04  |  |
| Madagascar | AquaticPlants        | 2013 | kg | 0     |  |
| Madagascar | BovineMeat           | 2013 | kg | 7.51  |  |
| Madagascar | ButterGhee           | 2013 | kg | 0.01  |  |
| Madagascar | Cephalopods          | 2013 | kg | 0.02  |  |
| Madagascar | Cheese               | 2013 | kg | 0.02  |  |
| Madagascar | Cream                | 2013 | kg | 0     |  |
| Madagascar | DemersalFish         | 2013 | kg | 0.24  |  |
| Madagascar | Eggs                 | 2013 | kg | 0.71  |  |
| Madagascar | FreshwaterFish       | 2013 | kg | 1.49  |  |
| Madagascar | Honey                | 2013 | kg | 0.19  |  |
| Madagascar | MarineFishOther      | 2013 | kg | 1.32  |  |
| Madagascar | Milkwhole            | 2013 | kg | 24.24 |  |
| Madagascar | Pigmeat              | 2013 | kg | 2.56  |  |
| Madagascar | PoultryMeat          | 2013 | kg | 3.14  |  |
| Madagascar | Whey                 | 2013 | kg | 0.18  |  |
| Malawi     | AquaticPlants        | 2013 | kg | 0     |  |
| Malawi     | BovineMeat           | 2013 | kg | 2.35  |  |
| Malawi     | ButterGhee           | 2013 | kg | 0.01  |  |
| Malawi     | Cephalopods          | 2013 | kg | 0     |  |
| Malawi     | Cheese               | 2013 | kg | 0.01  |  |
| Malawi     | Cream                | 2013 | kg | 0     |  |
| Malawi     | DemersalFish         | 2013 | kg | 0     |  |
| Malawi     | Eggs                 | 2013 | kg | 1.08  |  |
| Malawi     | FreshwaterFish       | 2013 | kg | 7.09  |  |

|            |                      |      |    |        |  |  |
|------------|----------------------|------|----|--------|--|--|
| Malawi     | Honey                | 2013 | kg | 0      |  |  |
| Malawi     | MarineFishOther      | 2013 | kg | 0.22   |  |  |
| Malawi     | Milkwhole            | 2013 | kg | 7.34   |  |  |
| Malawi     | Pigmeat              | 2013 | kg | 5.45   |  |  |
| Malawi     | PoultryMeat          | 2013 | kg | 1.38   |  |  |
| Malawi     | Whey                 | 2013 | kg | 0      |  |  |
| Malaysia   | AquaticAnimalsOthers | 2013 | kg | 0.27   |  |  |
| Malaysia   | AquaticPlants        | 2013 | kg | 0      |  |  |
| Malaysia   | BovineMeat           | 2013 | kg | 6.52   |  |  |
| Malaysia   | ButterGhee           | 2013 | kg | 0.32   |  |  |
| Malaysia   | Cephalopods          | 2013 | kg | 2.52   |  |  |
| Malaysia   | Cheese               | 2013 | kg | 0.46   |  |  |
| Malaysia   | Cream                | 2013 | kg | 0.02   |  |  |
| Malaysia   | DemersalFish         | 2013 | kg | 12.1   |  |  |
| Malaysia   | Eggs                 | 2013 | kg | 16.57  |  |  |
| Malaysia   | FreshwaterFish       | 2013 | kg | 7.34   |  |  |
| Malaysia   | Honey                | 2013 | kg | 0.04   |  |  |
| Malaysia   | MarineFishOther      | 2013 | kg | 10.93  |  |  |
| Malaysia   | Milkwhole            | 2013 | kg | 4.13   |  |  |
| Malaysia   | Pigmeat              | 2013 | kg | 7.76   |  |  |
| Malaysia   | PoultryMeat          | 2013 | kg | 41.01  |  |  |
| Malaysia   | Whey                 | 2013 | kg | 0      |  |  |
| Maldives   | AquaticAnimalsOthers | 2013 | kg | 0.1    |  |  |
| Maldives   | AquaticPlants        | 2013 | kg | 0      |  |  |
| Maldives   | BovineMeat           | 2013 | kg | 9.44   |  |  |
| Maldives   | ButterGhee           | 2013 | kg | 2.06   |  |  |
| Maldives   | Cephalopods          | 2013 | kg | 0.75   |  |  |
| Maldives   | Cheese               | 2013 | kg | 1.42   |  |  |
| Maldives   | Cream                | 2013 | kg | 0.23   |  |  |
| Maldives   | DemersalFish         | 2013 | kg | 0.3    |  |  |
| Maldives   | Eggs                 | 2013 | kg | 10.79  |  |  |
| Maldives   | FreshwaterFish       | 2013 | kg | 0.73   |  |  |
| Maldives   | Honey                | 2013 | kg | 0.34   |  |  |
| Maldives   | MarineFishOther      | 2013 | kg | 15.34  |  |  |
| Maldives   | Milkwhole            | 2013 | kg | 78.48  |  |  |
| Maldives   | Pigmeat              | 2013 | kg | 1.22   |  |  |
| Maldives   | PoultryMeat          | 2013 | kg | 18.47  |  |  |
| Maldives   | Whey                 | 2013 | kg | 0      |  |  |
| Mali       | AquaticPlants        | 2013 | kg | 0      |  |  |
| Mali       | BovineMeat           | 2013 | kg | 9.96   |  |  |
| Mali       | ButterGhee           | 2013 | kg | 0.01   |  |  |
| Mali       | Cephalopods          | 2013 | kg | 0      |  |  |
| Mali       | Cheese               | 2013 | kg | 0.02   |  |  |
| Mali       | Cream                | 2013 | kg | 0      |  |  |
| Mali       | DemersalFish         | 2013 | kg | 0.09   |  |  |
| Mali       | Eggs                 | 2013 | kg | 0.91   |  |  |
| Mali       | FreshwaterFish       | 2013 | kg | 6.14   |  |  |
| Mali       | Honey                | 2013 | kg | 0.01   |  |  |
| Mali       | MarineFishOther      | 2013 | kg | 1.2    |  |  |
| Mali       | Milkwhole            | 2013 | kg | 98.14  |  |  |
| Mali       | Pigmeat              | 2013 | kg | 0.17   |  |  |
| Mali       | PoultryMeat          | 2013 | kg | 3.07   |  |  |
| Malta      | AquaticAnimalsOthers | 2013 | kg | 0.03   |  |  |
| Malta      | AquaticPlants        | 2013 | kg | 0      |  |  |
| Malta      | BovineMeat           | 2013 | kg | 19.22  |  |  |
| Malta      | ButterGhee           | 2013 | kg | 1.01   |  |  |
| Malta      | Cephalopods          | 2013 | kg | 1.17   |  |  |
| Malta      | Cheese               | 2013 | kg | 13.97  |  |  |
| Malta      | Cream                | 2013 | kg | 0.26   |  |  |
| Malta      | DemersalFish         | 2013 | kg | 3.34   |  |  |
| Malta      | Eggs                 | 2013 | kg | 11.64  |  |  |
| Malta      | FreshwaterFish       | 2013 | kg | 3.14   |  |  |
| Malta      | Honey                | 2013 | kg | 0.24   |  |  |
| Malta      | MarineFishOther      | 2013 | kg | 2.56   |  |  |
| Malta      | Milkwhole            | 2013 | kg | 85.07  |  |  |
| Malta      | Pigmeat              | 2013 | kg | 34.24  |  |  |
| Malta      | PoultryMeat          | 2013 | kg | 26.4   |  |  |
| Mauritania | AquaticAnimalsOthers | 2013 | kg | 0      |  |  |
| Mauritania | BovineMeat           | 2013 | kg | 6.52   |  |  |
| Mauritania | ButterGhee           | 2013 | kg | 0.44   |  |  |
| Mauritania | Cephalopods          | 2013 | kg | 0.02   |  |  |
| Mauritania | Cheese               | 2013 | kg | 1.76   |  |  |
| Mauritania | Cream                | 2013 | kg | 0.16   |  |  |
| Mauritania | DemersalFish         | 2013 | kg | 0.58   |  |  |
| Mauritania | Eggs                 | 2013 | kg | 2.13   |  |  |
| Mauritania | FreshwaterFish       | 2013 | kg | 3.86   |  |  |
| Mauritania | Honey                | 2013 | kg | 0      |  |  |
| Mauritania | MarineFishOther      | 2013 | kg | 1.03   |  |  |
| Mauritania | Milkwhole            | 2013 | kg | 137.84 |  |  |
| Mauritania | Pigmeat              | 2013 | kg | 0.02   |  |  |
| Mauritania | PoultryMeat          | 2013 | kg | 5.6    |  |  |
| Mauritania | Whey                 | 2013 | kg | 0.03   |  |  |
| Mauritius  | AquaticAnimalsOthers | 2013 | kg | 0.11   |  |  |
| Mauritius  | AquaticPlants        | 2013 | kg | 0      |  |  |
| Mauritius  | BovineMeat           | 2013 | kg | 5.99   |  |  |
| Mauritius  | ButterGhee           | 2013 | kg | 0.91   |  |  |

CoronaAnimalProd\_FoodSupply\_10Sept\_2020.sas

|            |                      |      |    |        |      |  |
|------------|----------------------|------|----|--------|------|--|
| Mauritius  | Cephalopods          | 2013 |    | kg     | 1.32 |  |
| Mauritius  | Cheese               | 2013 | kg | 2.61   |      |  |
| Mauritius  | Cream                | 2013 | kg | 0.45   |      |  |
| Mauritius  | DemersalFish         | 2013 | kg | 3.73   |      |  |
| Mauritius  | Eggs                 | 2013 | kg | 6.32   |      |  |
| Mauritius  | FreshwaterFish       | 2013 | kg | 0.76   |      |  |
| Mauritius  | Honey                | 2013 | kg | 0.17   |      |  |
| Mauritius  | MarineFishOther      | 2013 | kg | 3.3    |      |  |
| Mauritius  | Milkwhole            | 2013 | kg | 38.44  |      |  |
| Mauritius  | Pigmeat              | 2013 | kg | 4.08   |      |  |
| Mauritius  | PoultryMeat          | 2013 | kg | 38.51  |      |  |
| Mexico     | AquaticAnimalsothers | 2013 | kg | 0.16   |      |  |
| Mexico     | AquaticPlants        | 2013 | kg | 0      |      |  |
| Mexico     | BovineMeat           | 2013 | kg | 15.33  |      |  |
| Mexico     | ButterGhee           | 2013 | kg | 0.46   |      |  |
| Mexico     | Cephalopods          | 2013 | kg | 0.32   |      |  |
| Mexico     | Cheese               | 2013 | kg | 2.13   |      |  |
| Mexico     | Cream                | 2013 | kg | 0.05   |      |  |
| Mexico     | DemersalFish         | 2013 | kg | 0.91   |      |  |
| Mexico     | Eggs                 | 2013 | kg | 18.34  |      |  |
| Mexico     | FreshwaterFish       | 2013 | kg | 1.23   |      |  |
| Mexico     | Honey                | 2013 | kg | 0.19   |      |  |
| Mexico     | MarineFishOther      | 2013 | kg | 1.77   |      |  |
| Mexico     | Milkwhole            | 2013 | kg | 74.68  |      |  |
| Mexico     | Pigmeat              | 2013 | kg | 15.23  |      |  |
| Mexico     | PoultryMeat          | 2013 | kg | 30.12  |      |  |
| Mongolia   | AquaticPlants        | 2013 | kg | 0      |      |  |
| Mongolia   | BovineMeat           | 2013 | kg | 19.95  |      |  |
| Mongolia   | ButterGhee           | 2013 | kg | 0.42   |      |  |
| Mongolia   | Cephalopods          | 2013 | kg | 0      |      |  |
| Mongolia   | Cheese               | 2013 | kg | 1.15   |      |  |
| Mongolia   | Cream                | 2013 | kg | 0      |      |  |
| Mongolia   | DemersalFish         | 2013 | kg | 0.07   |      |  |
| Mongolia   | Eggs                 | 2013 | kg | 2.23   |      |  |
| Mongolia   | FreshwaterFish       | 2013 | kg | 0      |      |  |
| Mongolia   | Honey                | 2013 | kg | 0.05   |      |  |
| Mongolia   | MarineFishOther      | 2013 | kg | 0.52   |      |  |
| Mongolia   | Milkwhole            | 2013 | kg | 125.66 |      |  |
| Mongolia   | Pigmeat              | 2013 | kg | 0.47   |      |  |
| Mongolia   | PoultryMeat          | 2013 | kg | 3.04   |      |  |
| Montenegro | AquaticAnimalsothers | 2013 | kg | 0.06   |      |  |
| Montenegro | BovineMeat           | 2013 | kg | 12.59  |      |  |
| Montenegro | ButterGhee           | 2013 | kg | 2.2    |      |  |
| Montenegro | Cephalopods          | 2013 | kg | 0.89   |      |  |
| Montenegro | Cheese               | 2013 | kg | 17.24  |      |  |
| Montenegro | Cream                | 2013 | kg | 0      |      |  |
| Montenegro | DemersalFish         | 2013 | kg | 2.57   |      |  |
| Montenegro | Eggs                 | 2013 | kg | 11.6   |      |  |
| Montenegro | FreshwaterFish       | 2013 | kg | 3.06   |      |  |
| Montenegro | Honey                | 2013 | kg | 1.1    |      |  |
| Montenegro | MarineFishOther      | 2013 | kg | 0.94   |      |  |
| Montenegro | Milkwhole            | 2013 | kg | 173.9  |      |  |
| Montenegro | Pigmeat              | 2013 | kg | 53.04  |      |  |
| Montenegro | PoultryMeat          | 2013 | kg | 15.92  |      |  |
| Morocco    | AquaticAnimalsothers | 2013 | kg | 0      |      |  |
| Morocco    | AquaticPlants        | 2013 | kg | 0      |      |  |
| Morocco    | BovineMeat           | 2013 | kg | 8.04   |      |  |
| Morocco    | ButterGhee           | 2013 | kg | 2.04   |      |  |
| Morocco    | Cephalopods          | 2013 | kg | 0.08   |      |  |
| Morocco    | Cheese               | 2013 | kg | 0.97   |      |  |
| Morocco    | Cream                | 2013 | kg | 0.02   |      |  |
| Morocco    | DemersalFish         | 2013 | kg | 1.82   |      |  |
| Morocco    | Eggs                 | 2013 | kg | 6.68   |      |  |
| Morocco    | FreshwaterFish       | 2013 | kg | 0.6    |      |  |
| Morocco    | Honey                | 2013 | kg | 0.21   |      |  |
| Morocco    | MarineFishOther      | 2013 | kg | 1.42   |      |  |
| Morocco    | Milkwhole            | 2013 | kg | 19.02  |      |  |
| Morocco    | Pigmeat              | 2013 | kg | 0.01   |      |  |
| Morocco    | PoultryMeat          | 2013 | kg | 20.77  |      |  |
| Mozambique | AquaticAnimalsothers | 2013 | kg | 0      |      |  |
| Mozambique | AquaticPlants        | 2013 | kg | 0      |      |  |
| Mozambique | BovineMeat           | 2013 | kg | 1.04   |      |  |
| Mozambique | ButterGhee           | 2013 | kg | 0.01   |      |  |
| Mozambique | Cephalopods          | 2013 | kg | 0.04   |      |  |
| Mozambique | Cheese               | 2013 | kg | 0.03   |      |  |
| Mozambique | Cream                | 2013 | kg | 0.02   |      |  |
| Mozambique | DemersalFish         | 2013 | kg | 0.03   |      |  |
| Mozambique | Eggs                 | 2013 | kg | 1.7    |      |  |
| Mozambique | FreshwaterFish       | 2013 | kg | 2.81   |      |  |
| Mozambique | Honey                | 2013 | kg | 0.02   |      |  |
| Mozambique | MarineFishOther      | 2013 | kg | 4.83   |      |  |
| Mozambique | Milkwhole            | 2013 | kg | 3.98   |      |  |
| Mozambique | Pigmeat              | 2013 | kg | 5.13   |      |  |
| Mozambique | PoultryMeat          | 2013 | kg | 1.41   |      |  |
| Myanmar    | AquaticAnimalsothers | 2013 | kg | 0.01   |      |  |
| Myanmar    | AquaticPlants        | 2013 | kg | 0      |      |  |

|              |                      |      |    |        |  |      |
|--------------|----------------------|------|----|--------|--|------|
| Myanmar      | BovineMeat           | 2013 | kg | 4.94   |  |      |
| Myanmar      | ButterGhee           | 2013 | kg | 0.58   |  |      |
| Myanmar      | Cephalopods          | 2013 | kg | 0      |  |      |
| Myanmar      | Cheese               | 2013 | kg | 1.63   |  |      |
| Myanmar      | Cream                | 2013 | kg | 0      |  |      |
| Myanmar      | DemersalFish         | 2013 | kg | 0.01   |  |      |
| Myanmar      | Eggs                 | 2013 | kg | 6.45   |  |      |
| Myanmar      | FreshwaterFish       | 2013 | kg | 25.77  |  |      |
| Myanmar      | Honey                | 2013 | kg | 0.01   |  |      |
| Myanmar      | MarineFishOther      | 2013 | kg | 28.19  |  |      |
| Myanmar      | Milkwhole            | 2013 | kg | 17.04  |  |      |
| Myanmar      | Pigmeat              | 2013 | kg | 11.31  |  |      |
| Myanmar      | PoultryMeat          | 2013 | kg | 21.87  |  |      |
| Namibia      | AquaticAnimalsothers | 2013 | kg | 0      |  |      |
| Namibia      | AquaticPlants        | 2013 | kg | 0      |  |      |
| Namibia      | BovineMeat           | 2013 | kg | 3.75   |  |      |
| Namibia      | ButterGhee           | 2013 | kg | 0.91   |  |      |
| Namibia      | Cephalopods          | 2013 | kg | 0.26   |  |      |
| Namibia      | Cheese               | 2013 | kg | 1.35   |  |      |
| Namibia      | Cream                | 2013 | kg | 0      |  |      |
| Namibia      | DemersalFish         | 2013 | kg | 5.24   |  |      |
| Namibia      | Eggs                 | 2013 | kg | 1.63   |  |      |
| Namibia      | FreshwaterFish       | 2013 | kg | 1.36   |  |      |
| Namibia      | Honey                | 2013 | kg | 0.02   |  |      |
| Namibia      | MarineFishOther      | 2013 | kg | 0.44   |  |      |
| Namibia      | Milkwhole            | 2013 | kg | 48.12  |  |      |
| Namibia      | Pigmeat              | 2013 | kg | 4.21   |  |      |
| Namibia      | PoultryMeat          | 2013 | kg | 12.19  |  |      |
| Namibia      | whey                 | 2013 | kg | 0.05   |  |      |
| Nepal        | AquaticPlants        | 2013 | kg | 0      |  |      |
| Nepal        | BovineMeat           | 2013 | kg | 7.89   |  |      |
| Nepal        | ButterGhee           | 2013 | kg | 0.96   |  |      |
| Nepal        | Cephalopods          | 2013 | kg | 0      |  |      |
| Nepal        | Cheese               | 2013 | kg | 0.01   |  |      |
| Nepal        | DemersalFish         | 2013 | kg | 0.02   |  |      |
| Nepal        | Eggs                 | 2013 | kg | 1.42   |  |      |
| Nepal        | FreshwaterFish       | 2013 | kg | 1.89   |  |      |
| Nepal        | Honey                | 2013 | kg | 0.06   |  |      |
| Nepal        | MarineFishOther      | 2013 | kg | 0.25   |  |      |
| Nepal        | Milkwhole            | 2013 | kg | 40.69  |  |      |
| Nepal        | Pigmeat              | 2013 | kg | 0.67   |  |      |
| Nepal        | PoultryMeat          | 2013 | kg | 1.56   |  |      |
| Nepal        | whey                 | 2013 | kg | 0.04   |  |      |
| Netherlands  | AquaticAnimalsothers | 2013 | kg | 0      |  | 0.21 |
| Netherlands  | AquaticPlants        | 2013 | kg | 0      |  |      |
| Netherlands  | BovineMeat           | 2013 | kg | 17.67  |  |      |
| Netherlands  | ButterGhee           | 2013 | kg | 1.28   |  |      |
| Netherlands  | Cephalopods          | 2013 | kg | 0.29   |  |      |
| Netherlands  | Cheese               | 2013 | kg | 17.69  |  |      |
| Netherlands  | Cream                | 2013 | kg | 0.05   |  |      |
| Netherlands  | DemersalFish         | 2013 | kg | 9.87   |  |      |
| Netherlands  | Eggs                 | 2013 | kg | 14.03  |  |      |
| Netherlands  | FreshwaterFish       | 2013 | kg | 2.93   |  |      |
| Netherlands  | Honey                | 2013 | kg | 0.59   |  |      |
| Netherlands  | MarineFishOther      | 2013 | kg | 0.01   |  |      |
| Netherlands  | Milkwhole            | 2013 | kg | 150.34 |  |      |
| Netherlands  | Pigmeat              | 2013 | kg | 36.36  |  |      |
| Netherlands  | PoultryMeat          | 2013 | kg | 23.9   |  |      |
| Netherlands  | whey                 | 2013 | kg | 0      |  |      |
| NewCaledonia | AquaticAnimalsothers | 2013 | kg | 0      |  | 0.61 |
| NewCaledonia | AquaticPlants        | 2013 | kg | 0      |  |      |
| NewCaledonia | BovineMeat           | 2013 | kg | 16.07  |  |      |
| NewCaledonia | ButterGhee           | 2013 | kg | 2.41   |  |      |
| NewCaledonia | Cephalopods          | 2013 | kg | 0.38   |  |      |
| NewCaledonia | Cheese               | 2013 | kg | 6.97   |  |      |
| NewCaledonia | Cream                | 2013 | kg | 9.14   |  |      |
| NewCaledonia | DemersalFish         | 2013 | kg | 0.66   |  |      |
| NewCaledonia | Eggs                 | 2013 | kg | 8.85   |  |      |
| NewCaledonia | FreshwaterFish       | 2013 | kg | 0.55   |  |      |
| NewCaledonia | Honey                | 2013 | kg | 0.42   |  |      |
| NewCaledonia | MarineFishOther      | 2013 | kg | 4.7    |  |      |
| NewCaledonia | Milkwhole            | 2013 | kg | 51.39  |  |      |
| NewCaledonia | Pigmeat              | 2013 | kg | 19.9   |  |      |
| NewCaledonia | PoultryMeat          | 2013 | kg | 44.36  |  |      |
| NewCaledonia | whey                 | 2013 | kg | 1.27   |  |      |
| NewZealand   | AquaticAnimalsothers | 2013 | kg | 0      |  | 0.23 |
| NewZealand   | AquaticPlants        | 2013 | kg | 0      |  |      |
| NewZealand   | BovineMeat           | 2013 | kg | 22.49  |  |      |
| NewZealand   | ButterGhee           | 2013 | kg | 9.25   |  |      |
| NewZealand   | Cephalopods          | 2013 | kg | 0.33   |  |      |
| NewZealand   | Cheese               | 2013 | kg | 8.69   |  |      |
| NewZealand   | Cream                | 2013 | kg | 0.19   |  |      |
| NewZealand   | DemersalFish         | 2013 | kg | 9.38   |  |      |
| NewZealand   | Eggs                 | 2013 | kg | 9.91   |  |      |
| NewZealand   | FreshwaterFish       | 2013 | kg | 2.08   |  |      |
| NewZealand   | Honey                | 2013 | kg | 2.02   |  |      |

CoronaAnimalProd\_FoodSupply\_10Sept\_2020.sas

|            |                      |      |    |        |      |
|------------|----------------------|------|----|--------|------|
| NewZealand | MarineFishOther      | 2013 | kg | 0.01   |      |
| NewZealand | Milkwhole            | 2013 | kg | 48.99  |      |
| NewZealand | Pigmeat              | 2013 | kg | 22.29  |      |
| NewZealand | PoultryMeat          | 2013 | kg | 34.98  |      |
| Nicaragua  | AquaticAnimalsOthers | 2013 | kg |        | 0.06 |
| Nicaragua  | AquaticPlants        | 2013 | kg | 0      |      |
| Nicaragua  | BovineMeat           | 2013 | kg | 4.73   |      |
| Nicaragua  | ButterGhee           | 2013 | kg | 0.14   |      |
| Nicaragua  | Cephalopods          | 2013 | kg | 0      |      |
| Nicaragua  | Cheese               | 2013 | kg | 3.03   |      |
| Nicaragua  | Cream                | 2013 | kg | 0      |      |
| Nicaragua  | DemersalFish         | 2013 | kg | 0.1    |      |
| Nicaragua  | Eggs                 | 2013 | kg | 4.9    |      |
| Nicaragua  | FreshwaterFish       | 2013 | kg | 0.16   |      |
| Nicaragua  | Honey                | 2013 | kg | 0.02   |      |
| Nicaragua  | MarineFishOther      | 2013 | kg |        | 0.1  |
| Nicaragua  | Milkwhole            | 2013 | kg | 59.25  |      |
| Nicaragua  | Pigmeat              | 2013 | kg | 3.38   |      |
| Nicaragua  | PoultryMeat          | 2013 | kg | 21.31  |      |
| Nicaragua  | whey                 | 2013 | kg | 0      |      |
| Niger      | AquaticPlants        | 2013 | kg | 0      |      |
| Niger      | BovineMeat           | 2013 | kg | 8.97   |      |
| Niger      | ButterGhee           | 2013 | kg | 0.79   |      |
| Niger      | Cephalopods          | 2013 | kg | 0      |      |
| Niger      | Cheese               | 2013 | kg | 3.31   |      |
| Niger      | Cream                | 2013 | kg | 0      |      |
| Niger      | DemersalFish         | 2013 | kg | 0.01   |      |
| Niger      | Eggs                 | 2013 | kg | 0.3    |      |
| Niger      | FreshwaterFish       | 2013 | kg | 2.57   |      |
| Niger      | Honey                | 2013 | kg | 0      |      |
| Niger      | MarineFishOther      | 2013 | kg |        | 0.05 |
| Niger      | Milkwhole            | 2013 | kg | 21.93  |      |
| Niger      | Pigmeat              | 2013 | kg | 0.09   |      |
| Niger      | PoultryMeat          | 2013 | kg | 1.08   |      |
| Nigeria    | AquaticPlants        | 2013 | kg | 0      |      |
| Nigeria    | BovineMeat           | 2013 | kg | 2.33   |      |
| Nigeria    | ButterGhee           | 2013 | kg | 0.1    |      |
| Nigeria    | Cephalopods          | 2013 | kg | 0.01   |      |
| Nigeria    | Cheese               | 2013 | kg | 0.06   |      |
| Nigeria    | Cream                | 2013 | kg | 0      |      |
| Nigeria    | DemersalFish         | 2013 | kg | 7.22   |      |
| Nigeria    | Eggs                 | 2013 | kg | 3.46   |      |
| Nigeria    | FreshwaterFish       | 2013 | kg | 3.01   |      |
| Nigeria    | Honey                | 2013 | kg | 0      |      |
| Nigeria    | MarineFishOther      | 2013 | kg |        | 0.31 |
| Nigeria    | Milkwhole            | 2013 | kg | 5.1    |      |
| Nigeria    | Pigmeat              | 2013 | kg | 1.47   |      |
| Nigeria    | PoultryMeat          | 2013 | kg | 1.73   |      |
| Nigeria    | whey                 | 2013 | kg | 0.55   |      |
| Norway     | AquaticAnimalsOthers | 2013 | kg |        | 0    |
| Norway     | AquaticPlants        | 2013 | kg | 0      |      |
| Norway     | BovineMeat           | 2013 | kg | 19.83  |      |
| Norway     | ButterGhee           | 2013 | kg | 3.17   |      |
| Norway     | Cephalopods          | 2013 | kg | 0.05   |      |
| Norway     | Cheese               | 2013 | kg | 14.59  |      |
| Norway     | Cream                | 2013 | kg | 7.14   |      |
| Norway     | DemersalFish         | 2013 | kg | 27.2   |      |
| Norway     | Eggs                 | 2013 | kg | 11.41  |      |
| Norway     | FreshwaterFish       | 2013 | kg | 6.08   |      |
| Norway     | Honey                | 2013 | kg | 0.39   |      |
| Norway     | MarineFishOther      | 2013 | kg |        | 0.05 |
| Norway     | Milkwhole            | 2013 | kg | 70.99  |      |
| Norway     | Pigmeat              | 2013 | kg | 23.51  |      |
| Norway     | PoultryMeat          | 2013 | kg | 21.01  |      |
| Oman       | AquaticPlants        | 2013 | kg | 0      |      |
| Oman       | BovineMeat           | 2013 | kg | 15.1   |      |
| Oman       | ButterGhee           | 2013 | kg | 0.54   |      |
| Oman       | Cephalopods          | 2013 | kg | 0.19   |      |
| Oman       | Cheese               | 2013 | kg | 4.36   |      |
| Oman       | Cream                | 2013 | kg | 0.08   |      |
| Oman       | DemersalFish         | 2013 | kg | 13.65  |      |
| Oman       | Eggs                 | 2013 | kg | 7.8    |      |
| Oman       | FreshwaterFish       | 2013 | kg | 0.18   |      |
| Oman       | Honey                | 2013 | kg | 0.47   |      |
| Oman       | MarineFishOther      | 2013 | kg |        | 2.14 |
| Oman       | Milkwhole            | 2013 | kg | 113.91 |      |
| Oman       | Pigmeat              | 2013 | kg | 0.01   |      |
| Oman       | PoultryMeat          | 2013 | kg | 31.51  |      |
| Pakistan   | AquaticPlants        | 2013 | kg | 0      |      |
| Pakistan   | BovineMeat           | 2013 | kg | 8.82   |      |
| Pakistan   | ButterGhee           | 2013 | kg | 3.9    |      |
| Pakistan   | Cephalopods          | 2013 | kg | 0.04   |      |
| Pakistan   | Cheese               | 2013 | kg | 0.01   |      |
| Pakistan   | Cream                | 2013 | kg | 0.02   |      |
| Pakistan   | DemersalFish         | 2013 | kg | 0.19   |      |
| Pakistan   | Eggs                 | 2013 | kg | 2.95   |      |

|             |                      |      |    |        |  |
|-------------|----------------------|------|----|--------|--|
| Pakistan    | FreshwaterFish       | 2013 | kg | 1.37   |  |
| Pakistan    | Honey                | 2013 | kg | 0.02   |  |
| Pakistan    | MarineFishOther      | 2013 | kg | 0      |  |
| Pakistan    | Milkwhole            | 2013 | kg | 107.81 |  |
| Pakistan    | Pigmeat              | 2013 | kg | 0      |  |
| Pakistan    | PoultryMeat          | 2013 | kg | 5.01   |  |
| Panama      | AquaticAnimalsOthers | 2013 | kg | 0.01   |  |
| Panama      | AquaticPlants        | 2013 | kg | 0      |  |
| Panama      | BovineMeat           | 2013 | kg | 20.4   |  |
| Panama      | ButterGhee           | 2013 | kg | 0.55   |  |
| Panama      | Cephalopods          | 2013 | kg | 0.48   |  |
| Panama      | Cheese               | 2013 | kg | 5.92   |  |
| Panama      | Cream                | 2013 | kg | 0.05   |  |
| Panama      | DemersalFish         | 2013 | kg | 1.92   |  |
| Panama      | Eggs                 | 2013 | kg | 4.53   |  |
| Panama      | FreshwaterFish       | 2013 | kg | 0.72   |  |
| Panama      | Honey                | 2013 | kg | 0.03   |  |
| Panama      | MarineFishOther      | 2013 | kg | 0.92   |  |
| Panama      | Milkwhole            | 2013 | kg | 48.67  |  |
| Panama      | Pigmeat              | 2013 | kg | 13.48  |  |
| Panama      | PoultryMeat          | 2013 | kg | 30.81  |  |
| Paraguay    | AquaticPlants        | 2013 | kg | 0      |  |
| Paraguay    | BovineMeat           | 2013 | kg | 19.81  |  |
| Paraguay    | ButterGhee           | 2013 | kg | 0.12   |  |
| Paraguay    | Cephalopods          | 2013 | kg | 0      |  |
| Paraguay    | Cheese               | 2013 | kg | 0.27   |  |
| Paraguay    | Cream                | 2013 | kg | 0      |  |
| Paraguay    | DemersalFish         | 2013 | kg | 0      |  |
| Paraguay    | Eggs                 | 2013 | kg | 18.83  |  |
| Paraguay    | FreshwaterFish       | 2013 | kg | 3.23   |  |
| Paraguay    | Honey                | 2013 | kg | 0.26   |  |
| Paraguay    | MarineFishOther      | 2013 | kg | 0.13   |  |
| Paraguay    | Milkwhole            | 2013 | kg | 71.33  |  |
| Paraguay    | Pigmeat              | 2013 | kg | 26.24  |  |
| Paraguay    | PoultryMeat          | 2013 | kg | 6.39   |  |
| Peru        | AquaticAnimalsOthers | 2013 | kg | 0.02   |  |
| Peru        | AquaticPlants        | 2013 | kg | 0      |  |
| Peru        | BovineMeat           | 2013 | kg | 4.69   |  |
| Peru        | ButterGhee           | 2013 | kg | 0.16   |  |
| Peru        | Cephalopods          | 2013 | kg | 0.28   |  |
| Peru        | Cheese               | 2013 | kg | 0.85   |  |
| Peru        | Cream                | 2013 | kg | 0.03   |  |
| Peru        | DemersalFish         | 2013 | kg | 1.45   |  |
| Peru        | Eggs                 | 2013 | kg | 8.76   |  |
| Peru        | FreshwaterFish       | 2013 | kg | 1.96   |  |
| Peru        | Honey                | 2013 | kg | 0.05   |  |
| Peru        | MarineFishOther      | 2013 | kg | 0.36   |  |
| Peru        | MeatAquaticMammals   | 2013 | kg | 0      |  |
| Peru        | Milkwhole            | 2013 | kg | 48.29  |  |
| Peru        | Pigmeat              | 2013 | kg | 3.85   |  |
| Peru        | PoultryMeat          | 2013 | kg | 11.72  |  |
| Peru        | whey                 | 2013 | kg | 3.81   |  |
| Philippines | AquaticAnimalsOthers | 2013 | kg | 0.01   |  |
| Philippines | AquaticPlants        | 2013 | kg | 0      |  |
| Philippines | BovineMeat           | 2013 | kg | 4.06   |  |
| Philippines | ButterGhee           | 2013 | kg | 0.16   |  |
| Philippines | Cephalopods          | 2013 | kg | 0.68   |  |
| Philippines | Cheese               | 2013 | kg | 0.12   |  |
| Philippines | Cream                | 2013 | kg | 0.02   |  |
| Philippines | DemersalFish         | 2013 | kg | 4.24   |  |
| Philippines | Eggs                 | 2013 | kg | 4.02   |  |
| Philippines | FreshwaterFish       | 2013 | kg | 7.85   |  |
| Philippines | Honey                | 2013 | kg | 0      |  |
| Philippines | MarineFishOther      | 2013 | kg | 0.26   |  |
| Philippines | Milkwhole            | 2013 | kg | 2.8    |  |
| Philippines | Pigmeat              | 2013 | kg | 18.4   |  |
| Philippines | PoultryMeat          | 2013 | kg | 11.91  |  |
| Poland      | AquaticAnimalsOthers | 2013 | kg | 0      |  |
| Poland      | AquaticPlants        | 2013 | kg | 0      |  |
| Poland      | BovineMeat           | 2013 | kg | 2.32   |  |
| Poland      | ButterGhee           | 2013 | kg | 3.97   |  |
| Poland      | Cephalopods          | 2013 | kg | 0      |  |
| Poland      | Cheese               | 2013 | kg | 15.82  |  |
| Poland      | Cream                | 2013 | kg | 7.25   |  |
| Poland      | DemersalFish         | 2013 | kg | 4.13   |  |
| Poland      | Eggs                 | 2013 | kg | 7.53   |  |
| Poland      | FreshwaterFish       | 2013 | kg | 2      |  |
| Poland      | Honey                | 2013 | kg | 0.14   |  |
| Poland      | MarineFishOther      | 2013 | kg | 0      |  |
| Poland      | Milkwhole            | 2013 | kg | 37.92  |  |
| Poland      | Pigmeat              | 2013 | kg | 46.19  |  |
| Poland      | PoultryMeat          | 2013 | kg | 27.41  |  |
| Poland      | whey                 | 2013 | kg | 0.03   |  |
| Portugal    | AquaticAnimalsOthers | 2013 | kg | 0.01   |  |
| Portugal    | AquaticPlants        | 2013 | kg | 0      |  |
| Portugal    | BovineMeat           | 2013 | kg | 16.45  |  |

CoronaAnimalProd\_FoodSupply\_10Sept\_2020.sas

|                    |                      |      |    |        |  |   |
|--------------------|----------------------|------|----|--------|--|---|
| Portugal           | ButterGhee           | 2013 | kg | 2.21   |  |   |
| Portugal           | Cephalopods          | 2013 | kg | 2.23   |  |   |
| Portugal           | Cheese               | 2013 | kg | 9.36   |  |   |
| Portugal           | Cream                | 2013 | kg | 1.83   |  |   |
| Portugal           | DemersalFish         | 2013 | kg | 33.45  |  |   |
| Portugal           | Eggs                 | 2013 | kg | 9.05   |  |   |
| Portugal           | FreshwaterFish       | 2013 | kg | 3.19   |  |   |
| Portugal           | Honey                | 2013 | kg | 0.91   |  |   |
| Portugal           | MarineFishOther      | 2013 | kg | 1.62   |  |   |
| Portugal           | Milkwhole            | 2013 | kg | 47.05  |  |   |
| Portugal           | Pigmeat              | 2013 | kg | 37.91  |  |   |
| Portugal           | PoultryMeat          | 2013 | kg | 30.14  |  |   |
| S.Korea            | AquaticAnimalsothers | 2013 | kg | 0.69   |  |   |
| S.Korea            | AquaticPlants        | 2013 | kg | 22.41  |  |   |
| S.Korea            | BovineMeat           | 2013 | kg | 14.53  |  |   |
| S.Korea            | ButterGhee           | 2013 | kg | 1.3    |  |   |
| S.Korea            | Cephalopods          | 2013 | kg | 6.7    |  |   |
| S.Korea            | Cheese               | 2013 | kg | 1.69   |  |   |
| S.Korea            | Cream                | 2013 | kg | 0.17   |  |   |
| S.Korea            | DemersalFish         | 2013 | kg | 17.45  |  |   |
| S.Korea            | Eggs                 | 2013 | kg | 11.24  |  |   |
| S.Korea            | FreshwaterFish       | 2013 | kg | 1.34   |  |   |
| S.Korea            | Honey                | 2013 | kg | 0.51   |  |   |
| S.Korea            | MarineFishOther      | 2013 | kg | 0.45   |  |   |
| S.Korea            | Milkwhole            | 2013 | kg | 7.3    |  |   |
| S.Korea            | Pigmeat              | 2013 | kg | 32.76  |  |   |
| S.Korea            | PoultryMeat          | 2013 | kg | 16     |  |   |
| Moldova            | AquaticAnimalsothers | 2013 | kg | 0      |  | 0 |
| Moldova            | AquaticPlants        | 2013 | kg | 0      |  |   |
| Moldova            | BovineMeat           | 2013 | kg | 1.56   |  |   |
| Moldova            | ButterGhee           | 2013 | kg | 1.26   |  |   |
| Moldova            | Cephalopods          | 2013 | kg | 0.03   |  |   |
| Moldova            | Cheese               | 2013 | kg | 2.96   |  |   |
| Moldova            | Cream                | 2013 | kg | 0.31   |  |   |
| Moldova            | DemersalFish         | 2013 | kg | 1.95   |  |   |
| Moldova            | Eggs                 | 2013 | kg | 9.79   |  |   |
| Moldova            | FreshwaterFish       | 2013 | kg | 3.89   |  |   |
| Moldova            | Honey                | 2013 | kg | 0.7    |  |   |
| Moldova            | MarineFishOther      | 2013 | kg | 1.67   |  |   |
| Moldova            | Milkwhole            | 2013 | kg | 110.05 |  |   |
| Moldova            | Pigmeat              | 2013 | kg | 19.83  |  |   |
| Moldova            | PoultryMeat          | 2013 | kg | 17.93  |  |   |
| Romania            | AquaticAnimalsothers | 2013 | kg | 0.01   |  |   |
| Romania            | AquaticPlants        | 2013 | kg | 0      |  |   |
| Romania            | BovineMeat           | 2013 | kg | 4.78   |  |   |
| Romania            | ButterGhee           | 2013 | kg | 0.66   |  |   |
| Romania            | Cephalopods          | 2013 | kg | 0.02   |  |   |
| Romania            | Cheese               | 2013 | kg | 5.22   |  |   |
| Romania            | Cream                | 2013 | kg | 0.08   |  |   |
| Romania            | DemersalFish         | 2013 | kg | 0.65   |  |   |
| Romania            | Eggs                 | 2013 | kg | 12.94  |  |   |
| Romania            | FreshwaterFish       | 2013 | kg | 2.37   |  |   |
| Romania            | Honey                | 2013 | kg | 0.78   |  |   |
| Romania            | MarineFishOther      | 2013 | kg | 0.52   |  |   |
| Romania            | Milkwhole            | 2013 | kg | 202.62 |  |   |
| Romania            | Pigmeat              | 2013 | kg | 25.31  |  |   |
| Romania            | PoultryMeat          | 2013 | kg | 15.38  |  |   |
| Russia             | AquaticAnimalsothers | 2013 | kg | 0.01   |  |   |
| Russia             | AquaticPlants        | 2013 | kg | 0      |  |   |
| Russia             | BovineMeat           | 2013 | kg | 16.98  |  |   |
| Russia             | ButterGhee           | 2013 | kg | 2.58   |  |   |
| Russia             | Cephalopods          | 2013 | kg | 0.77   |  |   |
| Russia             | Cheese               | 2013 | kg | 7.13   |  |   |
| Russia             | Cream                | 2013 | kg | 2.52   |  |   |
| Russia             | DemersalFish         | 2013 | kg | 7.6    |  |   |
| Russia             | Eggs                 | 2013 | kg | 15.43  |  |   |
| Russia             | FreshwaterFish       | 2013 | kg | 6.86   |  |   |
| Russia             | Honey                | 2013 | kg | 0.48   |  |   |
| Russia             | MarineFishOther      | 2013 | kg | 0      |  |   |
| Russia             | Milkwhole            | 2013 | kg | 101.5  |  |   |
| Russia             | Pigmeat              | 2013 | kg | 25.66  |  |   |
| Russia             | PoultryMeat          | 2013 | kg | 27.5   |  |   |
| Rwanda             | BovineMeat           | 2013 | kg | 2.53   |  |   |
| Rwanda             | ButterGhee           | 2013 | kg | 0.12   |  |   |
| Rwanda             | Cephalopods          | 2013 | kg | 0      |  |   |
| Rwanda             | Cheese               | 2013 | kg | 0      |  |   |
| Rwanda             | Cream                | 2013 | kg | 0      |  |   |
| Rwanda             | DemersalFish         | 2013 | kg | 0.02   |  |   |
| Rwanda             | Eggs                 | 2013 | kg | 0.16   |  |   |
| Rwanda             | FreshwaterFish       | 2013 | kg | 1.48   |  |   |
| Rwanda             | Honey                | 2013 | kg | 0.04   |  |   |
| Rwanda             | MarineFishOther      | 2013 | kg | 2.19   |  |   |
| Rwanda             | Milkwhole            | 2013 | kg | 4.1    |  |   |
| Rwanda             | Pigmeat              | 2013 | kg | 0.76   |  |   |
| Rwanda             | PoultryMeat          | 2013 | kg | 1.34   |  |   |
| SaintKittsandNevis | AquaticPlants        | 2013 | kg | 0      |  |   |

CoronaAnimalProd\_FoodSupply\_10Sept\_2020.sas

|                              |                      |      |    |       |  |  |   |
|------------------------------|----------------------|------|----|-------|--|--|---|
| SaintKittsandNevis           | BovineMeat           | 2013 | kg | 10.06 |  |  |   |
| SaintKittsandNevis           | ButterGhee           | 2013 | kg | 0.41  |  |  |   |
| SaintKittsandNevis           | Cephalopods          | 2013 | kg | 0.02  |  |  |   |
| SaintKittsandNevis           | Cheese               | 2013 | kg | 4.06  |  |  |   |
| SaintKittsandNevis           | Cream                | 2013 | kg | 0     |  |  |   |
| SaintKittsandNevis           | DemersalFish         | 2013 | kg | 4.33  |  |  |   |
| SaintKittsandNevis           | Eggs                 | 2013 | kg | 3.52  |  |  |   |
| SaintKittsandNevis           | FreshwaterFish       | 2013 | kg | 0.66  |  |  |   |
| SaintKittsandNevis           | MarineFishOther      | 2013 | kg | 17.26 |  |  |   |
| SaintKittsandNevis           | Milkwhole            | 2013 | kg | 37.51 |  |  |   |
| SaintKittsandNevis           | Pigmeat              | 2013 | kg | 6.36  |  |  |   |
| SaintKittsandNevis           | PoultryMeat          | 2013 | kg | 56.7  |  |  |   |
| SaintLucia                   | AquaticPlants        | 2013 | kg | 0     |  |  |   |
| SaintLucia                   | BovineMeat           | 2013 | kg | 6.02  |  |  |   |
| SaintLucia                   | ButterGhee           | 2013 | kg | 0.71  |  |  |   |
| SaintLucia                   | Cephalopods          | 2013 | kg | 0.15  |  |  |   |
| SaintLucia                   | Cheese               | 2013 | kg | 4.55  |  |  |   |
| SaintLucia                   | Cream                | 2013 | kg | 0.32  |  |  |   |
| SaintLucia                   | DemersalFish         | 2013 | kg | 1.62  |  |  |   |
| SaintLucia                   | Eggs                 | 2013 | kg | 3.2   |  |  |   |
| SaintLucia                   | FreshwaterFish       | 2013 | kg | 0.11  |  |  |   |
| SaintLucia                   | Honey                | 2013 | kg | 0     |  |  |   |
| SaintLucia                   | MarineFishOther      | 2013 | kg | 7.2   |  |  |   |
| SaintLucia                   | Milkwhole            | 2013 | kg | 47.8  |  |  |   |
| SaintLucia                   | Pigmeat              | 2013 | kg | 21.43 |  |  |   |
| SaintLucia                   | PoultryMeat          | 2013 | kg | 69.52 |  |  |   |
| SaintVincentandtheGrenadines | AquaticAnimalsOthers | 2013 | kg | 0     |  |  | 0 |
| SaintVincentandtheGrenadines | AquaticPlants        | 2013 | kg | 0     |  |  |   |
| SaintVincentandtheGrenadines | BovineMeat           | 2013 | kg | 9.37  |  |  |   |
| SaintVincentandtheGrenadines | ButterGhee           | 2013 | kg | 0.19  |  |  |   |
| SaintVincentandtheGrenadines | Cephalopods          | 2013 | kg | 0     |  |  |   |
| SaintVincentandtheGrenadines | Cheese               | 2013 | kg | 2.61  |  |  |   |
| SaintVincentandtheGrenadines | Cream                | 2013 | kg | 0.06  |  |  |   |
| SaintVincentandtheGrenadines | DemersalFish         | 2013 | kg | 2.22  |  |  |   |
| SaintVincentandtheGrenadines | Eggs                 | 2013 | kg | 5.32  |  |  |   |
| SaintVincentandtheGrenadines | FreshwaterFish       | 2013 | kg | 0.17  |  |  |   |
| SaintVincentandtheGrenadines | Honey                | 2013 | kg | 0     |  |  |   |
| SaintVincentandtheGrenadines | MarineFishOther      | 2013 | kg | 9.15  |  |  |   |
| SaintVincentandtheGrenadines | Milkwhole            | 2013 | kg | 47.22 |  |  |   |
| SaintVincentandtheGrenadines | Pigmeat              | 2013 | kg | 12.47 |  |  |   |
| SaintVincentandtheGrenadines | PoultryMeat          | 2013 | kg | 72.87 |  |  |   |
| Samoa                        | AquaticAnimalsOthers | 2013 | kg | 2.23  |  |  |   |
| Samoa                        | AquaticPlants        | 2013 | kg | 0     |  |  |   |
| Samoa                        | BovineMeat           | 2013 | kg | 10.38 |  |  |   |
| Samoa                        | ButterGhee           | 2013 | kg | 1.34  |  |  |   |
| Samoa                        | Cephalopods          | 2013 | kg | 0.26  |  |  |   |
| Samoa                        | Cheese               | 2013 | kg | 0.69  |  |  |   |
| Samoa                        | Cream                | 2013 | kg | 0.02  |  |  |   |
| Samoa                        | DemersalFish         | 2013 | kg | 0     |  |  |   |
| Samoa                        | Eggs                 | 2013 | kg | 2.31  |  |  |   |
| Samoa                        | FreshwaterFish       | 2013 | kg | 0.16  |  |  |   |
| Samoa                        | Honey                | 2013 | kg | 1.07  |  |  |   |
| Samoa                        | MarineFishOther      | 2013 | kg | 4.96  |  |  |   |
| Samoa                        | Milkwhole            | 2013 | kg | 29.86 |  |  |   |
| Samoa                        | Pigmeat              | 2013 | kg | 23.56 |  |  |   |
| Samoa                        | PoultryMeat          | 2013 | kg | 63.81 |  |  |   |
| SaoTomeandPrincipe           | BovineMeat           | 2013 | kg | 1.25  |  |  |   |
| SaoTomeandPrincipe           | ButterGhee           | 2013 | kg | 0.25  |  |  |   |
| SaoTomeandPrincipe           | Cephalopods          | 2013 | kg | 0     |  |  |   |
| SaoTomeandPrincipe           | Cheese               | 2013 | kg | 0.17  |  |  |   |
| SaoTomeandPrincipe           | Cream                | 2013 | kg | 0     |  |  |   |
| SaoTomeandPrincipe           | DemersalFish         | 2013 | kg | 5.74  |  |  |   |
| SaoTomeandPrincipe           | Eggs                 | 2013 | kg | 2.84  |  |  |   |
| SaoTomeandPrincipe           | FreshwaterFish       | 2013 | kg | 0.19  |  |  |   |
| SaoTomeandPrincipe           | MarineFishOther      | 2013 | kg | 3.23  |  |  |   |
| SaoTomeandPrincipe           | Milkwhole            | 2013 | kg | 11.93 |  |  |   |
| SaoTomeandPrincipe           | Pigmeat              | 2013 | kg | 5.55  |  |  |   |
| SaoTomeandPrincipe           | PoultryMeat          | 2013 | kg | 9.24  |  |  |   |
| SaoTomeandPrincipe           | whey                 | 2013 | kg | 0.07  |  |  |   |
| SaudiArabia                  | AquaticAnimalsOthers | 2013 | kg | 0     |  |  |   |
| SaudiArabia                  | AquaticPlants        | 2013 | kg | 0     |  |  |   |
| SaudiArabia                  | BovineMeat           | 2013 | kg | 6.45  |  |  |   |
| SaudiArabia                  | ButterGhee           | 2013 | kg | 1.84  |  |  |   |
| SaudiArabia                  | Cephalopods          | 2013 | kg | 0.08  |  |  |   |
| SaudiArabia                  | Cheese               | 2013 | kg | 6.06  |  |  |   |
| SaudiArabia                  | Cream                | 2013 | kg | 2.39  |  |  |   |
| SaudiArabia                  | DemersalFish         | 2013 | kg | 1.36  |  |  |   |
| SaudiArabia                  | Eggs                 | 2013 | kg | 5.37  |  |  |   |
| SaudiArabia                  | FreshwaterFish       | 2013 | kg | 4.69  |  |  |   |
| SaudiArabia                  | Honey                | 2013 | kg | 0.44  |  |  |   |
| SaudiArabia                  | MarineFishOther      | 2013 | kg | 0.72  |  |  |   |
| SaudiArabia                  | Milkwhole            | 2013 | kg | 30.73 |  |  |   |
| SaudiArabia                  | PoultryMeat          | 2013 | kg | 49.05 |  |  |   |
| Senegal                      | AquaticPlants        | 2013 | kg | 0     |  |  |   |
| Senegal                      | BovineMeat           | 2013 | kg | 5.85  |  |  |   |
| Senegal                      | ButterGhee           | 2013 | kg | 0.11  |  |  |   |



|                |                      |      |    |       |  |  |
|----------------|----------------------|------|----|-------|--|--|
| Senegal        | Cephalopods          | 2013 | kg | 0.01  |  |  |
| Senegal        | Cheese               | 2013 | kg | 0.14  |  |  |
| Senegal        | Cream                | 2013 | kg | 0.03  |  |  |
| Senegal        | DemersalFish         | 2013 | kg | 5.73  |  |  |
| Senegal        | Eggs                 | 2013 | kg | 1.63  |  |  |
| Senegal        | FreshwaterFish       | 2013 | kg | 2.44  |  |  |
| Senegal        | Honey                | 2013 | kg | 0.22  |  |  |
| Senegal        | MarineFishOther      | 2013 | kg | 0.28  |  |  |
| Senegal        | Milkwhole            | 2013 | kg | 14.3  |  |  |
| Senegal        | Pigmeat              | 2013 | kg | 0.94  |  |  |
| Senegal        | PoultryMeat          | 2013 | kg | 4.62  |  |  |
| Senegal        | whey                 | 2013 | kg | 0.11  |  |  |
| Serbia         | AquaticAnimalsOthers | 2013 | kg | 0     |  |  |
| Serbia         | AquaticPlants        | 2013 | kg | 0     |  |  |
| Serbia         | BovineMeat           | 2013 | kg | 7.05  |  |  |
| Serbia         | ButterGhee           | 2013 | kg | 0.28  |  |  |
| Serbia         | Cephalopods          | 2013 | kg | 0.17  |  |  |
| Serbia         | Cheese               | 2013 | kg | 2.76  |  |  |
| Serbia         | Cream                | 2013 | kg | 0.12  |  |  |
| Serbia         | DemersalFish         | 2013 | kg | 1.03  |  |  |
| Serbia         | Eggs                 | 2013 | kg | 8.89  |  |  |
| Serbia         | FreshwaterFish       | 2013 | kg | 2.29  |  |  |
| Serbia         | Honey                | 2013 | kg | 0.55  |  |  |
| Serbia         | MarineFishOther      | 2013 | kg | 0.28  |  |  |
| Serbia         | Milkwhole            | 2013 | kg | 115.6 |  |  |
| Serbia         | Pigmeat              | 2013 | kg | 32.04 |  |  |
| Serbia         | PoultryMeat          | 2013 | kg | 10.64 |  |  |
| Serbia         | whey                 | 2013 | kg | 0     |  |  |
| SierraLeone    | AquaticPlants        | 2013 | kg | 0     |  |  |
| SierraLeone    | BovineMeat           | 2013 | kg | 1.99  |  |  |
| SierraLeone    | ButterGhee           | 2013 | kg | 0     |  |  |
| SierraLeone    | Cephalopods          | 2013 | kg | 0.03  |  |  |
| SierraLeone    | Cheese               | 2013 | kg | 0.07  |  |  |
| SierraLeone    | Cream                | 2013 | kg | 0     |  |  |
| SierraLeone    | DemersalFish         | 2013 | kg | 7.87  |  |  |
| SierraLeone    | Eggs                 | 2013 | kg | 1.92  |  |  |
| SierraLeone    | FreshwaterFish       | 2013 | kg | 3.54  |  |  |
| SierraLeone    | Honey                | 2013 | kg | 0.14  |  |  |
| SierraLeone    | MarineFishOther      | 2013 | kg | 1     |  |  |
| SierraLeone    | Milkwhole            | 2013 | kg | 6.32  |  |  |
| SierraLeone    | Pigmeat              | 2013 | kg | 1.22  |  |  |
| SierraLeone    | PoultryMeat          | 2013 | kg | 4.97  |  |  |
| Slovakia       | AquaticAnimalsOthers | 2013 | kg | 0     |  |  |
| Slovakia       | AquaticPlants        | 2013 | kg | 0     |  |  |
| Slovakia       | BovineMeat           | 2013 | kg | 5.19  |  |  |
| Slovakia       | ButterGhee           | 2013 | kg | 2.65  |  |  |
| Slovakia       | Cephalopods          | 2013 | kg | 0.01  |  |  |
| Slovakia       | Cheese               | 2013 | kg | 11.27 |  |  |
| Slovakia       | Cream                | 2013 | kg | 1.41  |  |  |
| Slovakia       | DemersalFish         | 2013 | kg | 3.27  |  |  |
| Slovakia       | Eggs                 | 2013 | kg | 16.05 |  |  |
| Slovakia       | FreshwaterFish       | 2013 | kg | 1.95  |  |  |
| Slovakia       | Honey                | 2013 | kg | 1.1   |  |  |
| Slovakia       | MarineFishOther      | 2013 | kg | 0.35  |  |  |
| Slovakia       | Milkwhole            | 2013 | kg | 43.16 |  |  |
| Slovakia       | Pigmeat              | 2013 | kg | 31.78 |  |  |
| Slovakia       | PoultryMeat          | 2013 | kg | 15.13 |  |  |
| Slovenia       | AquaticAnimalsOthers | 2013 | kg | 0.07  |  |  |
| Slovenia       | AquaticPlants        | 2013 | kg | 0     |  |  |
| Slovenia       | BovineMeat           | 2013 | kg | 18.43 |  |  |
| Slovenia       | ButterGhee           | 2013 | kg | 2.65  |  |  |
| Slovenia       | Cephalopods          | 2013 | kg | 1.57  |  |  |
| Slovenia       | Cheese               | 2013 | kg | 13.99 |  |  |
| Slovenia       | Cream                | 2013 | kg | 8.47  |  |  |
| Slovenia       | DemersalFish         | 2013 | kg | 2.33  |  |  |
| Slovenia       | Eggs                 | 2013 | kg | 9.36  |  |  |
| Slovenia       | FreshwaterFish       | 2013 | kg | 2.37  |  |  |
| Slovenia       | Honey                | 2013 | kg | 1.61  |  |  |
| Slovenia       | MarineFishOther      | 2013 | kg | 0.35  |  |  |
| Slovenia       | Milkwhole            | 2013 | kg | 32.06 |  |  |
| Slovenia       | Pigmeat              | 2013 | kg | 28.19 |  |  |
| Slovenia       | PoultryMeat          | 2013 | kg | 23.46 |  |  |
| SolomonIslands | AquaticAnimalsOthers | 2013 | kg | 0     |  |  |
| SolomonIslands | AquaticPlants        | 2013 | kg | 0     |  |  |
| SolomonIslands | BovineMeat           | 2013 | kg | 5.57  |  |  |
| SolomonIslands | ButterGhee           | 2013 | kg | 0.07  |  |  |
| SolomonIslands | Cephalopods          | 2013 | kg | 0     |  |  |
| SolomonIslands | Cheese               | 2013 | kg | 0.09  |  |  |
| SolomonIslands | Cream                | 2013 | kg | 0.02  |  |  |
| SolomonIslands | DemersalFish         | 2013 | kg | 0.02  |  |  |
| SolomonIslands | Eggs                 | 2013 | kg | 1.28  |  |  |
| SolomonIslands | FreshwaterFish       | 2013 | kg | 0     |  |  |
| SolomonIslands | MarineFishOther      | 2013 | kg | 19.01 |  |  |
| SolomonIslands | Milkwhole            | 2013 | kg | 6.24  |  |  |
| SolomonIslands | Pigmeat              | 2013 | kg | 4.7   |  |  |
| SolomonIslands | PoultryMeat          | 2013 | kg | 3.34  |  |  |

|                |                      |      |    |        |  |  |
|----------------|----------------------|------|----|--------|--|--|
| SolomonIslands | whey                 | 2013 | kg | 0.06   |  |  |
| SouthAfrica    | AquaticAnimalsOthers | 2013 | kg | 0      |  |  |
| SouthAfrica    | AquaticPlants        | 2013 | kg | 0      |  |  |
| SouthAfrica    | BovineMeat           | 2013 | kg | 18.03  |  |  |
| SouthAfrica    | ButterGhee           | 2013 | kg | 0.35   |  |  |
| SouthAfrica    | Cephalopods          | 2013 | kg | 0.12   |  |  |
| SouthAfrica    | Cheese               | 2013 | kg | 1.67   |  |  |
| SouthAfrica    | Cream                | 2013 | kg | 0.05   |  |  |
| SouthAfrica    | DemersalFish         | 2013 | kg | 2.16   |  |  |
| SouthAfrica    | Eggs                 | 2013 | kg | 7.21   |  |  |
| SouthAfrica    | FreshwaterFish       | 2013 | kg | 0.19   |  |  |
| SouthAfrica    | Honey                | 2013 | kg | 0.06   |  |  |
| SouthAfrica    | MarineFishOther      | 2013 | kg | 0.07   |  |  |
| SouthAfrica    | Milkwhole            | 2013 | kg | 36.32  |  |  |
| SouthAfrica    | Pigmeat              | 2013 | kg | 4.16   |  |  |
| SouthAfrica    | PoultryMeat          | 2013 | kg | 37.57  |  |  |
| SouthAfrica    | whey                 | 2013 | kg | 0      |  |  |
| Spain          | AquaticAnimalsOthers | 2013 | kg | 0.06   |  |  |
| Spain          | AquaticPlants        | 2013 | kg | 0      |  |  |
| Spain          | BovineMeat           | 2013 | kg | 12.15  |  |  |
| Spain          | ButterGhee           | 2013 | kg | 0.74   |  |  |
| Spain          | Cephalopods          | 2013 | kg | 3.2    |  |  |
| Spain          | Cheese               | 2013 | kg | 8.93   |  |  |
| Spain          | Cream                | 2013 | kg | 1.89   |  |  |
| Spain          | DemersalFish         | 2013 | kg | 13.65  |  |  |
| Spain          | Eggs                 | 2013 | kg | 13.32  |  |  |
| Spain          | FreshwaterFish       | 2013 | kg | 3.86   |  |  |
| Spain          | Honey                | 2013 | kg | 0.66   |  |  |
| Spain          | MarineFishOther      | 2013 | kg | 0.91   |  |  |
| Spain          | Milkwhole            | 2013 | kg | 84.31  |  |  |
| Spain          | Pigmeat              | 2013 | kg | 48.92  |  |  |
| Spain          | PoultryMeat          | 2013 | kg | 28.63  |  |  |
| SriLanka       | AquaticAnimalsOthers | 2013 | kg | 0.18   |  |  |
| SriLanka       | AquaticPlants        | 2013 | kg | 0      |  |  |
| SriLanka       | BovineMeat           | 2013 | kg | 1.38   |  |  |
| SriLanka       | ButterGhee           | 2013 | kg | 0.06   |  |  |
| SriLanka       | Cephalopods          | 2013 | kg | 0.02   |  |  |
| SriLanka       | Cheese               | 2013 | kg | 0.06   |  |  |
| SriLanka       | Cream                | 2013 | kg | 0.01   |  |  |
| SriLanka       | DemersalFish         | 2013 | kg | 1.73   |  |  |
| SriLanka       | Eggs                 | 2013 | kg | 4.57   |  |  |
| SriLanka       | FreshwaterFish       | 2013 | kg | 3.2    |  |  |
| SriLanka       | Honey                | 2013 | kg | 0      |  |  |
| SriLanka       | MarineFishOther      | 2013 | kg | 1.06   |  |  |
| SriLanka       | Milkwhole            | 2013 | kg | 30.36  |  |  |
| SriLanka       | Pigmeat              | 2013 | kg | 0.05   |  |  |
| SriLanka       | PoultryMeat          | 2013 | kg | 4.96   |  |  |
| SriLanka       | whey                 | 2013 | kg | 0      |  |  |
| Sudan          | BovineMeat           | 2013 | kg | 10.78  |  |  |
| Sudan          | ButterGhee           | 2013 | kg | 0.26   |  |  |
| Sudan          | Cheese               | 2013 | kg | 2.85   |  |  |
| Sudan          | Cream                | 2013 | kg | 0      |  |  |
| Sudan          | DemersalFish         | 2013 | kg | 0      |  |  |
| Sudan          | Eggs                 | 2013 | kg | 0.99   |  |  |
| Sudan          | FreshwaterFish       | 2013 | kg | 0.82   |  |  |
| Sudan          | Honey                | 2013 | kg | 0.02   |  |  |
| Sudan          | MarineFishOther      | 2013 | kg | 0.13   |  |  |
| Sudan          | Milkwhole            | 2013 | kg | 132.86 |  |  |
| Sudan          | PoultryMeat          | 2013 | kg | 1.25   |  |  |
| Sudan          | whey                 | 2013 | kg | 0.07   |  |  |
| Suriname       | AquaticPlants        | 2013 | kg | 0      |  |  |
| Suriname       | BovineMeat           | 2013 | kg | 9.73   |  |  |
| Suriname       | ButterGhee           | 2013 | kg | 0.35   |  |  |
| Suriname       | Cephalopods          | 2013 | kg | 0      |  |  |
| Suriname       | Cheese               | 2013 | kg | 1.45   |  |  |
| Suriname       | Cream                | 2013 | kg | 0.03   |  |  |
| Suriname       | DemersalFish         | 2013 | kg | 0.02   |  |  |
| Suriname       | Eggs                 | 2013 | kg | 3.93   |  |  |
| Suriname       | FreshwaterFish       | 2013 | kg | 0.9    |  |  |
| Suriname       | Honey                | 2013 | kg | 0.05   |  |  |
| Suriname       | MarineFishOther      | 2013 | kg | 6.9    |  |  |
| Suriname       | Milkwhole            | 2013 | kg | 25.53  |  |  |
| Suriname       | Pigmeat              | 2013 | kg | 10.23  |  |  |
| Suriname       | PoultryMeat          | 2013 | kg | 35.55  |  |  |
| Eswatini       | AquaticPlants        | 2013 | kg | 0      |  |  |
| Eswatini       | BovineMeat           | 2013 | kg | 15.1   |  |  |
| Eswatini       | ButterGhee           | 2013 | kg | 0.22   |  |  |
| Eswatini       | Cephalopods          | 2013 | kg | 0      |  |  |
| Eswatini       | Cheese               | 2013 | kg | 1.28   |  |  |
| Eswatini       | Cream                | 2013 | kg | 0.34   |  |  |
| Eswatini       | DemersalFish         | 2013 | kg | 0      |  |  |
| Eswatini       | Eggs                 | 2013 | kg | 1.5    |  |  |
| Eswatini       | FreshwaterFish       | 2013 | kg | 0.47   |  |  |
| Eswatini       | Honey                | 2013 | kg | 0      |  |  |
| Eswatini       | MarineFishOther      | 2013 | kg | 0.31   |  |  |
| Eswatini       | Milkwhole            | 2013 | kg | 47.99  |  |  |

CoronaAnimalProd\_FoodSupply\_10Sept\_2020.sas

|                |                      |      |    |        |  |      |
|----------------|----------------------|------|----|--------|--|------|
| Eswatini       | Pigmeat              | 2013 | kg | 2.43   |  |      |
| Eswatini       | PoultryMeat          | 2013 | kg | 6.18   |  |      |
| Eswatini       | Whey                 | 2013 | kg | 6.05   |  |      |
| Sweden         | AquaticAnimalsOthers | 2013 | kg | 0      |  | 0    |
| Sweden         | AquaticPlants        | 2013 | kg | 0      |  |      |
| Sweden         | BovineMeat           | 2013 | kg | 24.58  |  |      |
| Sweden         | ButterGhee           | 2013 | kg | 4.35   |  |      |
| Sweden         | Cephalopods          | 2013 | kg | 0.08   |  |      |
| Sweden         | Cheese               | 2013 | kg | 19.82  |  |      |
| Sweden         | Cream                | 2013 | kg | 11.55  |  |      |
| Sweden         | DemersalFish         | 2013 | kg | 9.52   |  |      |
| Sweden         | Eggs                 | 2013 | kg | 13.37  |  |      |
| Sweden         | FreshwaterFish       | 2013 | kg | 8.97   |  |      |
| Sweden         | Honey                | 2013 | kg | 0.84   |  |      |
| Sweden         | MarineFishOther      | 2013 | kg | 0.66   |  |      |
| Sweden         | Milkwhole            | 2013 | kg | 52.64  |  |      |
| Sweden         | Pigmeat              | 2013 | kg | 37     |  |      |
| Sweden         | PoultryMeat          | 2013 | kg | 16.64  |  |      |
| Sweden         | whey                 | 2013 | kg | 0.1    |  |      |
| Switzerland    | AquaticAnimalsOthers | 2013 | kg | 0      |  | 0.04 |
| Switzerland    | AquaticPlants        | 2013 | kg | 0      |  |      |
| Switzerland    | BovineMeat           | 2013 | kg | 21.26  |  |      |
| Switzerland    | ButterGhee           | 2013 | kg | 5.6    |  |      |
| Switzerland    | Cephalopods          | 2013 | kg | 0.41   |  |      |
| Switzerland    | Cheese               | 2013 | kg | 19.79  |  |      |
| Switzerland    | Cream                | 2013 | kg | 4.94   |  |      |
| Switzerland    | DemersalFish         | 2013 | kg | 2.76   |  |      |
| Switzerland    | Eggs                 | 2013 | kg | 10.53  |  |      |
| Switzerland    | FreshwaterFish       | 2013 | kg | 6.16   |  |      |
| Switzerland    | Honey                | 2013 | kg | 1.41   |  |      |
| Switzerland    | MarineFishOther      | 2013 | kg | 1.76   |  |      |
| Switzerland    | Milkwhole            | 2013 | kg | 108.26 |  |      |
| Switzerland    | Pigmeat              | 2013 | kg | 31.49  |  |      |
| Switzerland    | PoultryMeat          | 2013 | kg | 16.38  |  |      |
| Tajikistan     | AquaticPlants        | 2013 | kg | 0      |  |      |
| Tajikistan     | BovineMeat           | 2013 | kg | 4.35   |  |      |
| Tajikistan     | ButterGhee           | 2013 | kg | 0.03   |  |      |
| Tajikistan     | Cephalopods          | 2013 | kg | 0      |  |      |
| Tajikistan     | Cheese               | 2013 | kg | 2.66   |  |      |
| Tajikistan     | DemersalFish         | 2013 | kg | 0.01   |  |      |
| Tajikistan     | Eggs                 | 2013 | kg | 1.71   |  |      |
| Tajikistan     | FreshwaterFish       | 2013 | kg | 0.17   |  |      |
| Tajikistan     | Honey                | 2013 | kg | 0.43   |  |      |
| Tajikistan     | MarineFishOther      | 2013 | kg | 0.11   |  |      |
| Tajikistan     | Milkwhole            | 2013 | kg | 45.27  |  |      |
| Tajikistan     | Pigmeat              | 2013 | kg | 1.07   |  |      |
| Tajikistan     | PoultryMeat          | 2013 | kg | 2.6    |  |      |
| Thailand       | AquaticAnimalsOthers | 2013 | kg | 0      |  | 1.28 |
| Thailand       | AquaticPlants        | 2013 | kg | 0      |  |      |
| Thailand       | BovineMeat           | 2013 | kg | 2.56   |  |      |
| Thailand       | ButterGhee           | 2013 | kg | 0.17   |  |      |
| Thailand       | Cephalopods          | 2013 | kg | 2.12   |  |      |
| Thailand       | Cheese               | 2013 | kg | 0.2    |  |      |
| Thailand       | Cream                | 2013 | kg | 0.02   |  |      |
| Thailand       | DemersalFish         | 2013 | kg | 1      |  |      |
| Thailand       | Eggs                 | 2013 | kg | 12.35  |  |      |
| Thailand       | FreshwaterFish       | 2013 | kg | 8.32   |  |      |
| Thailand       | Honey                | 2013 | kg | 0.06   |  |      |
| Thailand       | MarineFishOther      | 2013 | kg | 0.21   |  |      |
| Thailand       | Milkwhole            | 2013 | kg | 17.01  |  |      |
| Thailand       | Pigmeat              | 2013 | kg | 13     |  |      |
| Thailand       | PoultryMeat          | 2013 | kg | 13.69  |  |      |
| Thailand       | whey                 | 2013 | kg | 0.41   |  |      |
| NorthMacedonia | AquaticAnimalsOthers | 2013 | kg | 0      |  | 0    |
| NorthMacedonia | AquaticPlants        | 2013 | kg | 0      |  |      |
| NorthMacedonia | BovineMeat           | 2013 | kg | 7.69   |  |      |
| NorthMacedonia | ButterGhee           | 2013 | kg | 3.1    |  |      |
| NorthMacedonia | Cephalopods          | 2013 | kg | 0.03   |  |      |
| NorthMacedonia | Cheese               | 2013 | kg | 4.64   |  |      |
| NorthMacedonia | Cream                | 2013 | kg | 0.06   |  |      |
| NorthMacedonia | DemersalFish         | 2013 | kg | 1.79   |  |      |
| NorthMacedonia | Eggs                 | 2013 | kg | 6.38   |  |      |
| NorthMacedonia | FreshwaterFish       | 2013 | kg | 1.11   |  |      |
| NorthMacedonia | Honey                | 2013 | kg | 0.42   |  |      |
| NorthMacedonia | MarineFishOther      | 2013 | kg | 0.28   |  |      |
| NorthMacedonia | Milkwhole            | 2013 | kg | 51.73  |  |      |
| NorthMacedonia | Pigmeat              | 2013 | kg | 10.35  |  |      |
| NorthMacedonia | PoultryMeat          | 2013 | kg | 18.77  |  |      |
| Timor-Leste    | AquaticAnimalsOthers | 2013 | kg | 0      |  | 0    |
| Timor-Leste    | AquaticPlants        | 2013 | kg | 0      |  |      |
| Timor-Leste    | BovineMeat           | 2013 | kg | 1.7    |  |      |
| Timor-Leste    | ButterGhee           | 2013 | kg | 0.04   |  |      |
| Timor-Leste    | Cephalopods          | 2013 | kg | 0.03   |  |      |
| Timor-Leste    | Cheese               | 2013 | kg | 0.03   |  |      |
| Timor-Leste    | DemersalFish         | 2013 | kg | 0.13   |  |      |
| Timor-Leste    | Eggs                 | 2013 | kg | 1.64   |  |      |

CoronaAnimalProd\_FoodSupply\_10Sept\_2020.sas

|                   |                      |      |    |        |  |
|-------------------|----------------------|------|----|--------|--|
| Timor-Leste       | FreshwaterFish       | 2013 | kg | 0.07   |  |
| Timor-Leste       | Honey                | 2013 | kg | 0.41   |  |
| Timor-Leste       | MarineFishOther      | 2013 | kg | 3.28   |  |
| Timor-Leste       | Milkwhole            | 2013 | kg | 0.96   |  |
| Timor-Leste       | Pigmeat              | 2013 | kg | 11.78  |  |
| Timor-Leste       | PoultryMeat          | 2013 | kg | 5.66   |  |
| Togo              | AquaticAnimalsOthers | 2013 | kg | 0      |  |
| Togo              | BovineMeat           | 2013 | kg | 1.53   |  |
| Togo              | ButterGhee           | 2013 | kg | 0.01   |  |
| Togo              | Cephalopods          | 2013 | kg | 0      |  |
| Togo              | Cheese               | 2013 | kg | 0.03   |  |
| Togo              | Cream                | 2013 | kg | 0.02   |  |
| Togo              | DemersalFish         | 2013 | kg | 0.46   |  |
| Togo              | Eggs                 | 2013 | kg | 0.86   |  |
| Togo              | FreshwaterFish       | 2013 | kg | 1.31   |  |
| Togo              | Honey                | 2013 | kg | 0      |  |
| Togo              | MarineFishOther      | 2013 | kg | 7.4    |  |
| Togo              | Milkwhole            | 2013 | kg | 1.91   |  |
| Togo              | Pigmeat              | 2013 | kg | 1.57   |  |
| Togo              | PoultryMeat          | 2013 | kg | 6.63   |  |
| Togo              | whey                 | 2013 | kg | 0.49   |  |
| TrinidadandTobago | AquaticPlants        | 2013 | kg | 0      |  |
| TrinidadandTobago | BovineMeat           | 2013 | kg | 6.13   |  |
| TrinidadandTobago | ButterGhee           | 2013 | kg | 0.73   |  |
| TrinidadandTobago | Cephalopods          | 2013 | kg | 0.54   |  |
| TrinidadandTobago | Cheese               | 2013 | kg | 5.81   |  |
| TrinidadandTobago | Cream                | 2013 | kg | 0.13   |  |
| TrinidadandTobago | DemersalFish         | 2013 | kg | 2.02   |  |
| TrinidadandTobago | Eggs                 | 2013 | kg | 4.2    |  |
| TrinidadandTobago | FreshwaterFish       | 2013 | kg | 0.44   |  |
| TrinidadandTobago | Honey                | 2013 | kg | 0.01   |  |
| TrinidadandTobago | MarineFishOther      | 2013 | kg | 10.7   |  |
| TrinidadandTobago | Milkwhole            | 2013 | kg | 40.64  |  |
| TrinidadandTobago | Pigmeat              | 2013 | kg | 8.92   |  |
| TrinidadandTobago | PoultryMeat          | 2013 | kg | 58.27  |  |
| TrinidadandTobago | whey                 | 2013 | kg | 7      |  |
| Tunisia           | AquaticAnimalsOthers | 2013 | kg | 0      |  |
| Tunisia           | AquaticPlants        | 2013 | kg | 0      |  |
| Tunisia           | BovineMeat           | 2013 | kg | 5.53   |  |
| Tunisia           | ButterGhee           | 2013 | kg | 0.64   |  |
| Tunisia           | Cephalopods          | 2013 | kg | 0.51   |  |
| Tunisia           | Cheese               | 2013 | kg | 0.88   |  |
| Tunisia           | Cream                | 2013 | kg | 0.95   |  |
| Tunisia           | DemersalFish         | 2013 | kg | 3.66   |  |
| Tunisia           | Eggs                 | 2013 | kg | 7.67   |  |
| Tunisia           | FreshwaterFish       | 2013 | kg | 0.2    |  |
| Tunisia           | Honey                | 2013 | kg | 0.3    |  |
| Tunisia           | MarineFishOther      | 2013 | kg | 0.56   |  |
| Tunisia           | Milkwhole            | 2013 | kg | 73.17  |  |
| Tunisia           | Pigmeat              | 2013 | kg | 0      |  |
| Tunisia           | PoultryMeat          | 2013 | kg | 18.5   |  |
| Tunisia           | whey                 | 2013 | kg | 1.1    |  |
| Turkey            | AquaticAnimalsOthers | 2013 | kg | 0.01   |  |
| Turkey            | AquaticPlants        | 2013 | kg | 0      |  |
| Turkey            | BovineMeat           | 2013 | kg | 11.64  |  |
| Turkey            | ButterGhee           | 2013 | kg | 3.08   |  |
| Turkey            | Cephalopods          | 2013 | kg | 0.07   |  |
| Turkey            | Cheese               | 2013 | kg | 2.3    |  |
| Turkey            | Cream                | 2013 | kg | 0      |  |
| Turkey            | DemersalFish         | 2013 | kg | 1.04   |  |
| Turkey            | Eggs                 | 2013 | kg | 8.2    |  |
| Turkey            | FreshwaterFish       | 2013 | kg | 1.64   |  |
| Turkey            | Honey                | 2013 | kg | 1.22   |  |
| Turkey            | MarineFishOther      | 2013 | kg | 0      |  |
| Turkey            | Milkwhole            | 2013 | kg | 151.59 |  |
| Turkey            | Pigmeat              | 2013 | kg | 0.01   |  |
| Turkey            | PoultryMeat          | 2013 | kg | 18.78  |  |
| Turkmenistan      | AquaticAnimalsOthers | 2013 | kg | 0      |  |
| Turkmenistan      | AquaticPlants        | 2013 | kg | 0      |  |
| Turkmenistan      | BovineMeat           | 2013 | kg | 26.06  |  |
| Turkmenistan      | ButterGhee           | 2013 | kg | 0.69   |  |
| Turkmenistan      | Cephalopods          | 2013 | kg | 0      |  |
| Turkmenistan      | Cheese               | 2013 | kg | 0.57   |  |
| Turkmenistan      | DemersalFish         | 2013 | kg | 0.12   |  |
| Turkmenistan      | Eggs                 | 2013 | kg | 7.88   |  |
| Turkmenistan      | FreshwaterFish       | 2013 | kg | 2.89   |  |
| Turkmenistan      | Honey                | 2013 | kg | 0.15   |  |
| Turkmenistan      | MarineFishOther      | 2013 | kg | 0.05   |  |
| Turkmenistan      | Milkwhole            | 2013 | kg | 127.86 |  |
| Turkmenistan      | Pigmeat              | 2013 | kg | 1.45   |  |
| Turkmenistan      | PoultryMeat          | 2013 | kg | 3.81   |  |
| Uganda            | AquaticAnimalsOthers | 2013 | kg | 0      |  |
| Uganda            | AquaticPlants        | 2013 | kg | 0      |  |
| Uganda            | BovineMeat           | 2013 | kg | 5.15   |  |
| Uganda            | ButterGhee           | 2013 | kg | 0.01   |  |
| Uganda            | Cephalopods          | 2013 | kg | 0      |  |

CoronaAnimalProd\_FoodSupply\_10Sept\_2020.sas

|          |                      |      |    |        |  |       |
|----------|----------------------|------|----|--------|--|-------|
| Uganda   | Cheese               | 2013 | kg | 0      |  |       |
| Uganda   | Cream                | 2013 | kg | 0      |  |       |
| Uganda   | DemersalFish         | 2013 | kg | 0      |  | 0     |
| Uganda   | Eggs                 | 2013 | kg | 0.97   |  |       |
| Uganda   | FreshwaterFish       | 2013 | kg |        |  | 12.46 |
| Uganda   | Honey                | 2013 | kg | 0.02   |  |       |
| Uganda   | MarineFishOther      | 2013 | kg |        |  | 0.01  |
| Uganda   | Milkwhole            | 2013 | kg | 37.05  |  |       |
| Uganda   | Pigmeat              | 2013 | kg | 3.37   |  |       |
| Uganda   | PoultryMeat          | 2013 | kg |        |  | 1.51  |
| Ukraine  | AquaticAnimalsothers | 2013 | kg |        |  | 0.01  |
| Ukraine  | AquaticPlants        | 2013 | kg | 0      |  |       |
| Ukraine  | BovineMeat           | 2013 | kg | 8.96   |  |       |
| Ukraine  | ButterGhee           | 2013 | kg | 2.31   |  |       |
| Ukraine  | Cephalopods          | 2013 | kg | 0.01   |  |       |
| Ukraine  | Cheese               | 2013 | kg | 3.27   |  |       |
| Ukraine  | Cream                | 2013 | kg | 0.02   |  |       |
| Ukraine  | DemersalFish         | 2013 | kg |        |  | 1.94  |
| Ukraine  | Eggs                 | 2013 | kg | 18.01  |  |       |
| Ukraine  | FreshwaterFish       | 2013 | kg |        |  | 2.23  |
| Ukraine  | Honey                | 2013 | kg | 1.15   |  |       |
| Ukraine  | MarineFishOther      | 2013 | kg |        |  | 2.3   |
| Ukraine  | Milkwhole            | 2013 | kg | 119.46 |  |       |
| Ukraine  | Pigmeat              | 2013 | kg | 20.56  |  |       |
| Ukraine  | PoultryMeat          | 2013 | kg |        |  | 24.23 |
| Ukraine  | whey                 | 2013 | kg | 0.34   |  |       |
| UAE      | AquaticAnimalsothers | 2013 | kg |        |  | 0.01  |
| UAE      | AquaticPlants        | 2013 | kg | 0      |  |       |
| UAE      | BovineMeat           | 2013 | kg | 5.64   |  |       |
| UAE      | ButterGhee           | 2013 | kg | 1.62   |  |       |
| UAE      | Cephalopods          | 2013 | kg | 0.21   |  |       |
| UAE      | Cheese               | 2013 | kg | 3.58   |  |       |
| UAE      | Cream                | 2013 | kg | 0.61   |  |       |
| UAE      | DemersalFish         | 2013 | kg |        |  | 13.12 |
| UAE      | Eggs                 | 2013 | kg | 8.23   |  |       |
| UAE      | FreshwaterFish       | 2013 | kg |        |  | 0.79  |
| UAE      | Honey                | 2013 | kg | 0.25   |  |       |
| UAE      | MarineFishOther      | 2013 | kg |        |  | 1.55  |
| UAE      | Milkwhole            | 2013 | kg | 77.32  |  |       |
| UAE      | PoultryMeat          | 2013 | kg | 41.04  |  |       |
| UK       | AquaticAnimalsothers | 2013 | kg |        |  | 0.01  |
| UK       | AquaticPlants        | 2013 | kg | 0      |  |       |
| UK       | BovineMeat           | 2013 | kg | 18.12  |  |       |
| UK       | ButterGhee           | 2013 | kg | 3.28   |  |       |
| UK       | Cephalopods          | 2013 | kg | 0.2    |  |       |
| UK       | Cheese               | 2013 | kg | 11.33  |  |       |
| UK       | Cream                | 2013 | kg | 0.27   |  |       |
| UK       | DemersalFish         | 2013 | kg |        |  | 8.92  |
| UK       | Eggs                 | 2013 | kg | 11.08  |  |       |
| UK       | FreshwaterFish       | 2013 | kg |        |  | 3.07  |
| UK       | Honey                | 2013 | kg | 0.66   |  |       |
| UK       | MarineFishOther      | 2013 | kg |        |  | 0.07  |
| UK       | Milkwhole            | 2013 | kg | 113.37 |  |       |
| UK       | Pigmeat              | 2013 | kg | 25.79  |  |       |
| UK       | PoultryMeat          | 2013 | kg | 31.55  |  |       |
| Tanzania | AquaticAnimalsothers | 2013 | kg |        |  | 0     |
| Tanzania | AquaticPlants        | 2013 | kg | 0      |  |       |
| Tanzania | BovineMeat           | 2013 | kg | 6.09   |  |       |
| Tanzania | ButterGhee           | 2013 | kg | 0.64   |  |       |
| Tanzania | Cephalopods          | 2013 | kg |        |  | 0.01  |
| Tanzania | Cheese               | 2013 | kg | 0.27   |  |       |
| Tanzania | Cream                | 2013 | kg | 0      |  |       |
| Tanzania | DemersalFish         | 2013 | kg |        |  | 0.53  |
| Tanzania | Eggs                 | 2013 | kg | 0.58   |  |       |
| Tanzania | FreshwaterFish       | 2013 | kg |        |  | 4.71  |
| Tanzania | Honey                | 2013 | kg | 0.61   |  |       |
| Tanzania | MarineFishOther      | 2013 | kg |        |  | 0.08  |
| Tanzania | Milkwhole            | 2013 | kg | 23.51  |  |       |
| Tanzania | Pigmeat              | 2013 | kg | 0.32   |  |       |
| Tanzania | PoultryMeat          | 2013 | kg |        |  | 1.84  |
| Tanzania | whey                 | 2013 | kg | 0.02   |  |       |
| USA      | AquaticAnimalsothers | 2013 | kg |        |  | 0.04  |
| USA      | AquaticPlants        | 2013 | kg | 0      |  |       |
| USA      | BovineMeat           | 2013 | kg | 36.24  |  |       |
| USA      | ButterGhee           | 2013 | kg | 2.13   |  |       |
| USA      | Cephalopods          | 2013 | kg | 0.35   |  |       |
| USA      | Cheese               | 2013 | kg | 15.77  |  |       |
| USA      | Cream                | 2013 | kg | 0.06   |  |       |
| USA      | DemersalFish         | 2013 | kg |        |  | 4.22  |
| USA      | Eggs                 | 2013 | kg | 14.58  |  |       |
| USA      | FreshwaterFish       | 2013 | kg |        |  | 5.23  |
| USA      | Honey                | 2013 | kg | 0.67   |  |       |
| USA      | MarineFishOther      | 2013 | kg |        |  | 0.01  |
| USA      | Milkwhole            | 2013 | kg | 104.15 |  |       |
| USA      | Pigmeat              | 2013 | kg | 27.64  |  |       |
| USA      | PoultryMeat          | 2013 | kg |        |  | 50.01 |

|            |                 |      |    |        |      |  |  |
|------------|-----------------|------|----|--------|------|--|--|
| USA        | whey            | 2013 | kg | 0.41   |      |  |  |
| Uruguay    | AquaticAnimals  | 2013 | kg |        | 0    |  |  |
| Uruguay    | AquaticPlants   | 2013 | kg |        | 0    |  |  |
| Uruguay    | BovineMeat      | 2013 | kg | 29.1   |      |  |  |
| Uruguay    | ButterGhee      | 2013 | kg | 1.33   |      |  |  |
| Uruguay    | Cephalopods     | 2013 | kg | 0.2    |      |  |  |
| Uruguay    | Cheese          | 2013 | kg | 10.53  |      |  |  |
| Uruguay    | Cream           | 2013 | kg | 0.15   |      |  |  |
| Uruguay    | DemersalFish    | 2013 | kg | 2.45   |      |  |  |
| Uruguay    | Eggs            | 2013 | kg | 13.14  |      |  |  |
| Uruguay    | FreshwaterFish  | 2013 | kg | 1.46   |      |  |  |
| Uruguay    | Honey           | 2013 | kg | 1.07   |      |  |  |
| Uruguay    | MarineFishOther | 2013 | kg | 0.18   |      |  |  |
| Uruguay    | Milkwhole       | 2013 | kg | 115.25 |      |  |  |
| Uruguay    | Pigmeat         | 2013 | kg | 16.84  |      |  |  |
| Uruguay    | PoultryMeat     | 2013 | kg | 27.45  |      |  |  |
| Uruguay    | whey            | 2013 | kg | 3.11   |      |  |  |
| Uzbekistan | AquaticAnimals  | 2013 | kg |        | 0    |  |  |
| Uzbekistan | AquaticPlants   | 2013 | kg |        | 0    |  |  |
| Uzbekistan | BovineMeat      | 2013 | kg | 28.2   |      |  |  |
| Uzbekistan | ButterGhee      | 2013 | kg | 0.29   |      |  |  |
| Uzbekistan | Cephalopods     | 2013 | kg | 0      |      |  |  |
| Uzbekistan | Cheese          | 2013 | kg | 0.79   |      |  |  |
| Uzbekistan | Cream           | 2013 | kg | 0      |      |  |  |
| Uzbekistan | DemersalFish    | 2013 | kg | 0.02   |      |  |  |
| Uzbekistan | Eggs            | 2013 | kg | 5.23   |      |  |  |
| Uzbekistan | FreshwaterFish  | 2013 | kg | 0.44   |      |  |  |
| Uzbekistan | Honey           | 2013 | kg | 0.25   |      |  |  |
| Uzbekistan | MarineFishOther | 2013 | kg | 0.04   |      |  |  |
| Uzbekistan | Milkwhole       | 2013 | kg | 124.79 |      |  |  |
| Uzbekistan | Pigmeat         | 2013 | kg | 1.03   |      |  |  |
| Uzbekistan | PoultryMeat     | 2013 | kg | 1.87   |      |  |  |
| Vanuatu    | AquaticAnimals  | 2013 | kg |        | 0    |  |  |
| Vanuatu    | AquaticPlants   | 2013 | kg |        | 0    |  |  |
| Vanuatu    | BovineMeat      | 2013 | kg | 11.22  |      |  |  |
| Vanuatu    | ButterGhee      | 2013 | kg | 0.03   |      |  |  |
| Vanuatu    | Cephalopods     | 2013 | kg | 0.14   |      |  |  |
| Vanuatu    | Cheese          | 2013 | kg | 0.18   |      |  |  |
| Vanuatu    | Cream           | 2013 | kg | 0.19   |      |  |  |
| Vanuatu    | DemersalFish    | 2013 | kg | 0.31   |      |  |  |
| Vanuatu    | Eggs            | 2013 | kg | 3.36   |      |  |  |
| Vanuatu    | FreshwaterFish  | 2013 | kg | 0.37   |      |  |  |
| Vanuatu    | Honey           | 2013 | kg | 0.01   |      |  |  |
| Vanuatu    | MarineFishOther | 2013 | kg | 13.43  |      |  |  |
| Vanuatu    | Milkwhole       | 2013 | kg | 22.84  |      |  |  |
| Vanuatu    | Pigmeat         | 2013 | kg | 15.14  |      |  |  |
| Vanuatu    | PoultryMeat     | 2013 | kg | 11.75  |      |  |  |
| Venezuela  | AquaticAnimals  | 2013 | kg |        | 0    |  |  |
| Venezuela  | AquaticPlants   | 2013 | kg |        | 0    |  |  |
| Venezuela  | BovineMeat      | 2013 | kg | 25.89  |      |  |  |
| Venezuela  | ButterGhee      | 2013 | kg | 0.14   |      |  |  |
| Venezuela  | Cephalopods     | 2013 | kg | 0.24   |      |  |  |
| Venezuela  | Cheese          | 2013 | kg | 7.79   |      |  |  |
| Venezuela  | Cream           | 2013 | kg | 0.13   |      |  |  |
| Venezuela  | DemersalFish    | 2013 | kg | 2.15   |      |  |  |
| Venezuela  | Eggs            | 2013 | kg | 5.63   |      |  |  |
| Venezuela  | FreshwaterFish  | 2013 | kg | 1.56   |      |  |  |
| Venezuela  | Honey           | 2013 | kg | 0.02   |      |  |  |
| Venezuela  | MarineFishOther | 2013 | kg | 0.18   |      |  |  |
| Venezuela  | Milkwhole       | 2013 | kg | 48.26  |      |  |  |
| Venezuela  | Pigmeat         | 2013 | kg | 7.23   |      |  |  |
| Venezuela  | PoultryMeat     | 2013 | kg | 39.28  |      |  |  |
| Vietnam    | AquaticAnimals  | 2013 | kg |        | 0.33 |  |  |
| Vietnam    | AquaticPlants   | 2013 | kg |        | 0    |  |  |
| Vietnam    | BovineMeat      | 2013 | kg | 7.44   |      |  |  |
| Vietnam    | ButterGhee      | 2013 | kg | 0.22   |      |  |  |
| Vietnam    | Cephalopods     | 2013 | kg | 1.52   |      |  |  |
| Vietnam    | Cheese          | 2013 | kg | 0.04   |      |  |  |
| Vietnam    | Cream           | 2013 | kg | 0.01   |      |  |  |
| Vietnam    | DemersalFish    | 2013 | kg | 0.07   |      |  |  |
| Vietnam    | Eggs            | 2013 | kg | 3.84   |      |  |  |
| Vietnam    | FreshwaterFish  | 2013 | kg | 12.95  |      |  |  |
| Vietnam    | Honey           | 2013 | kg | 0      |      |  |  |
| Vietnam    | MarineFishOther | 2013 | kg | 12.53  |      |  |  |
| Vietnam    | Milkwhole       | 2013 | kg | 8.37   |      |  |  |
| Vietnam    | Pigmeat         | 2013 | kg | 35     |      |  |  |
| Vietnam    | PoultryMeat     | 2013 | kg | 12.36  |      |  |  |
| Vietnam    | whey            | 2013 | kg | 5.93   |      |  |  |
| Yemen      | AquaticAnimals  | 2013 | kg |        | 0    |  |  |
| Yemen      | AquaticPlants   | 2013 | kg |        | 0    |  |  |
| Yemen      | BovineMeat      | 2013 | kg | 4.75   |      |  |  |
| Yemen      | ButterGhee      | 2013 | kg | 0.13   |      |  |  |
| Yemen      | Cephalopods     | 2013 | kg | 0      |      |  |  |
| Yemen      | Cheese          | 2013 | kg | 1.95   |      |  |  |
| Yemen      | Cream           | 2013 | kg | 0.03   |      |  |  |
| Yemen      | DemersalFish    | 2013 | kg | 1.1    |      |  |  |

```

Yemen Eggs 2013 kg 2.23
Yemen FreshwaterFish 2013 kg 0.04
Yemen Honey 2013 kg 0.1
Yemen Milkwhole 2013 kg kg 9.95
Yemen Pigmeat 2013 kg 0.01
Yemen PoultryMeat 2013 kg 10.72
Zambia AquaticPlants 2013 kg kg 0
Zambia BovineMeat 2013 kg 4.76
Zambia ButterGhee 2013 kg 0.02
Zambia Cephalopods 2013 kg 0
Zambia Cheese 2013 kg 0.12
Zambia Cream 2013 kg 0
Zambia DemersalFish 2013 kg kg 0
Zambia Eggs 2013 kg 3.32
Zambia FreshwaterFish 2013 kg 5.49
Zambia Honey 2013 kg 0.03
Zambia MarineFishOther 2013 kg 0.57
Zambia Milkwhole 2013 kg kg 6.99
Zambia Pigmeat 2013 kg 1.66
Zambia PoultryMeat 2013 kg kg 3.29
Zambia whey 2013 kg 0.31
Zimbabwe AquaticPlants 2013 kg kg 0
Zimbabwe BovineMeat 2013 kg 7.37
Zimbabwe ButterGhee 2013 kg 0.17
Zimbabwe Cephalopods 2013 kg 0
Zimbabwe Cheese 2013 kg 0.21
Zimbabwe Cream 2013 kg 0.07
Zimbabwe DemersalFish 2013 kg kg 0.01
Zimbabwe Eggs 2013 kg 1.75
Zimbabwe FreshwaterFish 2013 kg 2.05
Zimbabwe Honey 2013 kg 0
Zimbabwe MarineFishOther 2013 kg kg 0.12
Zimbabwe Milkwhole 2013 kg kg 26.13
Zimbabwe Pigmeat 2013 kg 2.65
Zimbabwe PoultryMeat 2013 kg kg 4.97
Zimbabwe whey 2013 kg 0.28
;
run;

```

/\*\*\*\*\* CROP \*\*\*\*\*/

```

data crop;
input country $ element $ quantity;
cards;
Afghanistan BeveragesAlcoholic 0
Afghanistan Maizeandproducts 2.5
Afghanistan Potatoesandproducts 7.53
Afghanistan RiceMilledEquivalent 13.82
Afghanistan wheatandproducts 160.23
Afghanistan wine 0
Albania BeveragesAlcoholic 2.65
Albania Maizeandproducts 1.79
Albania Potatoesandproducts 41.26
Albania RiceMilledEquivalent 7.78
Albania wheatandproducts 138.64
Albania wine 7.97
Algeria BeveragesAlcoholic 0.18
Algeria Maizeandproducts 15.99
Algeria Potatoesandproducts 64.78
Algeria RiceMilledEquivalent 2.97
Algeria wheatandproducts 185.42
Algeria wine 0.01
Angola BeveragesAlcoholic 1.94
Angola Maizeandproducts 38.8
Angola Potatoesandproducts 20.39
Angola RiceMilledEquivalent 8.12
Angola wheatandproducts 40.72
Angola wine 4.67
AntiguaandBarbuda BeveragesAlcoholic 5.33
AntiguaandBarbuda Maizeandproducts 2.44
AntiguaandBarbuda Potatoesandproducts 15.63
AntiguaandBarbuda RiceMilledEquivalent 9.46
AntiguaandBarbuda wheatandproducts 62.06
AntiguaandBarbuda wine 9.49
Argentina BeveragesAlcoholic 1.81
Argentina Maizeandproducts 10.44
Argentina Potatoesandproducts 32.85
Argentina RiceMilledEquivalent 8.77
Argentina wheatandproducts 103.11
Argentina wine 25.04
Armenia BeveragesAlcoholic 0.17
Armenia Maizeandproducts 0.03

```

|            |                      |        |
|------------|----------------------|--------|
| Armenia    | Potatoesandproducts  | 45.1   |
| Armenia    | RiceMilledEquivalent | 3.18   |
| Armenia    | Wheatandproducts     | 130.6  |
| Armenia    | Wine                 | 1.48   |
| Australia  | BeveragesAlcoholic   | 1.16   |
| Australia  | Maizeandproducts     | 4.94   |
| Australia  | Potatoesandproducts  | 54.58  |
| Australia  | RiceMilledEquivalent | 11.03  |
| Australia  | wheatandproducts     | 70.46  |
| Australia  | Wine                 | 19.48  |
| Austria    | BeveragesAlcoholic   | 4.91   |
| Austria    | Maizeandproducts     | 12.33  |
| Austria    | Potatoesandproducts  | 58.34  |
| Austria    | RiceMilledEquivalent | 3.7    |
| Austria    | wheatandproducts     | 81.1   |
| Austria    | Wine                 | 31.71  |
| Azerbaijan | BeveragesAlcoholic   | 9.77   |
| Azerbaijan | Maizeandproducts     | 13.33  |
| Azerbaijan | Potatoesandproducts  | 73.85  |
| Azerbaijan | RiceMilledEquivalent | 2.04   |
| Azerbaijan | wheatandproducts     | 222.4  |
| Azerbaijan | wine                 | 0.23   |
| Bahamas    | BeveragesAlcoholic   | 11.4   |
| Bahamas    | Maizeandproducts     | 3.59   |
| Bahamas    | Potatoesandproducts  | 8.3    |
| Bahamas    | RiceMilledEquivalent | 23.97  |
| Bahamas    | wheatandproducts     | 39.98  |
| Bahamas    | Wine                 | 4.53   |
| Bangladesh | BeveragesAlcoholic   | 0.01   |
| Bangladesh | Maizeandproducts     | 0.8    |
| Bangladesh | Potatoesandproducts  | 46.4   |
| Bangladesh | RiceMilledEquivalent | 171.73 |
| Bangladesh | wheatandproducts     | 17.47  |
| Bangladesh | wine                 | 0      |
| Barbados   | BeveragesAlcoholic   | 2.34   |
| Barbados   | Maizeandproducts     | 11.9   |
| Barbados   | Potatoesandproducts  | 49.24  |
| Barbados   | RiceMilledEquivalent | 15.66  |
| Barbados   | wheatandproducts     | 65.71  |
| Barbados   | Wine                 | 8.45   |
| Belarus    | BeveragesAlcoholic   | 15.35  |
| Belarus    | Maizeandproducts     | 0.57   |
| Belarus    | Potatoesandproducts  | 183.16 |
| Belarus    | RiceMilledEquivalent | 3.17   |
| Belarus    | wheatandproducts     | 60.48  |
| Belarus    | Wine                 | 8.74   |
| Belgium    | BeveragesAlcoholic   | 1.71   |
| Belgium    | Maizeandproducts     | 2.22   |
| Belgium    | Potatoesandproducts  | 93.41  |
| Belgium    | RiceMilledEquivalent | 8.61   |
| Belgium    | wheatandproducts     | 111.91 |
| Belgium    | Wine                 | 27.49  |
| Belize     | BeveragesAlcoholic   | 6.03   |
| Belize     | Maizeandproducts     | 31.75  |
| Belize     | Potatoesandproducts  | 14.24  |
| Belize     | RiceMilledEquivalent | 28.42  |
| Belize     | wheatandproducts     | 54.06  |
| Belize     | wine                 | 2.21   |
| Benin      | BeveragesAlcoholic   | 0.29   |
| Benin      | Maizeandproducts     | 42.7   |
| Benin      | Potatoesandproducts  | 0.1    |
| Benin      | RiceMilledEquivalent | 53.44  |
| Benin      | wheatandproducts     | 13.06  |
| Benin      | Wine                 | 0.42   |
| Bermuda    | BeveragesAlcoholic   | 3.94   |
| Bermuda    | Maizeandproducts     | 2.9    |
| Bermuda    | Potatoesandproducts  | 16.03  |
| Bermuda    | RiceMilledEquivalent | 5.38   |
| Bermuda    | wheatandproducts     | 54.88  |
| Bermuda    | Wine                 | 13.49  |
| Bolivia    | BeveragesAlcoholic   | 0.67   |
| Bolivia    | Maizeandproducts     | 38.86  |
| Bolivia    | Potatoesandproducts  | 64.66  |
| Bolivia    | RiceMilledEquivalent | 26.99  |
| Bolivia    | wheatandproducts     | 49.99  |
| Bolivia    | Wine                 | 0.87   |
| BosniaH    | BeveragesAlcoholic   | 18.77  |
| BosniaH    | Maizeandproducts     | 77.32  |
| BosniaH    | Potatoesandproducts  | 76.12  |
| BosniaH    | RiceMilledEquivalent | 1.88   |
| BosniaH    | wheatandproducts     | 93.56  |
| BosniaH    | Wine                 | 1.88   |
| Botswana   | BeveragesAlcoholic   | 0.71   |
| Botswana   | Maizeandproducts     | 38.45  |
| Botswana   | Potatoesandproducts  | 12.88  |
| Botswana   | RiceMilledEquivalent | 7.06   |



|                        |                      |        |  |
|------------------------|----------------------|--------|--|
| Botswana               | Wheatandproducts     | 38.2   |  |
| Botswana               | Wine                 | 2.52   |  |
| Brazil                 | BeveragesAlcoholic   | 3.59   |  |
| Brazil                 | Maizeandproducts     | 28.01  |  |
| Brazil                 | Potatoesandproducts  | 17.9   |  |
| Brazil                 | RiceMilledEquivalent | 32.13  |  |
| Brazil                 | wheatandproducts     | 53     |  |
| Brazil                 | Wine                 | 1.59   |  |
| Brunei                 | BeveragesAlcoholic   | 0.02   |  |
| Brunei                 | Maizeandproducts     | 12.77  |  |
| Brunei                 | Potatoesandproducts  | 12.14  |  |
| Brunei                 | RiceMilledEquivalent | 76.67  |  |
| Brunei                 | wheatandproducts     | 42.94  |  |
| Brunei                 | Wine                 | 0.06   |  |
| Bulgaria               | BeveragesAlcoholic   | 8.31   |  |
| Bulgaria               | Maizeandproducts     | 26.82  |  |
| Bulgaria               | Potatoesandproducts  | 27.5   |  |
| Bulgaria               | RiceMilledEquivalent | 2.24   |  |
| Bulgaria               | wheatandproducts     | 121.17 |  |
| Bulgaria               | Wine                 | 11.58  |  |
| BurkinaFaso            | BeveragesAlcoholic   | 0.33   |  |
| BurkinaFaso            | Maizeandproducts     | 68.51  |  |
| BurkinaFaso            | Potatoesandproducts  | 0.27   |  |
| BurkinaFaso            | RiceMilledEquivalent | 21.43  |  |
| BurkinaFaso            | wheatandproducts     | 11.1   |  |
| BurkinaFaso            | wine                 | 0.19   |  |
| CaboVerde              | BeveragesAlcoholic   | 0.84   |  |
| CaboVerde              | Maizeandproducts     | 38.83  |  |
| CaboVerde              | Potatoesandproducts  | 31.34  |  |
| CaboVerde              | RiceMilledEquivalent | 48.75  |  |
| CaboVerde              | wheatandproducts     | 38.64  |  |
| CaboVerde              | Wine                 | 7.14   |  |
| Cambodia               | BeveragesAlcoholic   | 1.65   |  |
| Cambodia               | Maizeandproducts     | 12.48  |  |
| Cambodia               | Potatoesandproducts  | 0.05   |  |
| Cambodia               | RiceMilledEquivalent | 159.1  |  |
| Cambodia               | wheatandproducts     | 2.74   |  |
| Cambodia               | Wine                 | 0.1    |  |
| Cameroon               | BeveragesAlcoholic   | 0.01   |  |
| Cameroon               | Maizeandproducts     | 42.01  |  |
| Cameroon               | Potatoesandproducts  | 6.4    |  |
| Cameroon               | RiceMilledEquivalent | 23.85  |  |
| Cameroon               | wheatandproducts     | 22.6   |  |
| Cameroon               | Wine                 | 0.47   |  |
| Canada                 | BeveragesAlcoholic   | 0.06   |  |
| Canada                 | Maizeandproducts     | 18.95  |  |
| Canada                 | Potatoesandproducts  | 71.07  |  |
| Canada                 | RiceMilledEquivalent | 12.65  |  |
| Canada                 | wheatandproducts     | 84.96  |  |
| Canada                 | wine                 | 11.45  |  |
| CentralAfricanRepublic | BeveragesAlcoholic   | 0.02   |  |
| CentralAfricanRepublic | Maizeandproducts     | 27.4   |  |
| CentralAfricanRepublic | Potatoesandproducts  | 0.13   |  |
| CentralAfricanRepublic | RiceMilledEquivalent | 7.39   |  |
| CentralAfricanRepublic | wheatandproducts     | 5.62   |  |
| CentralAfricanRepublic | wine                 | 0.04   |  |
| Chad                   | BeveragesAlcoholic   | 0.05   |  |
| Chad                   | Maizeandproducts     | 16.47  |  |
| Chad                   | Potatoesandproducts  | 3.26   |  |
| Chad                   | RiceMilledEquivalent | 10.81  |  |
| Chad                   | wheatandproducts     | 9.27   |  |
| Chad                   | Wine                 | 0.17   |  |
| Chile                  | BeveragesAlcoholic   | 2.49   |  |
| Chile                  | Maizeandproducts     | 21.04  |  |
| Chile                  | Potatoesandproducts  | 61.82  |  |
| Chile                  | RiceMilledEquivalent | 8.85   |  |
| Chile                  | wheatandproducts     | 104.74 |  |
| Chile                  | wine                 | 17.04  |  |
| HongKong               | BeveragesAlcoholic   | 1.94   |  |
| HongKong               | Maizeandproducts     | 4.47   |  |
| HongKong               | Potatoesandproducts  | 24.71  |  |
| HongKong               | RiceMilledEquivalent | 43.48  |  |
| HongKong               | wheatandproducts     | 53.14  |  |
| HongKong               | Wine                 | 4.24   |  |
| ChinaMacaoSAR          | BeveragesAlcoholic   | 5.12   |  |
| ChinaMacaoSAR          | Maizeandproducts     | 0.42   |  |
| ChinaMacaoSAR          | Potatoesandproducts  | 14.25  |  |
| ChinaMacaoSAR          | RiceMilledEquivalent | 36.5   |  |
| ChinaMacaoSAR          | wheatandproducts     | 56.41  |  |
| ChinaMacaoSAR          | wine                 | 11.6   |  |
| China                  | BeveragesAlcoholic   | 5.04   |  |
| China                  | Maizeandproducts     | 6.78   |  |
| China                  | Potatoesandproducts  | 41.42  |  |
| China                  | RiceMilledEquivalent | 78.18  |  |
| China                  | wheatandproducts     | 63.36  |  |
| China                  | wine                 | 1.5    |  |

|                       |                      |        |
|-----------------------|----------------------|--------|
| ChinaTaiwanProvinceof | BeveragesAlcoholic   | 4.74   |
| ChinaTaiwanProvinceof | Maizeandproducts     | 8.36   |
| ChinaTaiwanProvinceof | Potatoesandproducts  | 6.94   |
| ChinaTaiwanProvinceof | RiceMilledEquivalent | 45.85  |
| ChinaTaiwanProvinceof | wheatandproducts     | 50.92  |
| ChinaTaiwanProvinceof | wine                 | 0.71   |
| Colombia              | BeveragesAlcoholic   | 2.27   |
| Colombia              | Maizeandproducts     | 30.15  |
| Colombia              | Potatoesandproducts  | 33.45  |
| Colombia              | RiceMilledEquivalent | 28.02  |
| Colombia              | wheatandproducts     | 29.79  |
| Colombia              | wine                 | 0.35   |
| Congo                 | BeveragesAlcoholic   | 0.76   |
| Congo                 | Maizeandproducts     | 3.65   |
| Congo                 | Potatoesandproducts  | 2.07   |
| Congo                 | RiceMilledEquivalent | 16.51  |
| Congo                 | wheatandproducts     | 40.07  |
| Congo                 | wine                 | 1.03   |
| CostaRica             | BeveragesAlcoholic   | 8.07   |
| CostaRica             | Maizeandproducts     | 10.77  |
| CostaRica             | Potatoesandproducts  | 15.41  |
| CostaRica             | RiceMilledEquivalent | 45.69  |
| CostaRica             | wheatandproducts     | 39.31  |
| CostaRica             | wine                 | 2.02   |
| IvoryCoa              | BeveragesAlcoholic   | 0.01   |
| IvoryCoa              | Maizeandproducts     | 21.99  |
| IvoryCoa              | Potatoesandproducts  | 0.38   |
| IvoryCoa              | RiceMilledEquivalent | 63.56  |
| IvoryCoa              | wheatandproducts     | 20.75  |
| IvoryCoa              | wine                 | 1.34   |
| Croatia               | BeveragesAlcoholic   | 3.34   |
| Croatia               | Maizeandproducts     | 9.86   |
| Croatia               | Potatoesandproducts  | 42.33  |
| Croatia               | RiceMilledEquivalent | 2.64   |
| Croatia               | wheatandproducts     | 106.59 |
| Croatia               | wine                 | 13.8   |
| Cuba                  | BeveragesAlcoholic   | 7.97   |
| Cuba                  | Maizeandproducts     | 28.2   |
| Cuba                  | Potatoesandproducts  | 9.47   |
| Cuba                  | RiceMilledEquivalent | 67.7   |
| Cuba                  | wheatandproducts     | 54.62  |
| Cuba                  | wine                 | 1.55   |
| Cyprus                | BeveragesAlcoholic   | 2.45   |
| Cyprus                | Maizeandproducts     | 3.3    |
| Cyprus                | Potatoesandproducts  | 29.93  |
| Cyprus                | RiceMilledEquivalent | 4.94   |
| Cyprus                | wheatandproducts     | 83.25  |
| Cyprus                | wine                 | 15.7   |
| Czechia               | BeveragesAlcoholic   | 5.76   |
| Czechia               | Maizeandproducts     | 0      |
| Czechia               | Potatoesandproducts  | 75.49  |
| Czechia               | RiceMilledEquivalent | 4.79   |
| Czechia               | wheatandproducts     | 92.67  |
| Czechia               | wine                 | 9.17   |
| NKorea                | BeveragesAlcoholic   | 6.39   |
| NKorea                | Maizeandproducts     | 45.81  |
| NKorea                | Potatoesandproducts  | 49.02  |
| NKorea                | RiceMilledEquivalent | 74.18  |
| NKorea                | wheatandproducts     | 21.37  |
| Denmark               | BeveragesAlcoholic   | 3.37   |
| Denmark               | Maizeandproducts     | 4.71   |
| Denmark               | Potatoesandproducts  | 62.56  |
| Denmark               | RiceMilledEquivalent | 4.96   |
| Denmark               | wheatandproducts     | 98     |
| Denmark               | wine                 | 28.26  |
| Djibouti              | BeveragesAlcoholic   | 1.3    |
| Djibouti              | Maizeandproducts     | 1.21   |
| Djibouti              | Potatoesandproducts  | 16.66  |
| Djibouti              | RiceMilledEquivalent | 43.46  |
| Djibouti              | wheatandproducts     | 119    |
| Djibouti              | wine                 | 0.96   |
| Dominica              | BeveragesAlcoholic   | 9.38   |
| Dominica              | Maizeandproducts     | 5.8    |
| Dominica              | Potatoesandproducts  | 13.28  |
| Dominica              | RiceMilledEquivalent | 8.4    |
| Dominica              | wheatandproducts     | 71.28  |
| Dominica              | wine                 | 2.32   |
| Dominr                | BeveragesAlcoholic   | 4.01   |
| Dominr                | Maizeandproducts     | 3.67   |
| Dominr                | Potatoesandproducts  | 6.09   |
| Dominr                | RiceMilledEquivalent | 52.49  |
| Dominr                | wheatandproducts     | 30.27  |
| Dominr                | wine                 | 1.2    |
| Ecuador               | BeveragesAlcoholic   | 0.64   |
| Ecuador               | Maizeandproducts     | 8.3    |
| Ecuador               | Potatoesandproducts  | 19.33  |

|                 |                      |        |  |
|-----------------|----------------------|--------|--|
| Ecuador         | RiceMilledEquivalent | 45.07  |  |
| Ecuador         | wheatandproducts     | 39.19  |  |
| Ecuador         | wine                 | 0.32   |  |
| Egypt           | BeveragesAlcoholic   | 0.05   |  |
| Egypt           | Maizeandproducts     | 62.42  |  |
| Egypt           | Potatoesandproducts  | 36.46  |  |
| Egypt           | RiceMilledEquivalent | 39.77  |  |
| Egypt           | wheatandproducts     | 146.83 |  |
| Egypt           | wine                 | 0.05   |  |
| ElSalvador      | BeveragesAlcoholic   | 3.09   |  |
| ElSalvador      | Maizeandproducts     | 70.09  |  |
| ElSalvador      | Potatoesandproducts  | 14.28  |  |
| ElSalvador      | RiceMilledEquivalent | 10.53  |  |
| ElSalvador      | wheatandproducts     | 28.19  |  |
| ElSalvador      | wine                 | 0.34   |  |
| Estonia         | BeveragesAlcoholic   | 26.9   |  |
| Estonia         | Maizeandproducts     | 5.37   |  |
| Estonia         | Potatoesandproducts  | 88.45  |  |
| Estonia         | RiceMilledEquivalent | 2.56   |  |
| Estonia         | wheatandproducts     | 89.36  |  |
| Estonia         | wine                 | 15.59  |  |
| Ethiopia        | BeveragesAlcoholic   | 0.17   |  |
| Ethiopia        | Maizeandproducts     | 42.08  |  |
| Ethiopia        | Potatoesandproducts  | 6.65   |  |
| Ethiopia        | RiceMilledEquivalent | 2.25   |  |
| Ethiopia        | wheatandproducts     | 31.26  |  |
| Ethiopia        | wine                 | 0.02   |  |
| Fiji            | BeveragesAlcoholic   | 1.08   |  |
| Fiji            | Maizeandproducts     | 0.33   |  |
| Fiji            | Potatoesandproducts  | 28.36  |  |
| Fiji            | RiceMilledEquivalent | 45.62  |  |
| Fiji            | wheatandproducts     | 84.22  |  |
| Fiji            | wine                 | 1.14   |  |
| Finland         | BeveragesAlcoholic   | 4.06   |  |
| Finland         | Potatoesandproducts  | 65.65  |  |
| Finland         | RiceMilledEquivalent | 4.42   |  |
| Finland         | wheatandproducts     | 81.99  |  |
| Finland         | wine                 | 11.79  |  |
| France          | BeveragesAlcoholic   | 2.26   |  |
| France          | Maizeandproducts     | 11.11  |  |
| France          | Potatoesandproducts  | 53.79  |  |
| France          | RiceMilledEquivalent | 4.88   |  |
| France          | wheatandproducts     | 108.43 |  |
| France          | wine                 | 37.78  |  |
| FrenchPolynesia | BeveragesAlcoholic   | 1.08   |  |
| FrenchPolynesia | Maizeandproducts     | 0      |  |
| FrenchPolynesia | Potatoesandproducts  | 34.42  |  |
| FrenchPolynesia | RiceMilledEquivalent | 35.59  |  |
| FrenchPolynesia | wheatandproducts     | 68.67  |  |
| FrenchPolynesia | wine                 | 9.48   |  |
| Gabon           | BeveragesAlcoholic   | 2.81   |  |
| Gabon           | Maizeandproducts     | 16     |  |
| Gabon           | Potatoesandproducts  | 3.87   |  |
| Gabon           | RiceMilledEquivalent | 37.07  |  |
| Gabon           | wheatandproducts     | 62.87  |  |
| Gabon           | wine                 | 4.33   |  |
| Gambia          | BeveragesAlcoholic   | 0.01   |  |
| Gambia          | Maizeandproducts     | 14.18  |  |
| Gambia          | Potatoesandproducts  | 1.62   |  |
| Gambia          | RiceMilledEquivalent | 61.84  |  |
| Gambia          | wheatandproducts     | 37.91  |  |
| Gambia          | wine                 | 0.12   |  |
| Georgia         | BeveragesAlcoholic   | 2.77   |  |
| Georgia         | Maizeandproducts     | 27.18  |  |
| Georgia         | Potatoesandproducts  | 56.1   |  |
| Georgia         | RiceMilledEquivalent | 2.64   |  |
| Georgia         | wheatandproducts     | 163.43 |  |
| Georgia         | wine                 | 14.73  |  |
| Germany         | BeveragesAlcoholic   | 10.61  |  |
| Germany         | Maizeandproducts     | 12.13  |  |
| Germany         | Potatoesandproducts  | 61.46  |  |
| Germany         | RiceMilledEquivalent | 3.34   |  |
| Germany         | wheatandproducts     | 83.41  |  |
| Germany         | wine                 | 22.91  |  |
| Ghana           | BeveragesAlcoholic   | 0.18   |  |
| Ghana           | Maizeandproducts     | 25.48  |  |
| Ghana           | Potatoesandproducts  | 0.24   |  |
| Ghana           | RiceMilledEquivalent | 32.03  |  |
| Ghana           | wheatandproducts     | 14.45  |  |
| Ghana           | wine                 | 0.39   |  |
| Greece          | BeveragesAlcoholic   | 2.27   |  |
| Greece          | Maizeandproducts     | 1.92   |  |
| Greece          | Potatoesandproducts  | 72.4   |  |
| Greece          | RiceMilledEquivalent | 6.64   |  |
| Greece          | wheatandproducts     | 124.04 |  |
| Greece          | wine                 | 18.69  |  |

|               |                      |        |
|---------------|----------------------|--------|
| Grenada       | BeveragesAlcoholic   | 8.53   |
| Grenada       | Maizeandproducts     | 4.96   |
| Grenada       | Potatoesandproducts  | 10.27  |
| Grenada       | RiceMilledEquivalent | 9.56   |
| Grenada       | wheatandproducts     | 59.59  |
| Grenada       | wine                 | 3.16   |
| Guatemala     | BeveragesAlcoholic   | 1.72   |
| Guatemala     | Maizeandproducts     | 87.25  |
| Guatemala     | Potatoesandproducts  | 10.79  |
| Guatemala     | RiceMilledEquivalent | 5.66   |
| Guatemala     | wheatandproducts     | 35.9   |
| Guatemala     | wine                 | 0.23   |
| Guinea        | BeveragesAlcoholic   | 0.03   |
| Guinea        | Maizeandproducts     | 8.87   |
| Guinea        | Potatoesandproducts  | 7.04   |
| Guinea        | RiceMilledEquivalent | 97.12  |
| Guinea        | wheatandproducts     | 18.55  |
| Guinea        | wine                 | 0.12   |
| Guinea-Bissau | BeveragesAlcoholic   | 0.73   |
| Guinea-Bissau | Maizeandproducts     | 3.88   |
| Guinea-Bissau | Potatoesandproducts  | 1.7    |
| Guinea-Bissau | RiceMilledEquivalent | 98.09  |
| Guinea-Bissau | wheatandproducts     | 11.33  |
| Guinea-Bissau | wine                 | 3.81   |
| Guyana        | BeveragesAlcoholic   | 3.48   |
| Guyana        | Maizeandproducts     | 2.05   |
| Guyana        | Potatoesandproducts  | 12.25  |
| Guyana        | RiceMilledEquivalent | 76.58  |
| Guyana        | wheatandproducts     | 59.66  |
| Guyana        | wine                 | 0.1    |
| Haiti         | BeveragesAlcoholic   | 8.75   |
| Haiti         | Maizeandproducts     | 23.14  |
| Haiti         | Potatoesandproducts  | 3.69   |
| Haiti         | RiceMilledEquivalent | 42.75  |
| Haiti         | wheatandproducts     | 16.11  |
| Haiti         | wine                 | 0.08   |
| Honduras      | BeveragesAlcoholic   | 3.25   |
| Honduras      | Maizeandproducts     | 77.96  |
| Honduras      | Potatoesandproducts  | 5.46   |
| Honduras      | RiceMilledEquivalent | 14.42  |
| Honduras      | wheatandproducts     | 37.36  |
| Honduras      | wine                 | 0.24   |
| Hungary       | BeveragesAlcoholic   | 6.33   |
| Hungary       | Maizeandproducts     | 0.25   |
| Hungary       | Potatoesandproducts  | 46.43  |
| Hungary       | RiceMilledEquivalent | 2.15   |
| Hungary       | wheatandproducts     | 109.98 |
| Hungary       | wine                 | 23.97  |
| Iceland       | BeveragesAlcoholic   | 1.36   |
| Iceland       | Potatoesandproducts  | 32.08  |
| Iceland       | RiceMilledEquivalent | 3.89   |
| Iceland       | wheatandproducts     | 72.92  |
| Iceland       | wine                 | 10.96  |
| India         | BeveragesAlcoholic   | 1.62   |
| India         | Maizeandproducts     | 6.29   |
| India         | Potatoesandproducts  | 24.4   |
| India         | RiceMilledEquivalent | 69.49  |
| India         | wheatandproducts     | 60.56  |
| India         | wine                 | 0      |
| Indonesia     | BeveragesAlcoholic   | 0.11   |
| Indonesia     | Maizeandproducts     | 35.3   |
| Indonesia     | Potatoesandproducts  | 4.22   |
| Indonesia     | RiceMilledEquivalent | 134.62 |
| Indonesia     | wheatandproducts     | 25.45  |
| Indonesia     | wine                 | 0      |
| Iran          | BeveragesAlcoholic   | 0      |
| Iran          | Maizeandproducts     | 2.37   |
| Iran          | Potatoesandproducts  | 50.64  |
| Iran          | RiceMilledEquivalent | 29.95  |
| Iran          | wheatandproducts     | 153.31 |
| Iran          | wine                 | 0      |
| Iraq          | BeveragesAlcoholic   | 0.4    |
| Iraq          | Maizeandproducts     | 0.3    |
| Iraq          | Potatoesandproducts  | 17.85  |
| Iraq          | RiceMilledEquivalent | 40.54  |
| Iraq          | wheatandproducts     | 136.47 |
| Iraq          | wine                 | 0.02   |
| Ireland       | BeveragesAlcoholic   | 8.64   |
| Ireland       | Maizeandproducts     | 9.19   |
| Ireland       | Potatoesandproducts  | 94.01  |
| Ireland       | RiceMilledEquivalent | 3      |
| Ireland       | wheatandproducts     | 107.98 |
| Ireland       | wine                 | 16.5   |
| Israel        | BeveragesAlcoholic   | 1.75   |
| Israel        | Maizeandproducts     | 14.75  |
| Israel        | Potatoesandproducts  | 39.9   |

|                               |                      |        |  |  |
|-------------------------------|----------------------|--------|--|--|
| Israel                        | RiceMilledEquivalent | 16.81  |  |  |
| Israel                        | wheatandproducts     | 110.86 |  |  |
| Israel                        | wine                 | 0.86   |  |  |
| Italy                         | BeveragesAlcoholic   | 0.82   |  |  |
| Italy                         | Maizeandproducts     | 4.23   |  |  |
| Italy                         | Potatoesandproducts  | 38.16  |  |  |
| Italy                         | RiceMilledEquivalent | 5.74   |  |  |
| Italy                         | wheatandproducts     | 146.37 |  |  |
| Italy                         | wine                 | 30.55  |  |  |
| Jamaica                       | BeveragesAlcoholic   | 3.09   |  |  |
| Jamaica                       | Maizeandproducts     | 7.06   |  |  |
| Jamaica                       | Potatoesandproducts  | 11.36  |  |  |
| Jamaica                       | RiceMilledEquivalent | 23.45  |  |  |
| Jamaica                       | wheatandproducts     | 70.67  |  |  |
| Jamaica                       | wine                 | 0.86   |  |  |
| Japan                         | BeveragesAlcoholic   | 8.99   |  |  |
| Japan                         | Maizeandproducts     | 9.21   |  |  |
| Japan                         | Potatoesandproducts  | 20.95  |  |  |
| Japan                         | RiceMilledEquivalent | 59.85  |  |  |
| Japan                         | wheatandproducts     | 45.04  |  |  |
| Japan                         | wine                 | 2.72   |  |  |
| Jordan                        | BeveragesAlcoholic   | 0.13   |  |  |
| Jordan                        | Maizeandproducts     | 2.68   |  |  |
| Jordan                        | Potatoesandproducts  | 20.79  |  |  |
| Jordan                        | RiceMilledEquivalent | 19.67  |  |  |
| Jordan                        | wheatandproducts     | 136.74 |  |  |
| Jordan                        | wine                 | 0.05   |  |  |
| Kazakhstan                    | BeveragesAlcoholic   | 6.37   |  |  |
| Kazakhstan                    | Maizeandproducts     | 0.82   |  |  |
| Kazakhstan                    | Potatoesandproducts  | 111.34 |  |  |
| Kazakhstan                    | RiceMilledEquivalent | 7.32   |  |  |
| Kazakhstan                    | wheatandproducts     | 92.31  |  |  |
| Kazakhstan                    | wine                 | 2.67   |  |  |
| Kenya                         | BeveragesAlcoholic   | 0.57   |  |  |
| Kenya                         | Maizeandproducts     | 76.2   |  |  |
| Kenya                         | Potatoesandproducts  | 41.66  |  |  |
| Kenya                         | RiceMilledEquivalent | 12.94  |  |  |
| Kenya                         | wheatandproducts     | 34.65  |  |  |
| Kenya                         | wine                 | 0.13   |  |  |
| Kiribati                      | BeveragesAlcoholic   | 0      |  |  |
| Kiribati                      | Maizeandproducts     | 0.31   |  |  |
| Kiribati                      | Potatoesandproducts  | 0.44   |  |  |
| Kiribati                      | RiceMilledEquivalent | 65.75  |  |  |
| Kiribati                      | wheatandproducts     | 48.64  |  |  |
| Kiribati                      | wine                 | 0.08   |  |  |
| Kuwait                        | BeveragesAlcoholic   | 0      |  |  |
| Kuwait                        | Maizeandproducts     | 5.99   |  |  |
| Kuwait                        | Potatoesandproducts  | 65.07  |  |  |
| Kuwait                        | RiceMilledEquivalent | 43.83  |  |  |
| Kuwait                        | wheatandproducts     | 96.76  |  |  |
| Kyrgyzstan                    | BeveragesAlcoholic   | 3.87   |  |  |
| Kyrgyzstan                    | Maizeandproducts     | 26.16  |  |  |
| Kyrgyzstan                    | Potatoesandproducts  | 99.27  |  |  |
| Kyrgyzstan                    | RiceMilledEquivalent | 7.31   |  |  |
| Kyrgyzstan                    | wheatandproducts     | 129.09 |  |  |
| Kyrgyzstan                    | wine                 | 0.61   |  |  |
| LaoPeople'sDemocraticRepublic | BeveragesAlcoholic   | 5.27   |  |  |
| LaoPeople'sDemocraticRepublic | Maizeandproducts     | 15.44  |  |  |
| LaoPeople'sDemocraticRepublic | Potatoesandproducts  | 3.39   |  |  |
| LaoPeople'sDemocraticRepublic | RiceMilledEquivalent | 159.11 |  |  |
| LaoPeople'sDemocraticRepublic | wheatandproducts     | 1.89   |  |  |
| LaoPeople'sDemocraticRepublic | wine                 | 0.33   |  |  |
| Latvia                        | BeveragesAlcoholic   | 8.97   |  |  |
| Latvia                        | Maizeandproducts     | 0.24   |  |  |
| Latvia                        | Potatoesandproducts  | 116.52 |  |  |
| Latvia                        | RiceMilledEquivalent | 2.21   |  |  |
| Latvia                        | wheatandproducts     | 72.13  |  |  |
| Latvia                        | wine                 | 3.25   |  |  |
| Lebanon                       | BeveragesAlcoholic   | 2.79   |  |  |
| Lebanon                       | Maizeandproducts     | 0.41   |  |  |
| Lebanon                       | Potatoesandproducts  | 44.03  |  |  |
| Lebanon                       | RiceMilledEquivalent | 10.84  |  |  |
| Lebanon                       | wheatandproducts     | 119.72 |  |  |
| Lebanon                       | wine                 | 2.7    |  |  |
| Lesotho                       | BeveragesAlcoholic   | 0.44   |  |  |
| Lesotho                       | Maizeandproducts     | 158.4  |  |  |
| Lesotho                       | Potatoesandproducts  | 56.52  |  |  |
| Lesotho                       | RiceMilledEquivalent | 3.73   |  |  |
| Lesotho                       | wheatandproducts     | 52.7   |  |  |
| Lesotho                       | wine                 | 0.42   |  |  |
| Liberia                       | BeveragesAlcoholic   | 3.46   |  |  |
| Liberia                       | Maizeandproducts     | 0.04   |  |  |
| Liberia                       | Potatoesandproducts  | 0.27   |  |  |
| Liberia                       | RiceMilledEquivalent | 94.75  |  |  |
| Liberia                       | wheatandproducts     | 10.95  |  |  |
| Liberia                       | wine                 | 0.08   |  |  |

|            |                      |        |
|------------|----------------------|--------|
| Lithuania  | BeveragesAlcoholic   | 15.21  |
| Lithuania  | Maizeandproducts     | 0.66   |
| Lithuania  | Potatoesandproducts  | 95.75  |
| Lithuania  | RiceMilledEquivalent | 3.07   |
| Lithuania  | wheatandproducts     | 121.59 |
| Lithuania  | wine                 | 13.21  |
| Luxembourg | BeveragesAlcoholic   | 11     |
| Luxembourg | Maizeandproducts     | 4.64   |
| Luxembourg | Potatoesandproducts  | 55.75  |
| Luxembourg | RiceMilledEquivalent | 4.2    |
| Luxembourg | wheatandproducts     | 103.2  |
| Luxembourg | wine                 | 51.41  |
| Madagascar | BeveragesAlcoholic   | 0.49   |
| Madagascar | Maizeandproducts     | 17.98  |
| Madagascar | Potatoesandproducts  | 5.64   |
| Madagascar | RiceMilledEquivalent | 102.53 |
| Madagascar | wheatandproducts     | 9.01   |
| Madagascar | wine                 | 0.39   |
| Malawi     | BeveragesAlcoholic   | 0.32   |
| Malawi     | Maizeandproducts     | 129.24 |
| Malawi     | Potatoesandproducts  | 131.69 |
| Malawi     | RiceMilledEquivalent | 4.75   |
| Malawi     | wheatandproducts     | 11.77  |
| Malawi     | wine                 | 0.01   |
| Malaysia   | BeveragesAlcoholic   | 0      |
| Malaysia   | Maizeandproducts     | 15.82  |
| Malaysia   | Potatoesandproducts  | 10.97  |
| Malaysia   | RiceMilledEquivalent | 81.25  |
| Malaysia   | wheatandproducts     | 51.04  |
| Malaysia   | wine                 | 0.13   |
| Maldives   | BeveragesAlcoholic   | 1.04   |
| Maldives   | Maizeandproducts     | 0.83   |
| Maldives   | Potatoesandproducts  | 15.55  |
| Maldives   | RiceMilledEquivalent | 50.73  |
| Maldives   | wheatandproducts     | 77.77  |
| Maldives   | wine                 | 1.83   |
| Mali       | BeveragesAlcoholic   | 0.03   |
| Mali       | Maizeandproducts     | 38.05  |
| Mali       | Potatoesandproducts  | 6.51   |
| Mali       | RiceMilledEquivalent | 56.99  |
| Mali       | wheatandproducts     | 12.48  |
| Mali       | wine                 | 0.03   |
| Malta      | BeveragesAlcoholic   | 4.72   |
| Malta      | Maizeandproducts     | 5.38   |
| Malta      | Potatoesandproducts  | 48.61  |
| Malta      | RiceMilledEquivalent | 4.96   |
| Malta      | wheatandproducts     | 139.58 |
| Malta      | wine                 | 15.37  |
| Mauritania | BeveragesAlcoholic   | 0.02   |
| Mauritania | Maizeandproducts     | 3.2    |
| Mauritania | Potatoesandproducts  | 6.89   |
| Mauritania | RiceMilledEquivalent | 48.43  |
| Mauritania | wheatandproducts     | 100.77 |
| Mauritania | wine                 | 0      |
| Mauritius  | BeveragesAlcoholic   | 1.57   |
| Mauritius  | Maizeandproducts     | 2.97   |
| Mauritius  | Potatoesandproducts  | 19.29  |
| Mauritius  | RiceMilledEquivalent | 45.56  |
| Mauritius  | wheatandproducts     | 114.02 |
| Mauritius  | wine                 | 1.54   |
| Mexico     | BeveragesAlcoholic   | 0.63   |
| Mexico     | Maizeandproducts     | 116.34 |
| Mexico     | Potatoesandproducts  | 14.86  |
| Mexico     | RiceMilledEquivalent | 5.64   |
| Mexico     | wheatandproducts     | 35.21  |
| Mexico     | wine                 | 0.09   |
| Mongolia   | BeveragesAlcoholic   | 4.58   |
| Mongolia   | Maizeandproducts     | 0.02   |
| Mongolia   | Potatoesandproducts  | 48.73  |
| Mongolia   | RiceMilledEquivalent | 7.68   |
| Mongolia   | wheatandproducts     | 124.64 |
| Mongolia   | wine                 | 0.77   |
| Montenegro | BeveragesAlcoholic   | 3.28   |
| Montenegro | Maizeandproducts     | 4.39   |
| Montenegro | Potatoesandproducts  | 119.31 |
| Montenegro | RiceMilledEquivalent | 2.24   |
| Montenegro | wheatandproducts     | 121.89 |
| Montenegro | wine                 | 20.77  |
| Morocco    | BeveragesAlcoholic   | 0.19   |
| Morocco    | Maizeandproducts     | 36.11  |
| Morocco    | Potatoesandproducts  | 48.56  |
| Morocco    | RiceMilledEquivalent | 1.1    |
| Morocco    | wheatandproducts     | 179.7  |
| Morocco    | wine                 | 0.98   |
| Mozambique | BeveragesAlcoholic   | 0.34   |
| Mozambique | Maizeandproducts     | 54.56  |

|              |                      |        |
|--------------|----------------------|--------|
| Mozambique   | Potatoesandproducts  | 8.04   |
| Mozambique   | RiceMilledEquivalent | 23.41  |
| Mozambique   | wheatandproducts     | 14.65  |
| Mozambique   | wine                 | 0.38   |
| Myanmar      | BeveragesAlcoholic   | 0.48   |
| Myanmar      | Maizeandproducts     | 3.87   |
| Myanmar      | Potatoesandproducts  | 9.98   |
| Myanmar      | RiceMilledEquivalent | 132.8  |
| Myanmar      | wheatandproducts     | 6.22   |
| Myanmar      | wine                 | 0.07   |
| Namibia      | BeveragesAlcoholic   | 1.77   |
| Namibia      | Maizeandproducts     | 43.41  |
| Namibia      | Potatoesandproducts  | 16.11  |
| Namibia      | RiceMilledEquivalent | 6.31   |
| Namibia      | wheatandproducts     | 36.26  |
| Namibia      | wine                 | 4.46   |
| Nepal        | BeveragesAlcoholic   | 0.19   |
| Nepal        | Maizeandproducts     | 43.41  |
| Nepal        | Potatoesandproducts  | 80.56  |
| Nepal        | RiceMilledEquivalent | 87.75  |
| Nepal        | wheatandproducts     | 50.46  |
| Nepal        | wine                 | 0.03   |
| Netherlands  | BeveragesAlcoholic   | 2.71   |
| Netherlands  | Maizeandproducts     | 2.47   |
| Netherlands  | Potatoesandproducts  | 90.83  |
| Netherlands  | RiceMilledEquivalent | 2.93   |
| Netherlands  | wheatandproducts     | 70.17  |
| Netherlands  | wine                 | 20.57  |
| NewCaledonia | BeveragesAlcoholic   | 3.78   |
| NewCaledonia | Maizeandproducts     | 0.7    |
| NewCaledonia | Potatoesandproducts  | 31.3   |
| NewCaledonia | RiceMilledEquivalent | 17.47  |
| NewCaledonia | wheatandproducts     | 81.75  |
| NewCaledonia | wine                 | 20.15  |
| NewZealand   | BeveragesAlcoholic   | 3.69   |
| NewZealand   | Maizeandproducts     | 4.43   |
| NewZealand   | Potatoesandproducts  | 53.93  |
| NewZealand   | RiceMilledEquivalent | 9.16   |
| NewZealand   | wheatandproducts     | 76.91  |
| NewZealand   | wine                 | 7.58   |
| Nicaragua    | BeveragesAlcoholic   | 2.72   |
| Nicaragua    | Maizeandproducts     | 68.53  |
| Nicaragua    | Potatoesandproducts  | 6.24   |
| Nicaragua    | RiceMilledEquivalent | 43.33  |
| Nicaragua    | wheatandproducts     | 28.17  |
| Nicaragua    | wine                 | 0.2    |
| Niger        | BeveragesAlcoholic   | 0.07   |
| Niger        | Maizeandproducts     | 3.76   |
| Niger        | Potatoesandproducts  | 4.43   |
| Niger        | RiceMilledEquivalent | 13.17  |
| Niger        | wheatandproducts     | 4.79   |
| Niger        | wine                 | 0.04   |
| Nigeria      | BeveragesAlcoholic   | 0.08   |
| Nigeria      | Maizeandproducts     | 32.72  |
| Nigeria      | Potatoesandproducts  | 4.63   |
| Nigeria      | RiceMilledEquivalent | 28.23  |
| Nigeria      | wheatandproducts     | 20.82  |
| Nigeria      | wine                 | 0.16   |
| Norway       | BeveragesAlcoholic   | 2.48   |
| Norway       | Maizeandproducts     | 0      |
| Norway       | Potatoesandproducts  | 52.87  |
| Norway       | RiceMilledEquivalent | 4.36   |
| Norway       | wheatandproducts     | 97.12  |
| Norway       | wine                 | 16.24  |
| Oman         | Maizeandproducts     | 12.55  |
| Oman         | Potatoesandproducts  | 26.78  |
| Oman         | RiceMilledEquivalent | 56.55  |
| Oman         | wheatandproducts     | 64.1   |
| Pakistan     | BeveragesAlcoholic   | 0      |
| Pakistan     | Maizeandproducts     | 14.54  |
| Pakistan     | Potatoesandproducts  | 15.33  |
| Pakistan     | RiceMilledEquivalent | 12.25  |
| Pakistan     | wheatandproducts     | 113.63 |
| Pakistan     | wine                 | 0      |
| Panama       | BeveragesAlcoholic   | 3.21   |
| Panama       | Maizeandproducts     | 25.56  |
| Panama       | Potatoesandproducts  | 13.98  |
| Panama       | RiceMilledEquivalent | 66.42  |
| Panama       | wheatandproducts     | 38.96  |
| Panama       | wine                 | 1.23   |
| Paraguay     | BeveragesAlcoholic   | 3.28   |
| Paraguay     | Maizeandproducts     | 59.32  |
| Paraguay     | Potatoesandproducts  | 2.9    |
| Paraguay     | RiceMilledEquivalent | 4.91   |
| Paraguay     | wheatandproducts     | 31.51  |
| Paraguay     | wine                 | 2.98   |

|                              |                      |        |  |
|------------------------------|----------------------|--------|--|
| Peru                         | BeveragesAlcoholic   | 2.92   |  |
| Peru                         | Maizeandproducts     | 19.41  |  |
| Peru                         | Potatoesandproducts  | 82.5   |  |
| Peru                         | RiceMilledEquivalent | 48.92  |  |
| Peru                         | wheatandproducts     | 56.12  |  |
| Peru                         | wine                 | 2.61   |  |
| Philippines                  | BeveragesAlcoholic   | 4.24   |  |
| Philippines                  | Maizeandproducts     | 20.11  |  |
| Philippines                  | Potatoesandproducts  | 2.24   |  |
| Philippines                  | RiceMilledEquivalent | 119.44 |  |
| Philippines                  | wheatandproducts     | 23.12  |  |
| Philippines                  | wine                 | 0.11   |  |
| Poland                       | BeveragesAlcoholic   | 4.45   |  |
| Poland                       | Potatoesandproducts  | 104    |  |
| Poland                       | RiceMilledEquivalent | 0.95   |  |
| Poland                       | wheatandproducts     | 108.83 |  |
| Poland                       | wine                 | 2.8    |  |
| Portugal                     | BeveragesAlcoholic   | 9.33   |  |
| Portugal                     | Maizeandproducts     | 17.59  |  |
| Portugal                     | Potatoesandproducts  | 69.58  |  |
| Portugal                     | RiceMilledEquivalent | 14.86  |  |
| Portugal                     | wheatandproducts     | 94.3   |  |
| Portugal                     | wine                 | 40.35  |  |
| S.Korea                      | BeveragesAlcoholic   | 5.13   |  |
| S.Korea                      | Maizeandproducts     | 12.46  |  |
| S.Korea                      | Potatoesandproducts  | 14.84  |  |
| S.Korea                      | RiceMilledEquivalent | 85.18  |  |
| S.Korea                      | wheatandproducts     | 50.84  |  |
| S.Korea                      | wine                 | 0.67   |  |
| Moldova                      | BeveragesAlcoholic   | 5.03   |  |
| Moldova                      | Maizeandproducts     | 91.77  |  |
| Moldova                      | Potatoesandproducts  | 53.99  |  |
| Moldova                      | RiceMilledEquivalent | 2.95   |  |
| Moldova                      | wheatandproducts     | 47.89  |  |
| Moldova                      | wine                 | 10.34  |  |
| Romania                      | BeveragesAlcoholic   | 1.38   |  |
| Romania                      | Maizeandproducts     | 40.47  |  |
| Romania                      | Potatoesandproducts  | 99.51  |  |
| Romania                      | RiceMilledEquivalent | 2.59   |  |
| Romania                      | wheatandproducts     | 134.87 |  |
| Romania                      | wine                 | 20.78  |  |
| Russia                       | BeveragesAlcoholic   | 7.73   |  |
| Russia                       | Maizeandproducts     | 0.41   |  |
| Russia                       | Potatoesandproducts  | 113.26 |  |
| Russia                       | RiceMilledEquivalent | 4.71   |  |
| Russia                       | wheatandproducts     | 130.99 |  |
| Russia                       | wine                 | 9.15   |  |
| Rwanda                       | BeveragesAlcoholic   | 0.26   |  |
| Rwanda                       | Maizeandproducts     | 14.34  |  |
| Rwanda                       | Potatoesandproducts  | 99.61  |  |
| Rwanda                       | RiceMilledEquivalent | 8.7    |  |
| Rwanda                       | wheatandproducts     | 11.34  |  |
| Rwanda                       | wine                 | 0.06   |  |
| SaintKittsandNevis           | BeveragesAlcoholic   | 2.96   |  |
| SaintKittsandNevis           | Maizeandproducts     | 0.54   |  |
| SaintKittsandNevis           | Potatoesandproducts  | 18.43  |  |
| SaintKittsandNevis           | RiceMilledEquivalent | 19.87  |  |
| SaintKittsandNevis           | wheatandproducts     | 60.68  |  |
| SaintKittsandNevis           | wine                 | 4.3    |  |
| SaintLucia                   | BeveragesAlcoholic   | 6.98   |  |
| SaintLucia                   | Maizeandproducts     | 2.92   |  |
| SaintLucia                   | Potatoesandproducts  | 12.56  |  |
| SaintLucia                   | RiceMilledEquivalent | 10.38  |  |
| SaintLucia                   | wheatandproducts     | 91.02  |  |
| SaintLucia                   | wine                 | 6.34   |  |
| SaintVincentandtheGrenadines | BeveragesAlcoholic   | 9.47   |  |
| SaintVincentandtheGrenadines | Maizeandproducts     | 9.3    |  |
| SaintVincentandtheGrenadines | Potatoesandproducts  | 9.28   |  |
| SaintVincentandtheGrenadines | RiceMilledEquivalent | 33.65  |  |
| SaintVincentandtheGrenadines | wheatandproducts     | 73.91  |  |
| SaintVincentandtheGrenadines | wine                 | 1.81   |  |
| Samoa                        | BeveragesAlcoholic   | 0.16   |  |
| Samoa                        | Maizeandproducts     | 0.4    |  |
| Samoa                        | Potatoesandproducts  | 8.02   |  |
| Samoa                        | RiceMilledEquivalent | 6.02   |  |
| Samoa                        | wheatandproducts     | 61.41  |  |
| Samoa                        | wine                 | 0.62   |  |
| SaoTomeandPrincipe           | BeveragesAlcoholic   | 0.8    |  |
| SaoTomeandPrincipe           | Maizeandproducts     | 7.09   |  |
| SaoTomeandPrincipe           | Potatoesandproducts  | 1.99   |  |
| SaoTomeandPrincipe           | RiceMilledEquivalent | 35.05  |  |
| SaoTomeandPrincipe           | wheatandproducts     | 55.37  |  |
| SaoTomeandPrincipe           | wine                 | 22.32  |  |
| SaudiArabia                  | Maizeandproducts     | 20.77  |  |
| SaudiArabia                  | Potatoesandproducts  | 23.24  |  |
| SaudiArabia                  | RiceMilledEquivalent | 36.02  |  |



|                |                      |        |
|----------------|----------------------|--------|
| SaudiArabia    | wheatandproducts     | 89.47  |
| SaudiArabia    | wine                 | 0      |
| Senegal        | BeveragesAlcoholic   | 0.01   |
| Senegal        | Maizeandproducts     | 25.81  |
| Senegal        | Potatoesandproducts  | 5.5    |
| Senegal        | RiceMilledEquivalent | 72.29  |
| Senegal        | wheatandproducts     | 37.32  |
| Senegal        | wine                 | 0.39   |
| Serbia         | BeveragesAlcoholic   | 6.91   |
| Serbia         | Maizeandproducts     | 23.05  |
| Serbia         | Potatoesandproducts  | 40.25  |
| Serbia         | RiceMilledEquivalent | 1.22   |
| Serbia         | wheatandproducts     | 105.88 |
| Serbia         | wine                 | 25.47  |
| SierraLeone    | BeveragesAlcoholic   | 0.07   |
| SierraLeone    | Maizeandproducts     | 4.56   |
| SierraLeone    | Potatoesandproducts  | 0.32   |
| SierraLeone    | RiceMilledEquivalent | 103.3  |
| SierraLeone    | wheatandproducts     | 8.72   |
| SierraLeone    | wine                 | 0.05   |
| Slovakia       | BeveragesAlcoholic   | 5.42   |
| Slovakia       | Maizeandproducts     | 0      |
| Slovakia       | Potatoesandproducts  | 52.19  |
| Slovakia       | RiceMilledEquivalent | 2.88   |
| Slovakia       | wheatandproducts     | 123.62 |
| Slovakia       | wine                 | 3.88   |
| Slovenia       | BeveragesAlcoholic   | 1.66   |
| Slovenia       | Maizeandproducts     | 32.72  |
| Slovenia       | Potatoesandproducts  | 53.07  |
| Slovenia       | RiceMilledEquivalent | 3.95   |
| Slovenia       | wheatandproducts     | 103.43 |
| Slovenia       | wine                 | 9.56   |
| SolomonIslands | BeveragesAlcoholic   | 0.03   |
| SolomonIslands | Maizeandproducts     | 0.15   |
| SolomonIslands | Potatoesandproducts  | 0.17   |
| SolomonIslands | RiceMilledEquivalent | 63.76  |
| SolomonIslands | wheatandproducts     | 25.37  |
| SolomonIslands | wine                 | 0.07   |
| SouthAfrica    | BeveragesAlcoholic   | 6.38   |
| SouthAfrica    | Maizeandproducts     | 100.1  |
| SouthAfrica    | Potatoesandproducts  | 30.66  |
| SouthAfrica    | RiceMilledEquivalent | 17.41  |
| SouthAfrica    | wheatandproducts     | 60.13  |
| SouthAfrica    | wine                 | 7.71   |
| Spain          | BeveragesAlcoholic   | 2.13   |
| Spain          | Maizeandproducts     | 1.99   |
| Spain          | Potatoesandproducts  | 60.04  |
| Spain          | RiceMilledEquivalent | 8.32   |
| Spain          | wheatandproducts     | 93.88  |
| Spain          | wine                 | 20.98  |
| SriLanka       | BeveragesAlcoholic   | 0.2    |
| SriLanka       | Maizeandproducts     | 5.08   |
| SriLanka       | Potatoesandproducts  | 8.36   |
| SriLanka       | RiceMilledEquivalent | 109.72 |
| SriLanka       | wheatandproducts     | 37.01  |
| SriLanka       | wine                 | 0.07   |
| Sudan          | BeveragesAlcoholic   | 0.53   |
| Sudan          | Maizeandproducts     | 0.4    |
| Sudan          | Potatoesandproducts  | 9.26   |
| Sudan          | RiceMilledEquivalent | 1.27   |
| Sudan          | wheatandproducts     | 22.52  |
| Suriname       | BeveragesAlcoholic   | 4.61   |
| Suriname       | Maizeandproducts     | 1.93   |
| Suriname       | Potatoesandproducts  | 19.19  |
| Suriname       | RiceMilledEquivalent | 68.68  |
| Suriname       | wheatandproducts     | 52.81  |
| Suriname       | wine                 | 1.29   |
| Eswatini       | BeveragesAlcoholic   | 0.15   |
| Eswatini       | Maizeandproducts     | 69.83  |
| Eswatini       | Potatoesandproducts  | 12.43  |
| Eswatini       | RiceMilledEquivalent | 21.15  |
| Eswatini       | wheatandproducts     | 37.15  |
| Eswatini       | wine                 | 2.64   |
| Sweden         | BeveragesAlcoholic   | 3.28   |
| Sweden         | Maizeandproducts     | 1.05   |
| Sweden         | Potatoesandproducts  | 59.81  |
| Sweden         | RiceMilledEquivalent | 5.96   |
| Sweden         | wheatandproducts     | 79.59  |
| Sweden         | wine                 | 20.75  |
| Switzerland    | BeveragesAlcoholic   | 2.94   |
| Switzerland    | Maizeandproducts     | 0.73   |
| Switzerland    | Potatoesandproducts  | 40.73  |
| Switzerland    | RiceMilledEquivalent | 2.43   |
| Switzerland    | wheatandproducts     | 89.51  |
| Switzerland    | wine                 | 36.36  |
| Tajikistan     | BeveragesAlcoholic   | 0.53   |

CoronaAnimalProd\_FoodSupply\_10Sept\_2020.sas

|                   |                      |        |  |
|-------------------|----------------------|--------|--|
| Tajikistan        | Maizeandproducts     | 7.8    |  |
| Tajikistan        | Potatoesandproducts  | 35.91  |  |
| Tajikistan        | RiceMilledEquivalent | 6.99   |  |
| Tajikistan        | wheatandproducts     | 130.59 |  |
| Tajikistan        | wine                 | 0.05   |  |
| Thailand          | BeveragesAlcoholic   | 10.23  |  |
| Thailand          | Maizeandproducts     | 10.16  |  |
| Thailand          | Potatoesandproducts  | 4.87   |  |
| Thailand          | RiceMilledEquivalent | 114.57 |  |
| Thailand          | wheatandproducts     | 10.93  |  |
| Thailand          | wine                 | 0.12   |  |
| NorthMacedonia    | BeveragesAlcoholic   | 1.34   |  |
| NorthMacedonia    | Maizeandproducts     | 22.72  |  |
| NorthMacedonia    | Potatoesandproducts  | 59.27  |  |
| NorthMacedonia    | RiceMilledEquivalent | 2.81   |  |
| NorthMacedonia    | wheatandproducts     | 104.8  |  |
| NorthMacedonia    | wine                 | 2.14   |  |
| Timor-Leste       | BeveragesAlcoholic   | 0.09   |  |
| Timor-Leste       | Maizeandproducts     | 83.55  |  |
| Timor-Leste       | Potatoesandproducts  | 1.85   |  |
| Timor-Leste       | RiceMilledEquivalent | 64.2   |  |
| Timor-Leste       | wheatandproducts     | 13.93  |  |
| Timor-Leste       | wine                 | 0.48   |  |
| Togo              | BeveragesAlcoholic   | 0.47   |  |
| Togo              | Maizeandproducts     | 69.58  |  |
| Togo              | Potatoesandproducts  | 0.51   |  |
| Togo              | RiceMilledEquivalent | 25.99  |  |
| Togo              | wheatandproducts     | 12.91  |  |
| Togo              | wine                 | 0.93   |  |
| TrinidadandTobago | BeveragesAlcoholic   | 3.86   |  |
| TrinidadandTobago | Maizeandproducts     | 9.07   |  |
| TrinidadandTobago | Potatoesandproducts  | 32.29  |  |
| TrinidadandTobago | RiceMilledEquivalent | 16.38  |  |
| TrinidadandTobago | wheatandproducts     | 90.17  |  |
| TrinidadandTobago | wine                 | 1.65   |  |
| Tunisia           | BeveragesAlcoholic   | 0.09   |  |
| Tunisia           | Potatoesandproducts  | 30.97  |  |
| Tunisia           | RiceMilledEquivalent | 1.07   |  |
| Tunisia           | wheatandproducts     | 197.5  |  |
| Tunisia           | wine                 | 2.68   |  |
| Turkey            | BeveragesAlcoholic   | 1.47   |  |
| Turkey            | Maizeandproducts     | 24.3   |  |
| Turkey            | Potatoesandproducts  | 40.04  |  |
| Turkey            | RiceMilledEquivalent | 10.74  |  |
| Turkey            | wheatandproducts     | 169.96 |  |
| Turkey            | wine                 | 0.39   |  |
| Turkmenistan      | BeveragesAlcoholic   | 0.02   |  |
| Turkmenistan      | Maizeandproducts     | 0.01   |  |
| Turkmenistan      | Potatoesandproducts  | 30.53  |  |
| Turkmenistan      | RiceMilledEquivalent | 10.93  |  |
| Turkmenistan      | wheatandproducts     | 188.86 |  |
| Turkmenistan      | wine                 | 7.47   |  |
| Uganda            | BeveragesAlcoholic   | 0.29   |  |
| Uganda            | Maizeandproducts     | 48.95  |  |
| Uganda            | Potatoesandproducts  | 3.94   |  |
| Uganda            | RiceMilledEquivalent | 4.64   |  |
| Uganda            | wheatandproducts     | 10.14  |  |
| Uganda            | wine                 | 0.05   |  |
| Ukraine           | BeveragesAlcoholic   | 9.77   |  |
| Ukraine           | Maizeandproducts     | 10.61  |  |
| Ukraine           | Potatoesandproducts  | 135.94 |  |
| Ukraine           | RiceMilledEquivalent | 3      |  |
| Ukraine           | wheatandproducts     | 105.15 |  |
| Ukraine           | wine                 | 3.94   |  |
| UAE               | Maizeandproducts     | 1.14   |  |
| UAE               | Potatoesandproducts  | 12.93  |  |
| UAE               | RiceMilledEquivalent | 56.25  |  |
| UAE               | wheatandproducts     | 101.29 |  |
| UK                | BeveragesAlcoholic   | 2.6    |  |
| UK                | Maizeandproducts     | 2.9    |  |
| UK                | Potatoesandproducts  | 103.86 |  |
| UK                | RiceMilledEquivalent | 6.39   |  |
| UK                | wheatandproducts     | 98.63  |  |
| UK                | wine                 | 18.69  |  |
| Tanzania          | BeveragesAlcoholic   | 0.07   |  |
| Tanzania          | Maizeandproducts     | 58.47  |  |
| Tanzania          | Potatoesandproducts  | 22.09  |  |
| Tanzania          | RiceMilledEquivalent | 21.01  |  |
| Tanzania          | wheatandproducts     | 15.94  |  |
| Tanzania          | wine                 | 0.12   |  |
| USA               | BeveragesAlcoholic   | 6.43   |  |
| USA               | Maizeandproducts     | 12.24  |  |
| USA               | Potatoesandproducts  | 51.88  |  |
| USA               | RiceMilledEquivalent | 6.88   |  |
| USA               | wheatandproducts     | 80.43  |  |
| USA               | wine                 | 8.47   |  |

```

Uruguay BeveragesAlcoholic 2.24
Uruguay Maizeandproducts 26.6
Uruguay Potatoesandproducts 32.8
Uruguay RiceMilledEquivalent 11.5
Uruguay wheatandproducts 109.31
Uruguay wine 19.27
Uzbekistan BeveragesAlcoholic 3.29
Uzbekistan Maizeandproducts 4.79
Uzbekistan Potatoesandproducts 52.19
Uzbekistan RiceMilledEquivalent 3.87
Uzbekistan wheatandproducts 169.6
Uzbekistan wine 0.99
Vanuatu BeveragesAlcoholic 1.5
Vanuatu Maizeandproducts 0.04
Vanuatu Potatoesandproducts 40.21
Vanuatu RiceMilledEquivalent 41.2
Vanuatu wheatandproducts 51.21
Vanuatu wine 1.01
VenezuelaBolivarianRepublicof BeveragesAlcoholic 3.16
VenezuelaBolivarianRepublicof Maizeandproducts 55.25
VenezuelaBolivarianRepublicof Potatoesandproducts 19.2
VenezuelaBolivarianRepublicof RiceMilledEquivalent 23.39
VenezuelaBolivarianRepublicof wheatandproducts 49.17
VenezuelaBolivarianRepublicof wine 0.35
Vietnam BeveragesAlcoholic 3.46
Vietnam Maizeandproducts 9.74
Vietnam Potatoesandproducts 3.85
Vietnam RiceMilledEquivalent 144.56
Vietnam wheatandproducts 10.49
Vietnam wine 0.13
Yemen BeveragesAlcoholic 0.01
Yemen Maizeandproducts 13.22
Yemen Potatoesandproducts 10.99
Yemen RiceMilledEquivalent 17.36
Yemen wheatandproducts 110.24
Yemen wine 0
Zambia BeveragesAlcoholic 0.02
Zambia Maizeandproducts 118.68
Zambia Potatoesandproducts 2.42
Zambia RiceMilledEquivalent 3.05
Zambia wheatandproducts 12.1
Zambia wine 0.01
Zimbabwe BeveragesAlcoholic 5.15
Zimbabwe Maizeandproducts 93.68
Zimbabwe Potatoesandproducts 3.88
Zimbabwe RiceMilledEquivalent 10.09
Zimbabwe wheatandproducts 31.31
Zimbabwe wine 0.27
;
run;

```

/\*\*\*\*\* DATA Corona 10 sept 2020 \*\*\*\*\*/

```

data corona;
input Num country $ Totalcases Newcases TotalDeaths NewDeaths
TotalRecovered ActiveCases SeriousCases TotCases1mpop Deaths1mpop;
cards;
1 USA 6558095 8620 195566 327 3856335 2506194 14575
19790 590
2 India 4494389 31424 75328 237 3490908 928153 8944
3251 54
3 Brazil 4199332 . 128653 . 3453336 617343 8318 19729
4 604
Russia 1046370 5363 18263 128 862373 165734 2300 7170
5 125
Peru 702776 . 30236 . 536959 135581 1476 21258
915
6 Colombia 686856 . 22053 . 552885 111918 863 13471
433
7 Mexico 647507 4647 69095 611 454982 123430 2919 5012
8 535
SouthAfrica 642431 . 15168 . 569935 57328 539 10806
9 255
Spain 543379 . 29628 . 390098 1051 11621 634
10 Argentina 512293 . 10713 55 111482 2719 11315
11 237
Chile 428669 1642 11781 79 401356 15532 951 22387
615

```

CoronaAnimalProd\_FoodSupply\_10Sept\_2020.sas

|    |             |        |      |       |     |        |        |      |       |
|----|-------------|--------|------|-------|-----|--------|--------|------|-------|
| 12 | Iran        | 395488 | 2063 | 22798 | 129 | 340842 | 31848  | 3728 | 4697  |
| 13 | UK          | 358138 | 2919 | 41608 | 14  | .      | 80     | 5270 | 612   |
| 14 | France      | 344101 | .    | 30794 | .   | 88524  | 224783 | 599  | 5269  |
| 15 | Bangladesh  | 332970 | 1892 | 4634  | 41  | 233550 | 94786  | .    | 2018  |
| 16 | SaudiArabia | 323720 | 708  | 4189  | 24  | 299998 | 19533  | 1363 |       |
| 17 | Pakistan    | 299855 | 196  | 6365  | 6   | 287950 | 5540   | 550  | 1353  |
| 18 | Turkey      | 284943 | .    | 6837  | .   | 254188 | 23918  | 1181 | 3372  |
| 19 | Italy       | 283180 | 1597 | 35587 | 10  | 211885 | 35708  | 164  | 4685  |
| 20 | Iraq        | 278418 | 4597 | 7814  | 82  | 213817 | 56787  | 540  | 6893  |
| 21 | Germany     | 256835 | 486  | 9412  | 2   | 231900 | 15523  | 227  | 3064  |
| 22 | Philippines | 248947 | 3821 | 4066  | 80  | 186058 | 58823  | 990  |       |
| 23 | Indonesia   | 207203 | 3861 | 8456  | 120 | 147510 | 51237  | .    | 756   |
| 24 | Ukraine     | 145612 | 2582 | 3023  | 44  | 65877  | 76712  | 177  | 3333  |
| 25 | Israel      | 143049 | 1952 | 1055  | 1   | 109775 | 32219  | 487  | 15553 |
| 26 | Canada      | 134464 | 170  | 9156  | 1   | 118271 | 7037   | 57   | 3557  |
| 27 | Bolivia     | 123345 | 1037 | 7146  | 49  | 77216  | 38983  | 71   | 10539 |
| 28 | Qatar       | 121052 | 206  | 205   | .   | 117978 | 2869   | 47   | 43113 |
| 29 | Ecuador     | 112166 | .    | 10701 | .   | 91242  | 10223  | 374  | 6339  |
| 30 | Kazakhstan  | 106584 | 86   | 1634  | .   | 100248 | 4702   | 221  | 5663  |
| 31 | dominr      | 100937 | .    | 1914  | .   | 74305  | 24718  | 210  | 9287  |
| 32 | Egypt       | 100403 | .    | 5577  | .   | 80689  | 14137  | 41   | 978   |
| 33 | Romania     | 99684  | 1380 | 4065  | 47  | 41010  | 54609  | 459  | 5189  |
| 34 | Panama      | 99042  | .    | 2116  | .   | 71419  | 25507  | 132  | 22886 |
| 35 | Kuwait      | 92822  | 740  | 556   | 4   | 83040  | 9226   | 90   | 21675 |
| 36 | Belgium     | 89691  | 550  | 9917  | 5   | 18635  | 61139  | 59   | 7732  |
| 37 | Oman        | 88337  | 398  | 762   | 11  | 83325  | 4250   | 161  | 17218 |
| 38 | Sweden      | 86194  | .    | 5843  | 4   | .      | 13     | 8524 | 578   |
| 39 | China       | 85153  | 7    | 4634  | .   | 80358  | 161    | 3    | 59    |
| 40 | Guatemala   | 79622  | .    | 2897  | .   | 68308  | 8417   | 5    | 4429  |
| 41 | Netherlands | 78511  | 823  | 6249  | 3   | .      | .      | 47   | 4580  |
| 42 | Morocco     | 77878  | .    | 1453  | .   | 59723  | 16702  | 240  | 2105  |
| 43 | UAE         | 76911  | 930  | 398   | 5   | 67945  | 8568   | .    | 7758  |
| 44 | Belarus     | 73591  | 189  | 732   | 6   | 72203  | 656    | 202  | 7788  |
| 45 | Japan       | 72726  | .    | 1393  | .   | 64100  | 7233   | 202  | 575   |
| 46 | Poland      | 72453  | 506  | 2159  | 12  | 58069  | 12225  | 84   | 1915  |
| 47 | Honduras    | 65597  | 379  | 2044  | 10  | 15064  | 48489  | 33   | 6603  |
| 48 | Portugal    | 62126  | 585  | 1852  | 3   | 43441  | 16833  | 57   | 6096  |
| 49 | Ethiopia    | 61700  | .    | 966   | .   | 23054  | 37680  | 309  | 534   |
| 50 | Bahrain     | 57450  | .    | 206   | 3   | 51819  | 5425   | 27   | 33553 |
| 51 | Singapore   | 57229  | 63   | 27    | .   | 56558  | 644    | .    | 9767  |
| 52 | Venezuela   | 56751  | .    | 452   | .   | 45318  | 10981  | 111  | 1997  |
| 53 | Nigeria     | 55632  | .    | 1070  | .   | 43610  | 10952  | 7    | 269   |
| 54 | CostaRica   | 51224  | .    | 543   | .   | 19544  | 31137  | 237  | 10038 |
| 55 | Nepal       | 50465  | 1246 | 317   | 5   | 35700  | 14448  | .    | 1726  |
| 56 | Algeria     | 47216  | .    | 1581  | .   | 33379  | 12256  | 40   | 1073  |
| 57 | Switzerland | 45711  | 405  | 2020  | 1   | 38100  | 5591   | 24   | 5274  |
| 58 | Uzbekistan  | 45473  | 543  | 370   | 4   | 42509  | 2594   | 224  | 1355  |
| 59 | Armenia     | 45326  | 174  | 906   | 1   | 41233  | 3187   | .    | 15291 |
| 60 | Ghana       | 45313  | .    | 283   | .   | 44188  | 842    | 5    | 1453  |
| 61 | Kyrgyzstan  | 44684  | 71   | 1061  | .   | 40487  | 3136   | 24   | 6828  |
| 62 | Moldova     | 41704  | 560  | 1106  | 10  | 28962  | 11636  | 549  | 10343 |
| 63 | Afghanistan | 38572  | 28   | 1420  | .   | 31129  | 6023   | 93   | 987   |
| 64 | Azerbaijan  | 37874  | 142  | 556   | 1   | 35269  | 2049   | .    | 3729  |
| 65 | Kenya       | 35460  | .    | 607   | .   | 21557  | 13296  | 44   | 657   |
| 66 | Serbia      | 32136  | 58   | 729   | 1   | 30943  | 464    | 35   | 3681  |
| 67 | Austria     | 31247  | 664  | 748   | 1   | 26043  | 4456   | 39   | 3466  |
| 68 | Czechia     | 31036  | .    | 444   | .   | 20374  | 10218  | 57   | 2897  |
| 69 | Ireland     | 30164  | .    | 1781  | .   | 23364  | 5019   | 7    | 6096  |
| 70 | Palestine   | 28664  | 745  | 198   | 6   | 18821  | 9645   | .    | 5595  |

CoronaAnimalProd\_FoodSupply\_10Sept\_2020.sas

|      |                      |       |       |     |    |       |       |       |       |      |
|------|----------------------|-------|-------|-----|----|-------|-------|-------|-------|------|
| 71   | ElSalvador           | 26688 | 86    | 774 | 4  | 17106 | 8808  | 232   | 4111  |      |
| 119  |                      |       |       |     |    |       |       |       |       |      |
| 72   | Australia            | 26513 | 48    | 788 | 7  | 23036 | 2689  | 23    | 1037  | 31   |
| 73   | Paraguay             | 25026 |       | 474 |    | 12309 | 12243 | 113   | 3501  | 66   |
| 74   | BosniaandHerzegovina |       | 22544 | 286 |    | 680   | 5     | 15273 | 6591  |      |
| 6880 | 208                  |       |       |     |    |       |       |       |       |      |
| 75   | Lebanon              | 21877 |       | 212 |    | 7024  | 14641 | 121   | 3208  | 31   |
| 76   | S.Korea              | 21743 | 155   | 346 | 2  | 17360 | 4037  | 169   | 424   | 7    |
| 77   | Libya                | 20939 | 477   | 339 | 15 | 2420  | 18180 |       | 3039  | 49   |
| 78   | Cameroon             | 19848 |       | 415 |    | 18448 | 985   | 30    | 744   | 16   |
| 79   | Denmark              | 18924 | 317   | 629 | 1  | 16069 | 2226  | 5     | 3265  | 109  |
| 80   | IvoryCoast           | 18815 |       | 119 |    | 17770 | 926   |       | 710   | 4    |
| 81   | Bulgaria             | 17435 |       | 702 |    | 12474 | 4259  | 60    | 2513  | 101  |
| 82   | Madagascar           | 15624 | 104   | 208 | 2  | 14295 | 1121  | 48    | 562   | 7    |
| 83   | NorthMacedonia       | 15293 |       | 634 |    | 12754 | 1905  | 4     | 7341  |      |
| 304  |                      |       |       |     |    |       |       |       |       |      |
| 84   | Senegal              | 14150 | 48    | 293 |    | 10207 | 3650  | 34    | 841   | 17   |
| 85   | Sudan                | 13437 |       | 833 |    | 6730  | 5874  |       | 305   | 19   |
| 86   | Zambia               | 13214 | 102   | 300 |    | 11899 | 1015  |       | 715   | 16   |
| 87   | Croatia              | 12917 | 291   | 208 | 2  | 10142 | 2567  | 24    | 3150  | 51   |
| 88   | Greece               | 12080 |       | 293 |    | 3804  | 7983  | 46    | 1160  | 28   |
| 89   | Norway               | 11801 | 55    | 265 | 1  | 9348  | 2188  | 1     | 2174  | 49   |
| 90   | Albania              | 10704 |       | 322 |    | 6284  | 4098  | 19    | 3720  | 112  |
| 91   | DRC                  | 10343 | 19    | 262 | 2  | 9533  | 548   |       | 115   | 3    |
| 92   | Hungary              | 10191 | 476   | 630 | 2  | 3990  | 5571  | 11    | 1055  | 65   |
| 93   | Guinea               | 9885  |       | 63  |    | 9068  | 754   | 24    | 749   | 5    |
| 94   | Malaysia             | 9628  | 45    | 128 |    | 9167  | 333   | 9     | 297   | 4    |
| 95   | FrenchGuiana         | 9418  |       | 62  |    | 8986  | 370   | 9     | 31382 | 207  |
| 96   | Namibia              | 9256  | 148   | 96  | 3  | 4767  | 4393  | 20    | 3630  | 38   |
| 97   | Tajikistan           | 8939  | 40    | 72  | 1  | 7714  | 1153  |       | 933   | 8    |
| 98   | Maldives             | 8834  |       | 31  |    | 6288  | 2515  | 12    | 16289 | 57   |
| 99   | Gabon                | 8621  |       | 53  |    | 7618  | 950   | 2     | 3856  | 24   |
| 100  | Finland              | 8469  | 39    | 337 |    | 7500  | 632   | 1     | 1528  | 61   |
| 101  | Haiti                | 8384  |       | 214 |    | 5991  | 2179  |       | 734   | 19   |
| 102  | Zimbabwe             | 7429  |       | 222 |    | 5542  | 1665  |       | 498   | 15   |
| 103  | Mauritania           | 7191  |       | 161 |    | 6701  | 329   | 3     | 1539  | 34   |
| 104  | Luxembourg           | 7023  |       | 124 |    | 6292  | 607   |       | 11185 | 197  |
| 105  | Montenegro           | 6094  |       | 114 |    | 4350  | 1630  |       | 9703  | 182  |
| 106  | Malawi               | 5653  |       | 176 |    | 3630  | 1847  | 4     | 294   | 9    |
| 107  | Tunisia              | 5417  |       | 96  |    | 1862  | 3459  | 26    | 457   | 8    |
| 108  | Djibouti             | 5391  |       | 61  |    | 5327  | 3     |       | 5441  | 62   |
| 109  | Slovakia             | 5066  | 178   | 37  |    | 3001  | 2028  | 24    | 928   | 7    |
| 110  | EquatorialGuinea     | 4990  |       |     | 83 |       | 4479  | 428   |       | 3536 |
| 59   |                      |       |       |     |    |       |       |       |       |      |
| 111  | Eswatini             | 4936  |       | 97  |    | 4077  | 762   | 11    | 4246  | 83   |
| 112  | HongKong             | 4914  | 12    | 99  |    | 4582  | 233   | 21    | 654   | 13   |
| 113  | Congo                | 4891  |       | 83  |    | 3887  | 921   |       | 882   | 15   |
| 114  | Nicaragua            | 4818  |       | 144 |    | 2913  | 1761  |       | 726   | 22   |
| 115  | Mozambique           | 4764  |       | 28  |    | 2763  | 1973  |       | 152   | 1    |
| 116  | CAR                  | 4736  |       | 62  |    | 1825  | 2849  | 2     | 977   | 13   |
| 117  | CaboVerde            | 4473  |       | 43  |    | 3915  | 515   |       | 8028  | 77   |
| 118  | Rwanda               | 4460  |       | 21  |    | 2325  | 2114  |       | 343   | 2    |
| 119  | Cuba                 | 4459  |       | 104 |    | 3727  | 628   | 1     | 394   | 9    |
| 120  | Suriname             | 4447  |       | 92  |    | 3622  | 733   | 8     | 7568  | 157  |
| 121  | Uganda               | 4291  | 190   | 48  | 2  | 1998  | 2245  |       | 93    | 1    |
| 122  | Thailand             | 3454  | 7     | 58  |    | 3310  | 86    | 1     | 49    | 1    |
| 123  | Jamaica              | 3437  | 114   | 38  | 2  | 1019  | 2380  | 8     | 1160  | 13   |
| 124  | Slovenia             | 3389  | 77    | 135 |    | 2620  | 634   | 5     | 1630  | 65   |
| 125  | Mayotte              | 3374  |       | 40  |    | 2964  | 370   | 2     | 12312 | 146  |
| 126  | Somalia              | 3371  |       | 97  |    | 2738  | 536   |       | 211   | 6    |
| 127  | Syria                | 3351  |       | 143 |    | 780   | 2428  |       | 191   | 8    |
| 128  | Gambia               | 3293  |       | 99  |    | 1460  | 1734  |       | 1356  | 41   |
| 129  | Lithuania            | 3199  | 36    | 86  |    | 2030  | 1083  |       | 1178  | 32   |
| 130  | SriLanka             | 3152  | 5     | 12  |    | 2955  | 185   |       | 147   | 1    |
| 131  | Angola               | 3092  |       | 126 |    | 1245  | 1721  | 24    | 94    | 4    |
| 132  | Mali                 | 2898  |       | 128 |    | 2267  | 503   |       | 142   | 6    |
| 133  | Jordan               | 2739  | 80    | 20  | 1  | 1981  | 738   | 3     | 268   | 2    |
| 134  | Aruba                | 2730  |       | 15  |    | 1351  | 1364  | 11    | 25549 | 140  |
| 135  | Bahamas              | 2721  | 64    | 63  |    | 1183  | 1475  | 75    | 6907  | 160  |
| 136  | Estonia              | 2600  | 15    | 64  |    | 2223  | 313   | 1     | 1960  | 48   |
| 137  | TrinidadandTobago    | 2588  |       |     | 39 |       | 749   | 1800  | 15    | 1848 |
| 28   |                      |       |       |     |    |       |       |       |       |      |
| 138  | SouthSudan           | 2555  |       | 49  |    | 1290  | 1216  |       | 228   | 4    |
| 139  | Réunion              | 2416  |       | 13  |    | 1313  | 1090  |       | 2695  | 15   |
| 140  | Guadeloupe           | 2287  |       | 23  |    | 336   | 1928  | 7     | 5716  | 57   |
| 141  | Guinea-Bissau        | 2245  |       | 38  |    | 1127  | 1080  |       | 5     | 1136 |
| 142  | Benin                | 2242  |       | 40  |    | 1793  | 409   |       | 184   | 3    |
| 143  | Malta                | 2204  | 42    | 14  |    | 1803  | 387   | 2     | 4989  | 32   |
| 144  | Iceland              | 2157  | 4     | 10  |    | 2072  | 75    |       | 6313  | 29   |
| 145  | Myanmar              | 2150  | 261   | 14  | 2  | 625   | 1511  |       | 39    | 0    |
| 146  | Botswana             | 2126  |       | 9   |    | 493   | 1624  | 1     | 901   | 4    |
| 147  | Sierraleone          | 2067  |       | 72  |    | 1622  | 373   |       | 258   | 9    |
| 148  | Yemen                | 1999  |       | 576 |    | 1209  | 214   |       | 67    | 19   |
| 149  | Georgia              | 1830  | 57    | 19  |    | 1334  | 477   |       | 459   | 5    |
| 150  | NewZealand           | 1792  | 4     | 24  |    | 1648  | 120   | 3     | 358   | 5    |
| 151  | Uruguay              | 1741  |       | 45  |    | 1478  | 218   | 2     | 501   | 13   |

```

CoronaAnimalProd_FoodSupply_10Sept_2020.sas
152 Guyana 1703 . . 48 . . 1045 610 16 2163 61
153 Togo 1528 . . 36 . . 1144 348 . 184 4
154 Cyprus 1514 . . 22 . . 1237 255 5 1252 18
155 BurkinaFaso 1476 . . . 56 . . 1118 302 . 70 3
156 Latvia 1448 5 . 35 . . 1248 165 . 769 19
157 Belize 1365 4 . 18 2 . 326 1021 3 3421 45
158 Liberia 1313 . . 82 . . 1194 37 . 258 16
159 Andorra 1301 . . 53 . . 938 310 3 16833 686
160 Niger 1178 . . 69 . . 1099 10 . 48 3
161 Lesotho 1164 . . 31 . . 528 605 . 543 14
162 Vietnam 1059 . . 35 . . 890 134 . 11 0
163 Chad 1048 . . 79 . . 931 38 . 63 5
164 Martinique 939 . . 18 . . 98 823 5 2503 48
165 SaoTomeandPrincipe 898 . . 15 . . 862 21 . 4083 68
166 FrenchPolynesia 795 . . . . . 528 267 4 2827 .
167 SanMarino 722 . . 42 . . 662 18 1 21270 1237
168 DiamondPrincess 712 . . 13 . . 651 48 4 3623 276
169 ChannelIslands 631 . . 48 . . 575 8 1 16179 129
170 TurksandCaicos 628 . . 14 5 . 266 357 4 12334 442
171 SintMaarten 530 3 19 . . 333 178 6 0 442
172 Tanzania 509 . . 21 . . 183 305 7 8 0
173 PapuaNewGuinea 504 . . 1 5 . 232 267 . 56 1
174 Taiwan 496 1 7 . . 475 14 . 21 0
175 Burundi 466 . . 1 . . 374 91 . 39 0
176 Comoros 456 . . 7 . . 415 34 . 522 8
177 FaeroeIslands 415 . . . . . 410 5 1 8487 .
178 Mauritius 361 . . 10 . . 335 16 . 284 8
179 Eritrea 341 . . . . . 295 46 . 96 .
180 IsleofMan 337 . . 24 . . 312 1 1 3959 282
181 Gibraltar 323 1 . . . . 287 36 1 9588 .
182 Mongolia 310 . . . . . 298 12 1 94 .
183 Cambodia 274 . . . . . 273 1 1 16 .
184 SaintMartin 256 . . 6 . . 107 143 11 6600 155
185 Bhutan 234 . . . . . 155 79 . 303 .
186 CaymanIslands 207 . . 1 . . 204 2 . 3143 15
187 Barbados 180 . . 7 . . 156 17 . 626 24
188 Bermuda 177 . . 9 . . 159 9 . 2844 145
189 Monaco 161 . . 1 . . 107 53 1 4097 25
190 Brunei 145 . . 3 . . 139 3 . 331 7
191 Seychelles 137 . . . . . 127 10 . 1391 .
192 Curaçao 116 . . 1 . . 51 64 1 706 6
193 Liechtenstein 109 1 1 . . 105 3 3 2857 26
194 AntiguaandBarbuda 95 . . 3 . . 91 1 1 969 31
195 BritishVirginIslands 63 . . 1 . . 10 52 2 2081 33
196 St.VincentGrenadines 62 . . . . . 58 4 . 559 .
197 Macao 46 . . . . . 46 0 71 . .
198 Fiji 32 . . 2 . . 24 6 1 36 147
199 SaintLucia 27 . . . . . 26 1 . 20 91
200 Timor-Leste 27 . . . . . 25 2 . 20 .
201 NewCaledonia 26 . . . . . 25 1 7 91 952
202 CaribbeanNetherlands 25 . . 4 . . 7 18 . .
203 Dominica 24 2 . . . . 18 6 . 333 .
204 Grenada 24 . . . . . 24 0 . 213 .
205 Laos 22 . . . . . 21 1 . 3 .
206 St.Barth 21 . . . . . 13 8 . 2125 319
207 SaintKittsandNevis 17 . . . . . 14 0 0 247 200
208 Greenland 14 . . . . . 14 0 . 2604 3716
209 Montserrat 13 . . 1 . . 12 0 . 14981 17
210 FalklandIslands 13 13 . . . . 13 0 0 . 2 1728
211 VaticanCity 12 . . . . . 12 0 . . .
212 WesternSahara 10 10 1 . . 8 1 5 . .
213 SaintPierreMiquelon 9 . . 2 . . 7 . 5 . .
214 MSZaandam 9 . . . . . 7 . . . .
215 Anguilla 3 . . . . . 3 0 . 200 .
;
run;

```

```

proc means data=corona;
run;

```

```

proc sort data=crop;
by element;

```

```

proc sort data=food;
by country;
run;

```

```

proc sort data=crop;
by country;
run;

```

```
data pig;
set food;
  if element="Pigmeat" ;
keep country quantity;
run;
```

```
data pig2;
set pig;
rename quantity=pig;
run;
```

```
data bov;
set food;
if element="BovineMe";
keep country quantity;
run;
```

```
data bov2;
set bov;
rename quantity=bov;
run;
proc means data=bov2;
run;
```

```
data che;
set food;
if element="Cheese";
keep country quantity;
run;
```

```
data che2;
set che;
rename quantity=che;
run;
proc means data=che2;
run;
```

```
data cre;
set food;
if element="Cream";
keep country quantity;
run;
data cre2;
set cre;
rename quantity=cre;
run;
```

```
data egg;
set food;
if element="Eggs";
keep country quantity;
run;
data egg2;
set egg;
rename quantity=Egg;
run;
proc means data=egg2;
run;
```

```
data Fre; /* freshwater fish */
set food;
if element="Freshwat";
keep country quantity;
run;
data fre2;
set fre;
rename quantity=freshf;
run;
```

```
data hon; /* Honey */
set food;
if element="Honey";
keep country quantity;
run;
data hon2;
set hon;
rename quantity=hon;
run;
```

```
data mil;
set food;
if element="Milkwho1";
keep country quantity;
run;
data mil2;
set mil;
rename quantity=milk;
run;
```

```
data pou;
set food;
if element="PoultryM";
keep country quantity;
run;
data pou2;
set pou;
rename quantity=poul;
run;
```

```
data dem;
set food;
if element="Demersal";
keep country quantity;
run;
data dem2;
set dem;
rename quantity=demer;
run;
```

```
data cep;
set food;
if element="Cephalop";
keep country quantity;
run;
data cep2;
set cep;
rename quantity=ceph;
run;
```

```
data but;
set food;
if element="ButterGh";
keep country quantity;
run;
data but2;
set but;
rename quantity=butg;
run;
```

```
data mar;          /* Marine Fish */
set food;
if element="MarineFi";
keep country quantity;
rename quantity=marf;
run;
```

```
data aqp;          /* aquatic plants */
set food;
if element="AquaticP";
keep country quantity;
rename quantity=aqp;
run;
```

```
data bev;
set crop;
if element="Beverage";
keep country quantity;
rename quantity=bev;
run;
```

```
data rice;
set crop;
if element="RiceMill";
keep country quantity;
run;
data rice2;
set rice;
```



```
rename quantity=rice;
run;
```

```
data pot;
set crop;
if element="Potatoes" ;
keep country quantity;
rename quantity=potato;
run;
```

```
data maiz;
set crop;
if element="Maizeand" ;
keep country quantity;
rename quantity=maiz;
run;
```

```
data wheat;
set crop;
if element="wheatand" ;
keep country quantity;
rename quantity=wheat;
run;
```

```
data wine;
set crop;
if element="wine" ;
keep country quantity;
rename quantity=wine;
run;
```

```
proc sort data=corona;
by country;
run;
```

```
data all;
merge pig2 bov2 che2 cre2 egg2 fre2 hon2 mil2 pou2 dem2 cep2 but2 mar aqp      bev rice2 pot maiz
wheat wine ;
by country;
run;
data all2;
merge all corona;
by country;
run;
```

```
data all3;
set all2;
logtot=log(Totalcases+1);
logtlm=log(TotCasesImpop+1);
logpig=log(pig+1);
logbov=log(bov+1);
logche=log(che+1);
logcre=log(cre+1);
logegg=log(egg+1);
logfreshf=log(freshf+1);
loghon=log(hon+1);
logmilk=log(milk+1);
logpoul=log(poul+1);
logdemer=log(demer+1);
logceph=log(ceph+1);
logbutg=log(butg+1);
logmarf=log(marf+1);
logaqp=log(aqp+1);
logbev=log(bev+1);
logrice=log(rice+1);
logpotato=log(potato+1);
logmaiz=log(maiz+1);
logwheat=log(wheat+1);
logwine=log(wine+1);
run;
```

```
/*
proc print data=all3;
var country totalcases logtot pig logpig;
run;
*/
```

CoronaAnimalProd\_FoodSupply\_10Sept\_2020.sas

```

proc univariate data=all3 normal plots;histogram;
var logtot totalcases pig logpig che logche bov logbov cre logcre egg logegg ;
run;

proc means data=all3;
run;

proc freq data=all3;
table country;
run;

/*
proc freq data=all3;
table country;
run;
*/

/***** CORR *****/
title " corr ";
proc corr data=all3 pearson spearman ;
var Totalcases logtot ;
with logpig logbov logche logcre logegg logfreshf loghon logmilk
logpoul
logdemer logceph logbutg logmarf logaqp
logbev logrice logpotato logmaiz logwheat logwine ;
run;

/***** REG *****/
/*
*/

title " logtot model logtransformation ";
proc reg data=all3 ;
model logtot = logpig logbov logche logcre logegg logfreshf loghon logmilk logpoul
logdemer logceph logbutg logmarf logaqp
logrice logpotato logmaiz logwheat
/ selection=stepwise slentry=0.10 slstay=0.01 vif ;

run;
quit;

/***** LASSO *****/
/*
ods graphics on/ labelmax=400;
title " logtot lasso ";
proc glmselect data=all3 plots=all ;
model logtot = pig bov che cre egg freshf hon milk poul
demer ceph butg marf aqp
rice potato maiz wheat / selection=lasso (choose =cp
steps=100 );
run;

ods rtf close;
*/

```

CoronaAnimalProd\_FoodSupply\_10Sept\_2020.sas

```
ods graphics on/ labelmax=400;
  title " tot arithm lasso ";
proc glmselect data=all3 plots=all ;
  model logtot =logpig logbov logche logcre logegg logfreshf loghon logmilk logpoul
              logdemer logceph logbutg logmarf logaqp
              logrice logpotato logmaiz logwheat / selection=lasso (choose =cp
steps=200 );
run;

ods rtf close;
```

```
/*
*****
PCA
*****
*/
```

```
/*
ods graphics on;
proc princomp data=all3 n=3 plots (ncomp=3)=pattern;
  id country;
  var logtot logpig logbov logche logcre logegg logfreshf loghon logmilk
logpoul
      logdemer logceph logbutg logmarf logaqp
      logbev logrice logpotato logmaiz logwheat logwine ;
title ' logtot logarithmic PCA of Food Consumption and COVID-19 Parameters ';
run;
ods rtf close;
```

```
ods graphics on;
proc princomp data=all3 n=6 plots (ncomp=3)=pattern;
  id country;
  var totalcases pig bov che cre egg freshf hon milk pou1
      demer butg
      rice potato maiz wheat;
title ' model 2 PCA of Food Consumption and COVID-19 Parameters ';
run;
ods rtf close; */
```

```
/*
*****
Bayesian
*****
*/
```

```
ods graphics on ; title " Bayesian Logarithmic ";
proc genmod data=all3;
  model logtot =logpig logbov logche logcre logegg logfreshf loghon logmilk logpoul
              logdemer logceph logbutg logmarf logaqp
              logbev logrice logpotato logmaiz logwheat logwine ;
  bayes seed=12345 OutPost=PostSurg;
run;
```

```
ods rtf close;
```

```
/** Statements compute the estimate of the probability of being positive ***/
```

```
data Prob;
  set PostSurg;
  pig2 = (logpig > 0);
  bov2=(logbov >0);

  che2=(logche >0);
  cre2=(logcre >0);
  egg2=(logegg>0);
  freshf2=(logfreshf>0); freshfn2=(logfreshf<0);
  hon2=(loghon>0);
  milk2=(logmilk >0); pou12=(logpou1>0); demer2=(logdemer>0);
  ceph2=(logceph>0);
  butg2=(logbutg>0);

  marf2=(logmarf>0); marfn2=(logmarf<0);
  aqp2=(logaqp>0);
  bev2=(logbev >0);
  rice2=(logrice>0);
  ricen2=(logrice<0);

  potato2=(logpotato>0);
  maiz2=(logmaiz>0);
  maizn2=(logmaiz <0);
  wheat2=(logwheat>0);
  wine2=(logwine>0);
  run;

  title " logtot logarithmic freshfn2=(freshf<0) ";
proc Means data = Prob(keep=pig2
  bov2 che2 cre2 egg2 freshf2 freshfn2 hon2 milk2 pou12 demer2
  ceph2 butg2 marf2 marfn2 marfn2 aqp2
  bev2 rice2 ricen2 potato2 maiz2 maizn2 wheat2 wine2 ) n mean;
run;

quit;
```
